# Supplementary material for: Fluorination of Naturally Occurring N6-Benzyladenosine Remarkably Increased Its Antiviral Activity and Selectivity
Source: PubMed Central journal article supplement (PMC6152005; doi:10.3390/molecules22071219), 2017-07-20
Supplement: molecules-22-01219-s001.pdf [file molecules-22-01219-s001.pdf]

## Fluorination of naturally occurring *N*<sup>6</sup>-benzyladenosine remarkably increased its antiviral activity and selectivity

### (Supplementary material)

Vladimir E. Oslovsky<sup>1</sup>, Mikhail S. Drenichev<sup>1</sup>, Liang Sun<sup>2</sup>, Nikolay N. Kurochkin<sup>1</sup>, Vladislav E. Kunetsky<sup>1</sup>, Carmen Mirabelli<sup>2</sup>, Johan Neyts<sup>2</sup>, Pieter Leysen<sup>2</sup>, Sergey N. Mikhailov<sup>1</sup> \*

<sup>1</sup> *Engelhardt Institute of Molecular Biology, Russian Academy of Sciences, 119991, Vavilov Str. 32, Moscow, Russian Federation.*

<sup>2</sup> *KU Leuven - University of Leuven, Department of Microbiology and Immunology, Laboratory for Virology and Chemotherapy, Rega Institute for Medical Research, Minderbroedersstraat 10, 3000 Leuven, Belgium.*

\* Corresponding author.

E-mail address: smikh@eimb.ru (S.N. Mikhailov).

<sup>1</sup>H and <sup>13</sup>C (with complete proton decoupling) NMR spectra were recorded on Bruker AMX 400 NMR instrument at 303 K relative to the residual solvent signals as internal standards (CDCl<sub>3</sub>, <sup>1</sup>H: δ = 7.26, <sup>13</sup>C: δ = 77.16; DMSO-*d*<sub>6</sub>, <sup>1</sup>H: δ = 2.50, <sup>13</sup>C: δ = 39.52; CD<sub>3</sub>OD, <sup>1</sup>H: δ = 3.31, <sup>13</sup>C: δ = 49.00). <sup>1</sup>H-NMR-spectra were recorded at 400 MHz and <sup>13</sup>C-NMR-spectra at 100 MHz.

High-resolution mass spectra (HRMS) were registered on a Bruker Daltonics micrOTOF-Q II instrument using electrospray ionization (ESI). The measurements were done in a positive ion mode. Interface capillary voltage: 4500 V; mass range from m/z 50 to 3000; external calibration (Electrospray Calibrant Solution, Fluka); nebulizer pressure: 0.4 Bar; flow rate: 3 μL/min; dry gas: nitrogen (4L/min); interface temperature: 200°C.

Samples were injected in to the mass spectrometer chamber from the Agilent 1260 HPLC system equipped with Agilent Poroshell 120 EC-C18 (3.0 × 50 mm; 2,7 μm) column; flow rate 200 μL/min; samples were injected from the acetonitrile-water (1:1) solution and were eluted in a linear gradient of acetonitrile concentrations (50 → 100%).

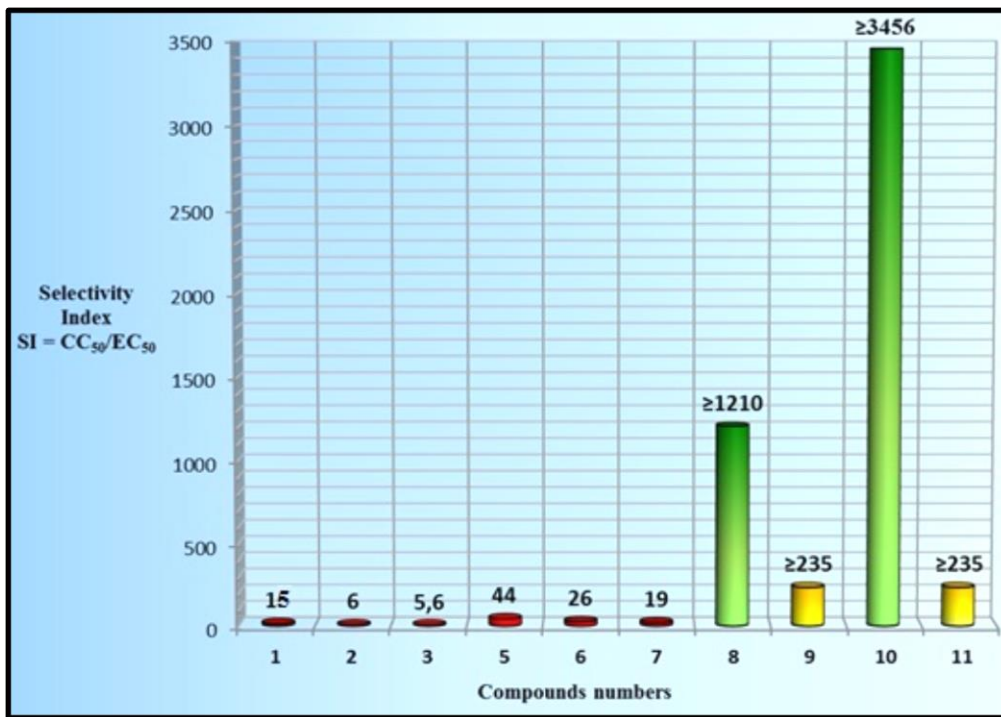

Alteration of selectivity index of  $N^6$ -benzyladenosine derivatives according to the modification on the phenyl ring

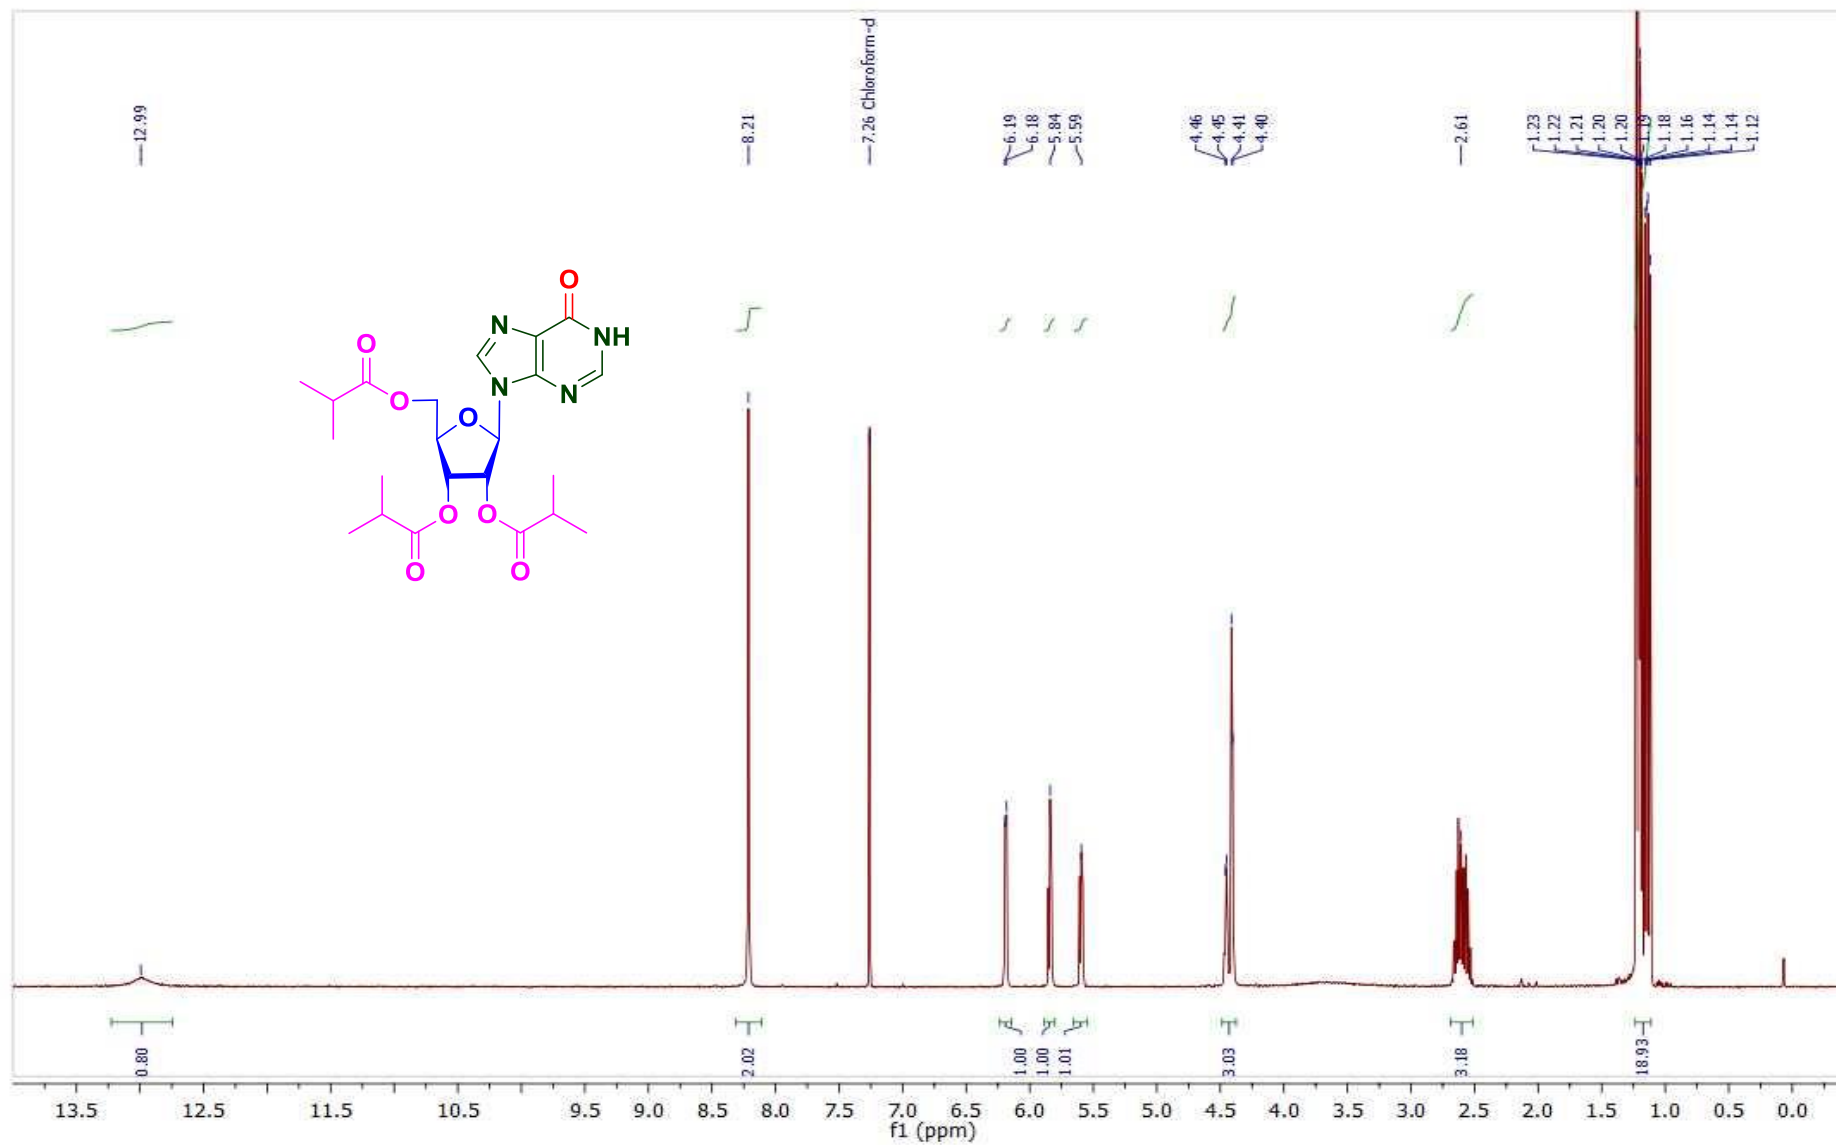

<sup>1</sup>H-NMR-spectrum (400 MHz) of 2',3',5'-tri-O-isobutyrylinosine in CDCl<sub>3</sub> at 303 K

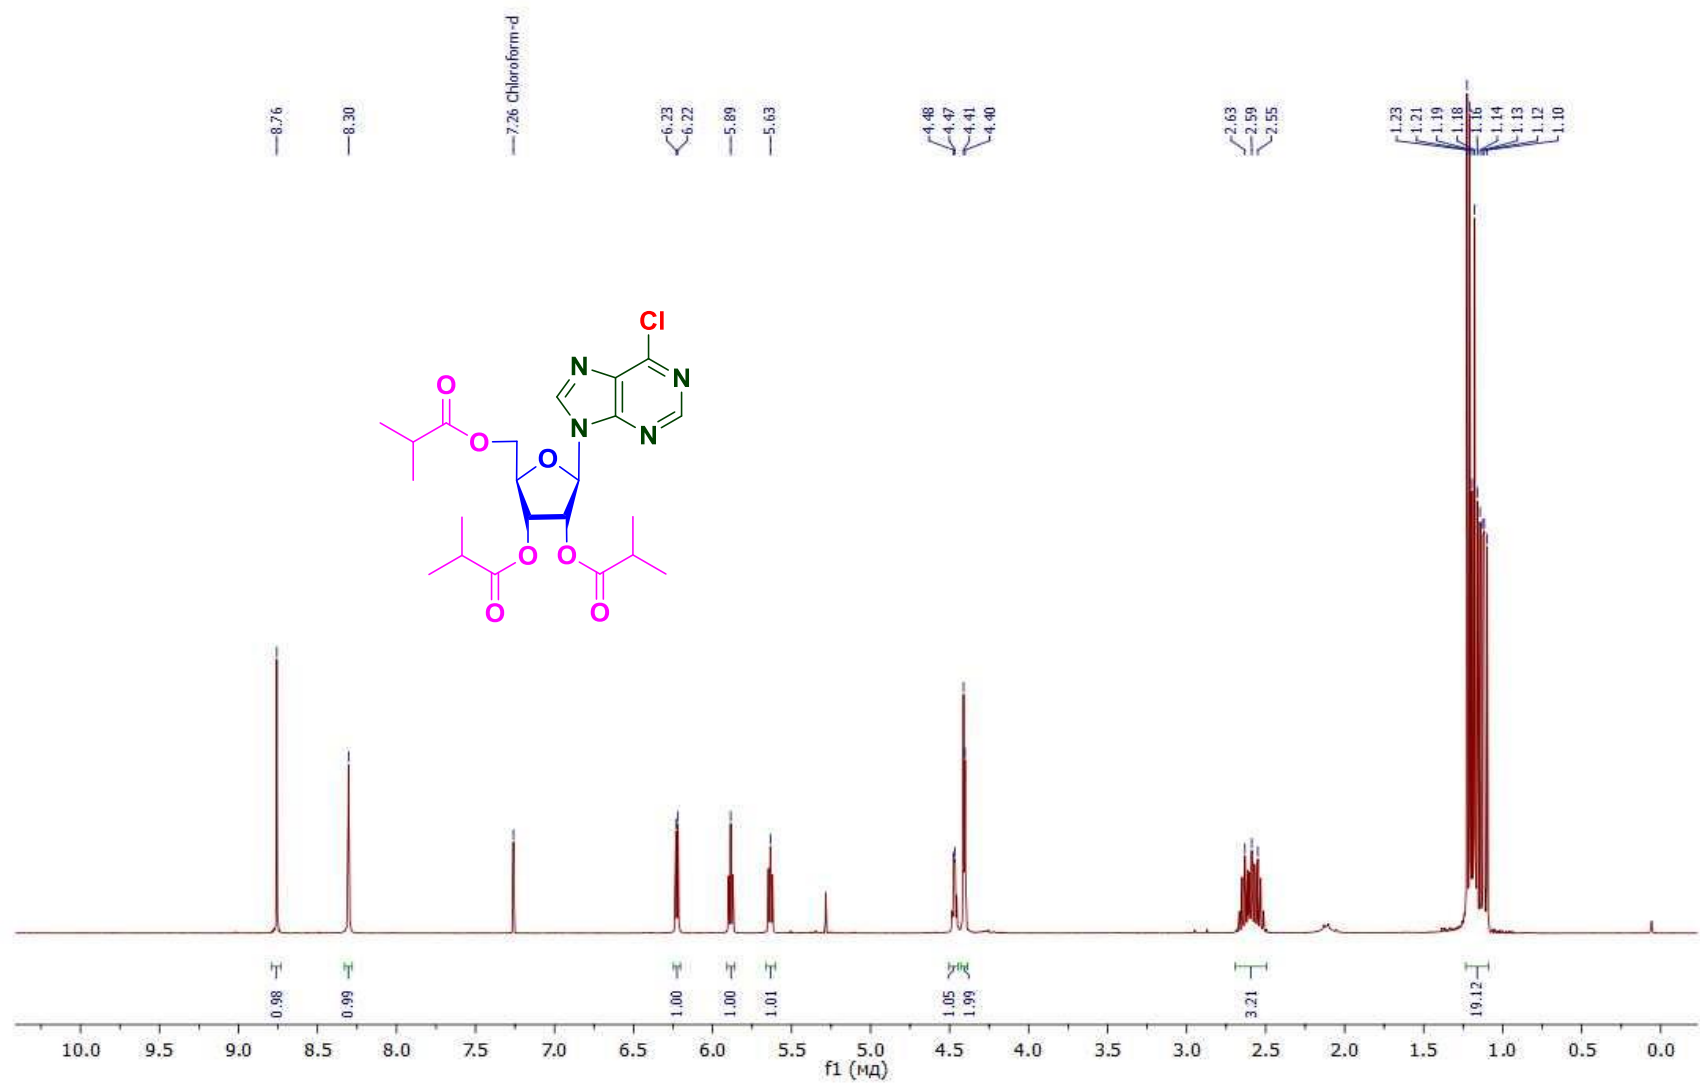

<sup>1</sup>H-NMR-spectrum (400 MHz) of 6-chloro-2',3',5'-tri-O-isobutyryladenine (4) in CDCl<sub>3</sub> at 303 K

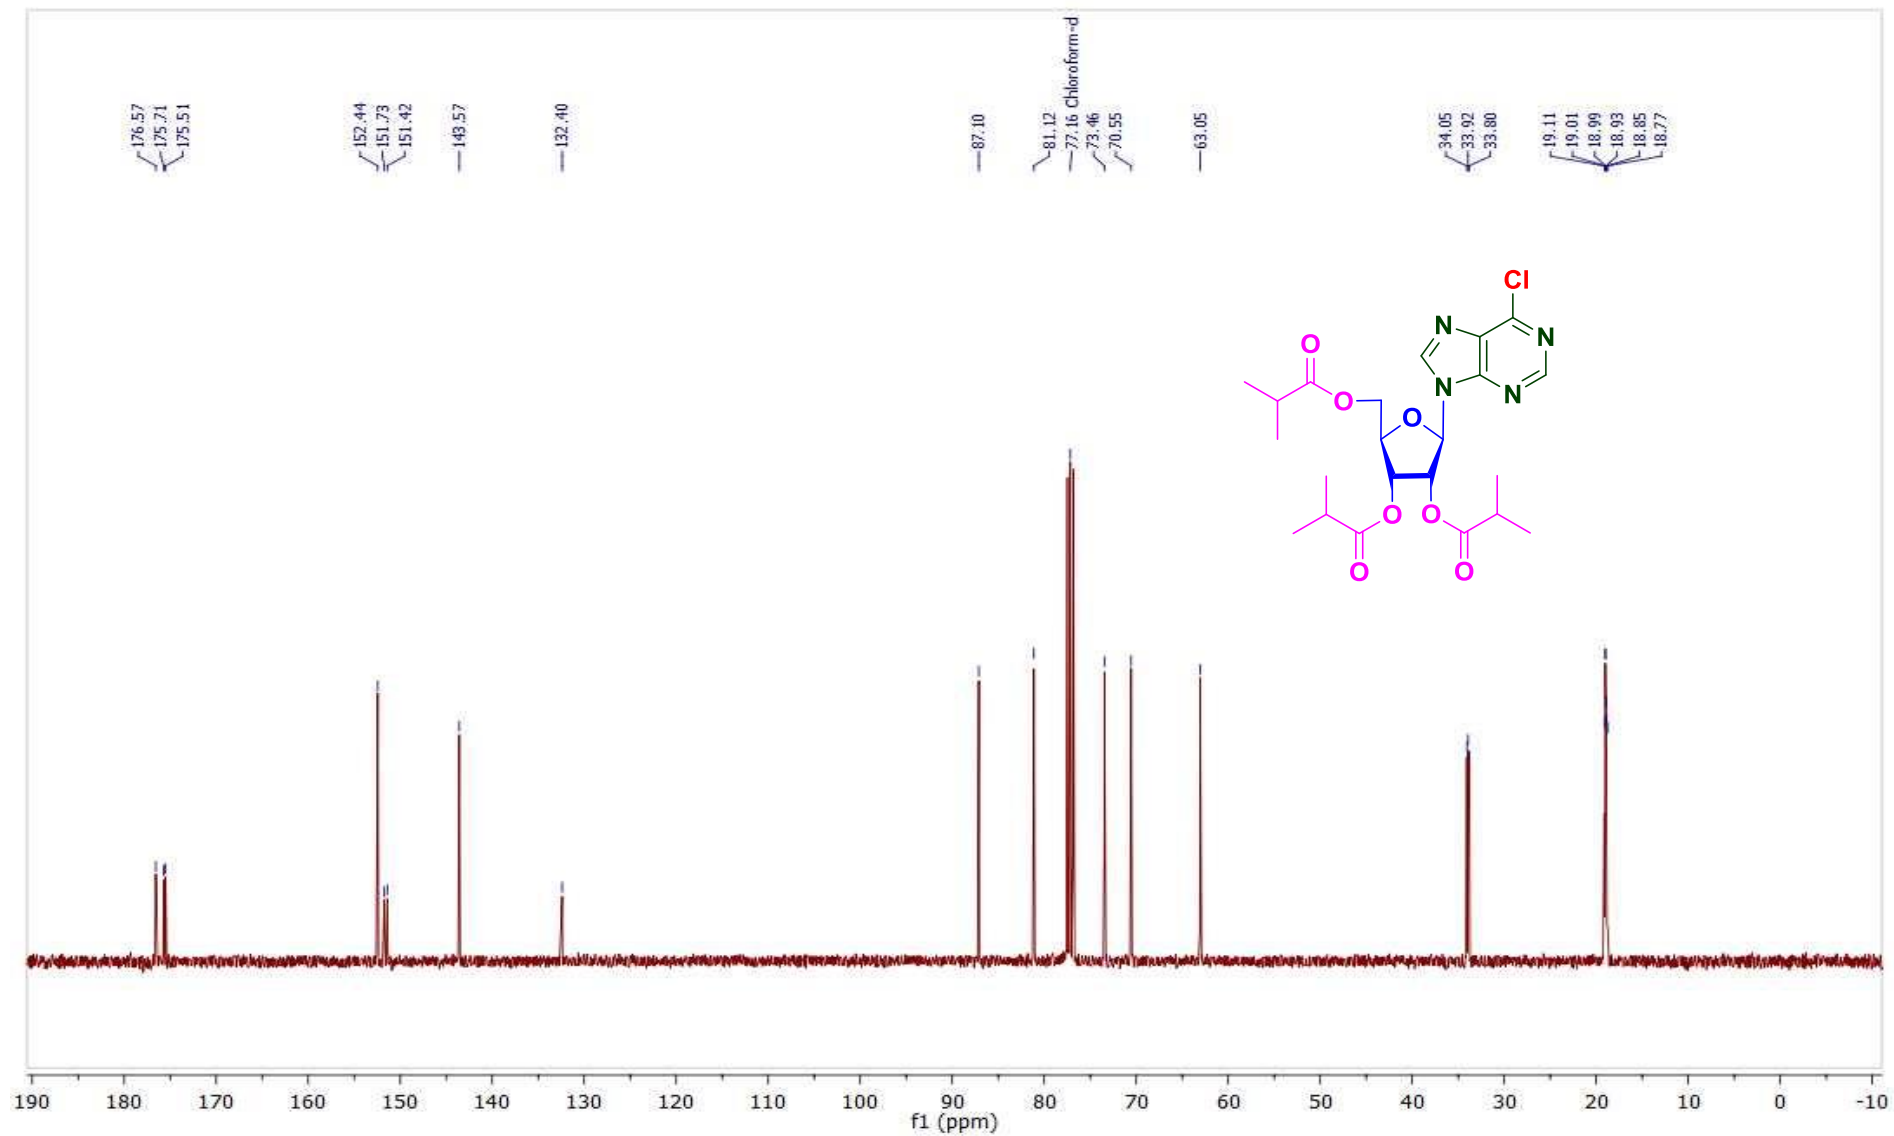

<sup>13</sup>C-NMR-spectrum (100 MHz) of 6-chloro-2',3',5'-tri-O-isobutyryladenine (**4**) in CDCl<sub>3</sub> at 303 K

### Acquisition Parameter

|             |          |                      |          |                  |           |
|-------------|----------|----------------------|----------|------------------|-----------|
| Source Type | ESI      | Ion Polarity         | Positive | Set Nebulizer    | 0.4 Bar   |
| Focus       | Active   | Set Capillary        | 4500 V   | Set Dry Heater   | 180 °C    |
| Scan Begin  | 50 m/z   | Set End Plate Offset | -500 V   | Set Dry Gas      | 6.0 l/min |
| Scan End    | 3000 m/z | Set Charging Voltage | 2000 V   | Set Divert Valve | Source    |
|             |          | Set Corona           | 0 nA     | Set APCI Heater  | 0 °C      |

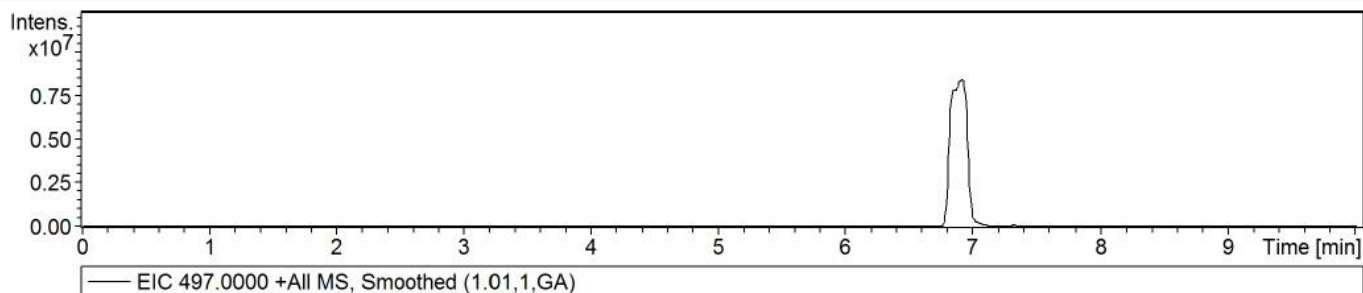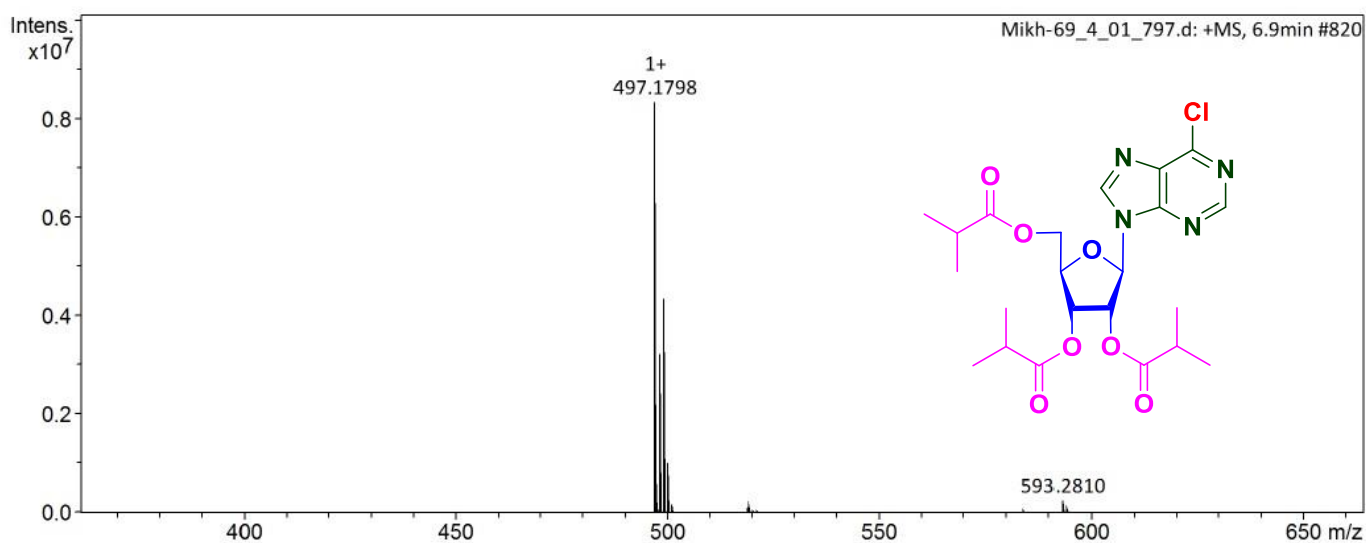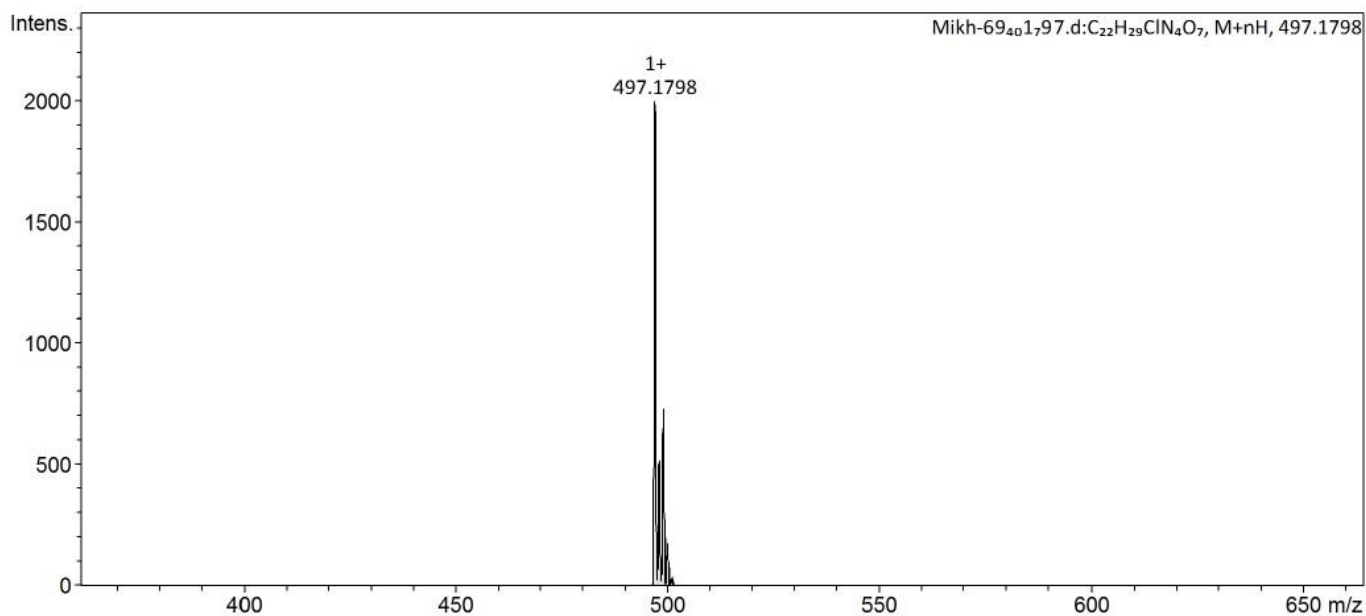

High-resolution mass spectrum (HRMS) of 6-chloro-2',3',5'-tri-O-isobutyryladenine (**4**)

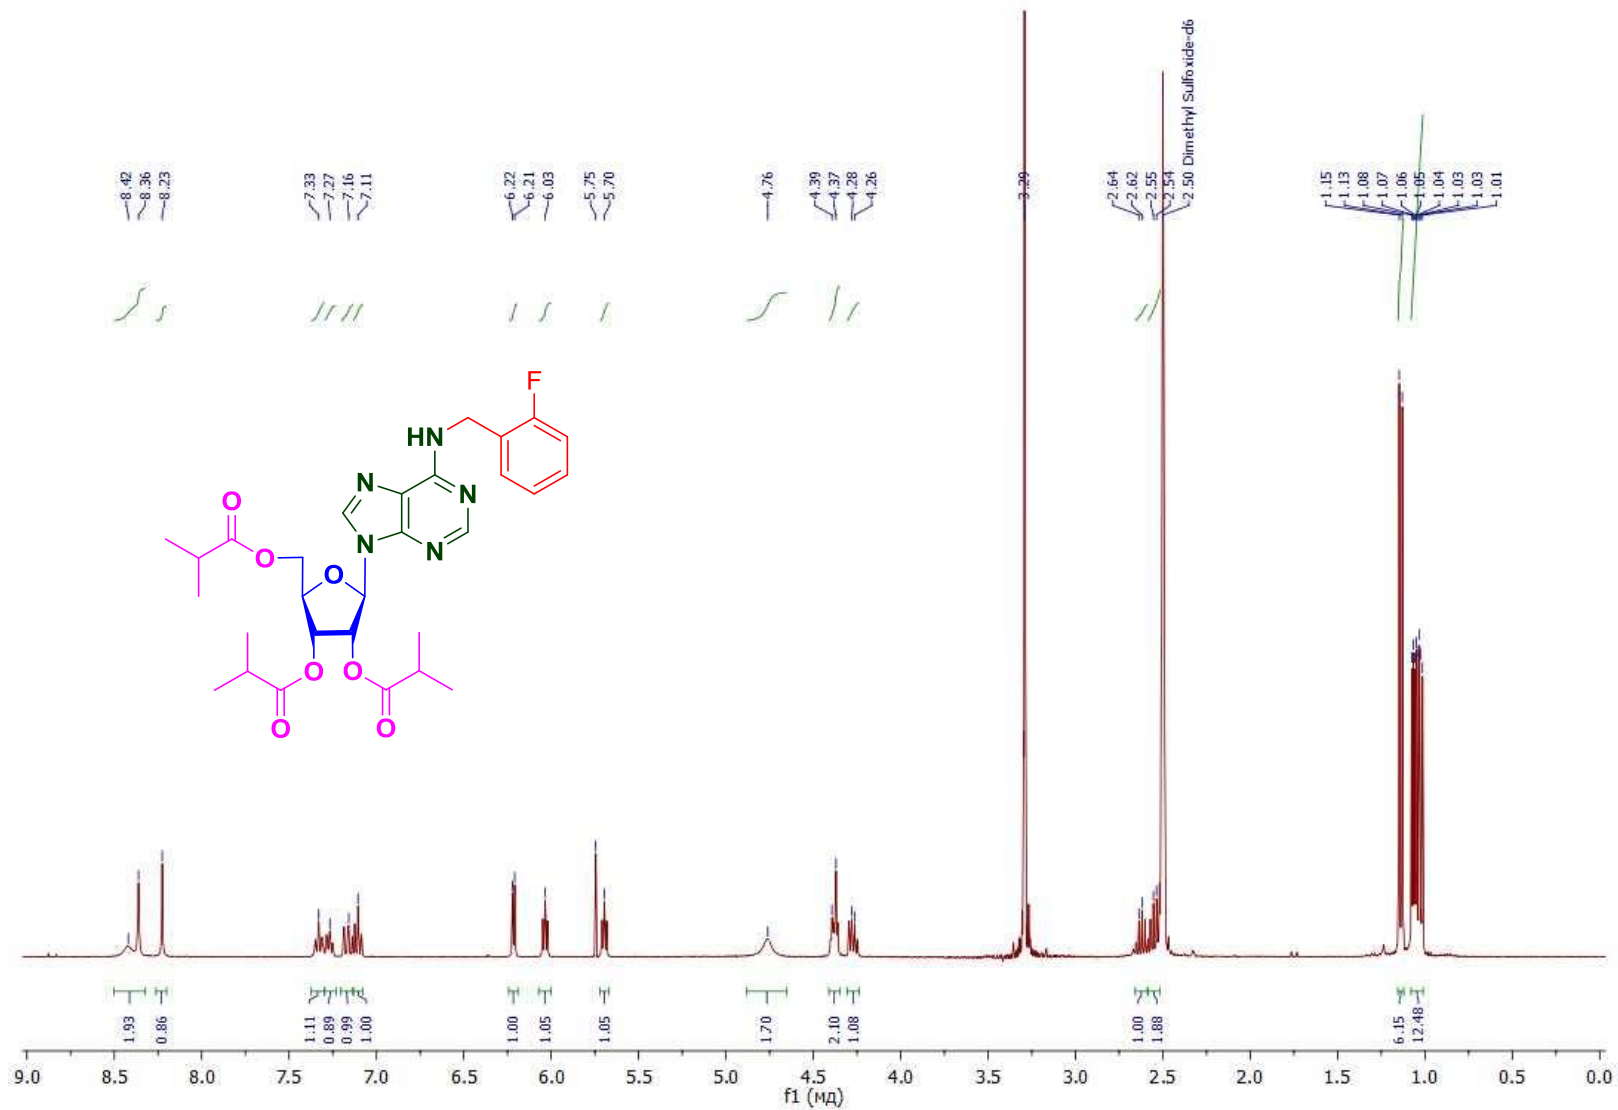

$^1\text{H-NMR}$ -spectrum (400 MHz) of  $N^6$ -(2-fluorobenzyl)-2',3',5'-tri-O-isobutyryladenine in  $\text{DMSO-}d_6$  at 303 K

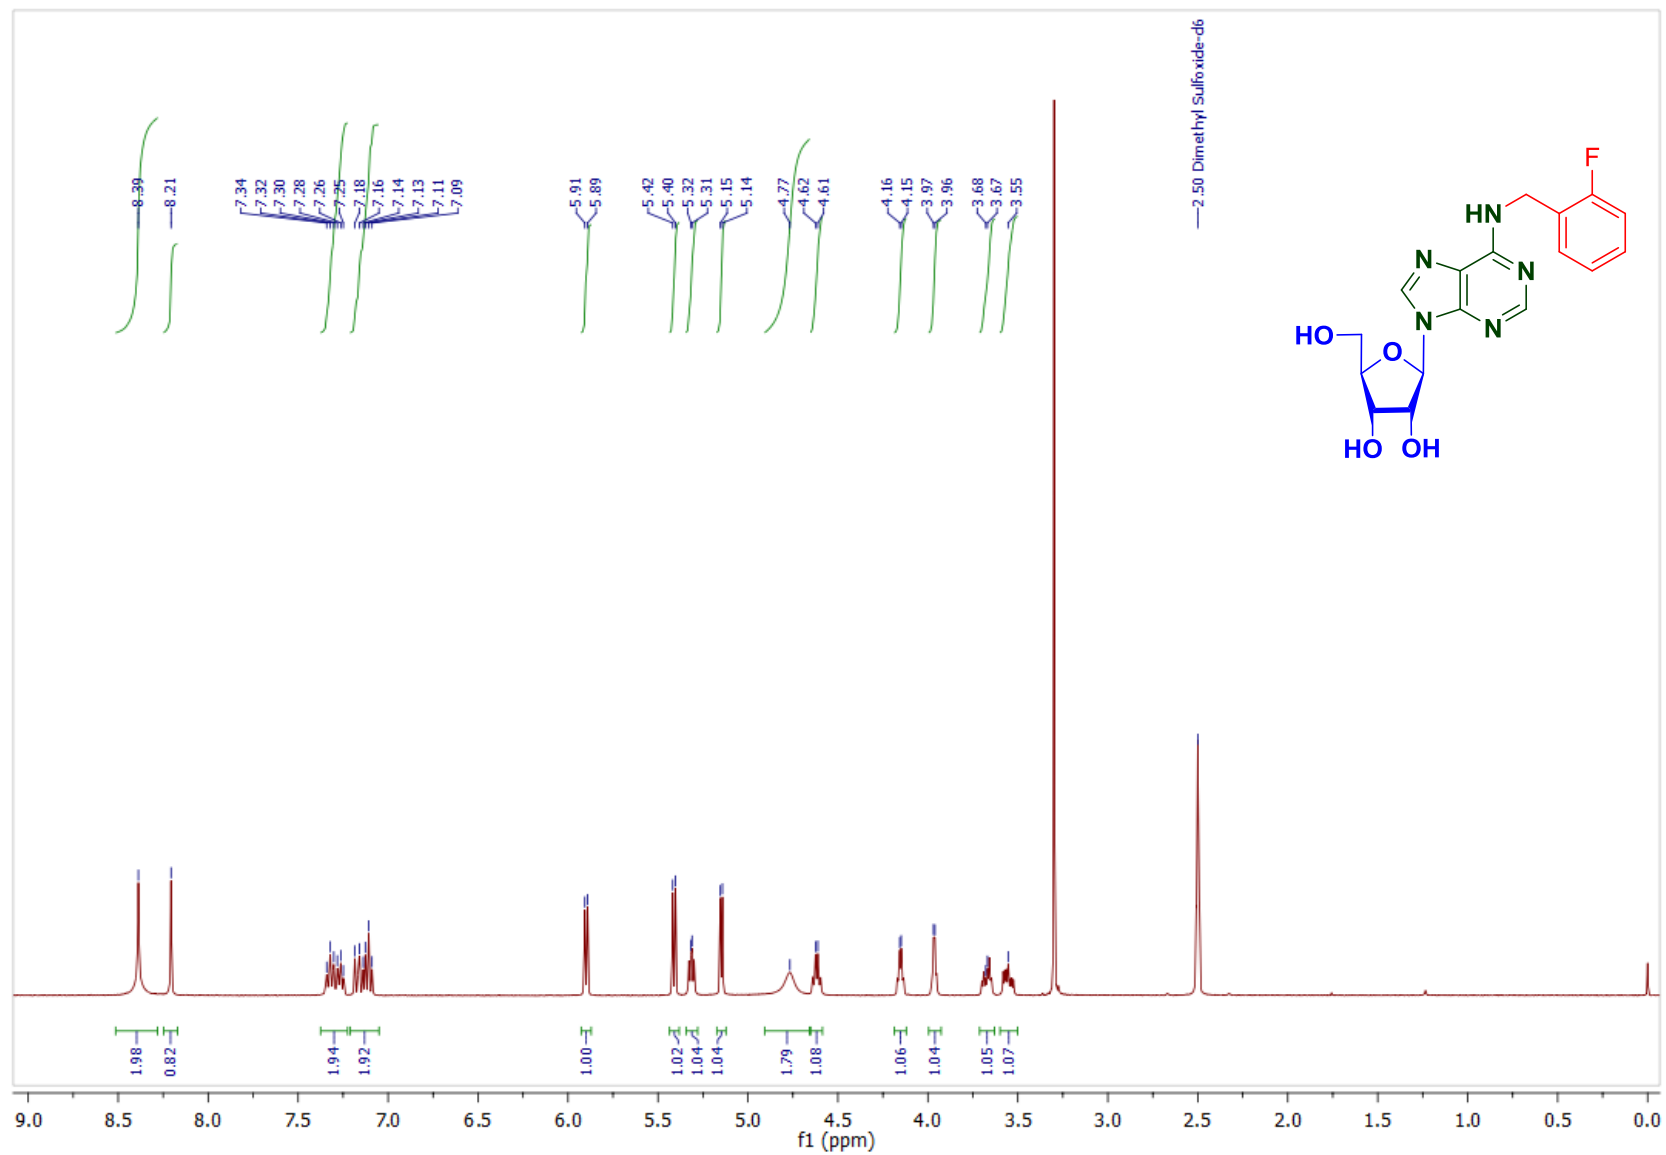

<sup>1</sup>H-NMR-spectrum (400 MHz) of *N*<sup>6</sup>-(2-fluorobenzyl)-adenosine (**5**) in DMSO-*d*<sub>6</sub> at 303 K



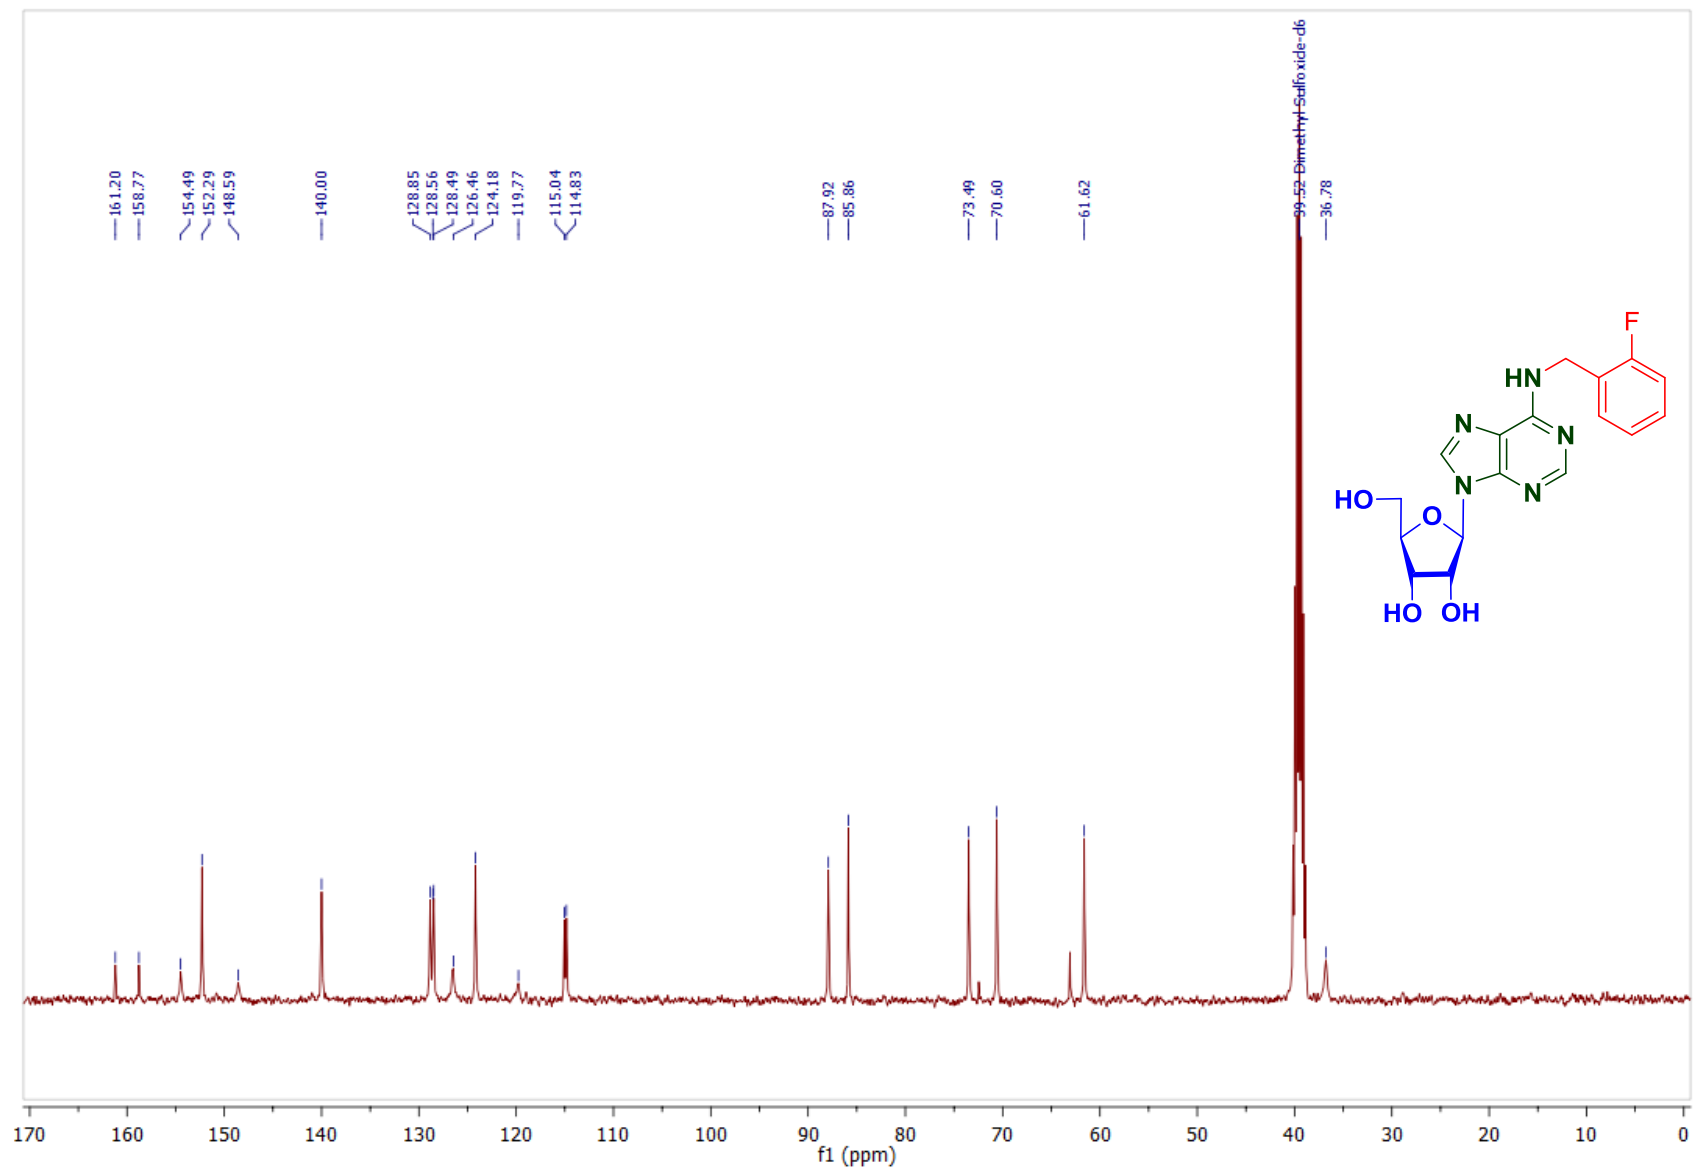

<sup>13</sup>C-NMR-spectrum (100 MHz) of *N*<sup>6</sup>-(2-fluorobenzyl)-adenosine (**5**) in DMSO-*d*<sub>6</sub> at 303 K

### Acquisition Parameter

|             |          |                      |          |                  |           |
|-------------|----------|----------------------|----------|------------------|-----------|
| Source Type | ESI      | Ion Polarity         | Positive | Set Nebulizer    | 0.4 Bar   |
| Focus       | Active   | Set Capillary        | 4500 V   | Set Dry Heater   | 200 °C    |
| Scan Begin  | 50 m/z   | Set End Plate Offset | -500 V   | Set Dry Gas      | 4.0 l/min |
| Scan End    | 3000 m/z | Set Charging Voltage | 2000 V   | Set Divert Valve | Source    |
|             |          | Set Corona           | 0 nA     | Set APCI Heater  | 0 °C      |

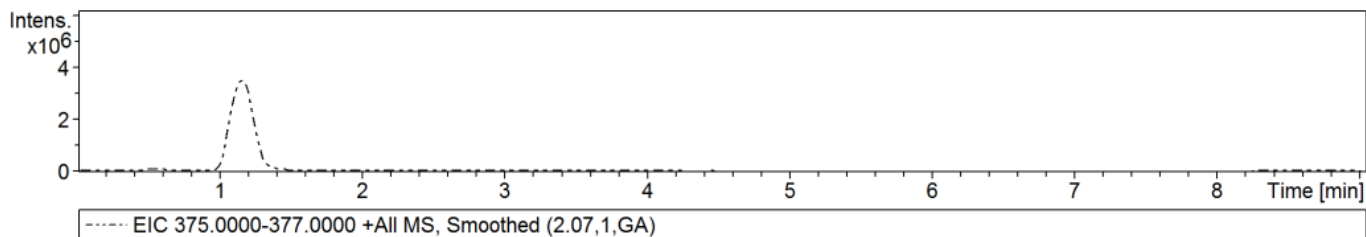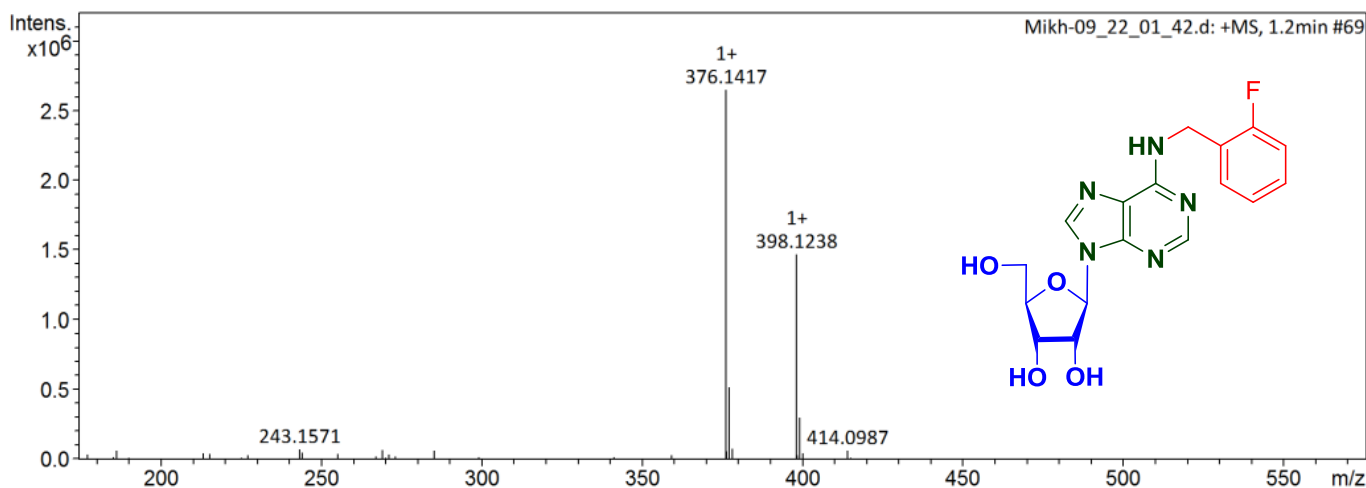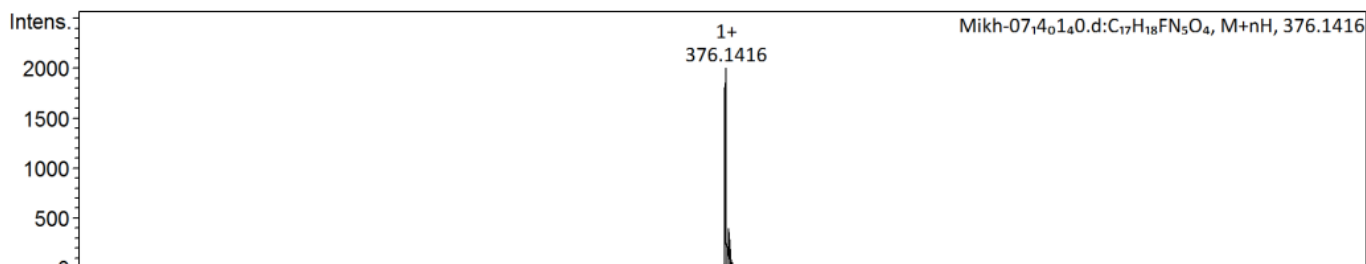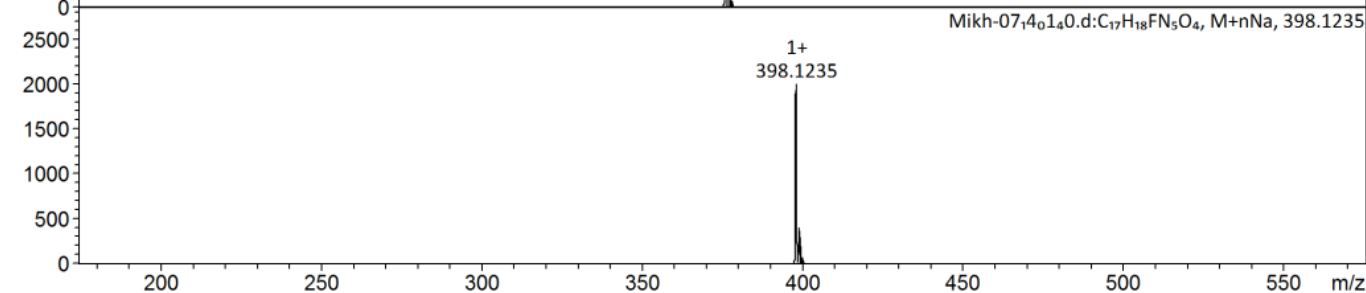

High-resolution mass spectrum (HRMS) of *N*<sup>6</sup>-(2-fluorobenzyl)-adenosine (**5**)

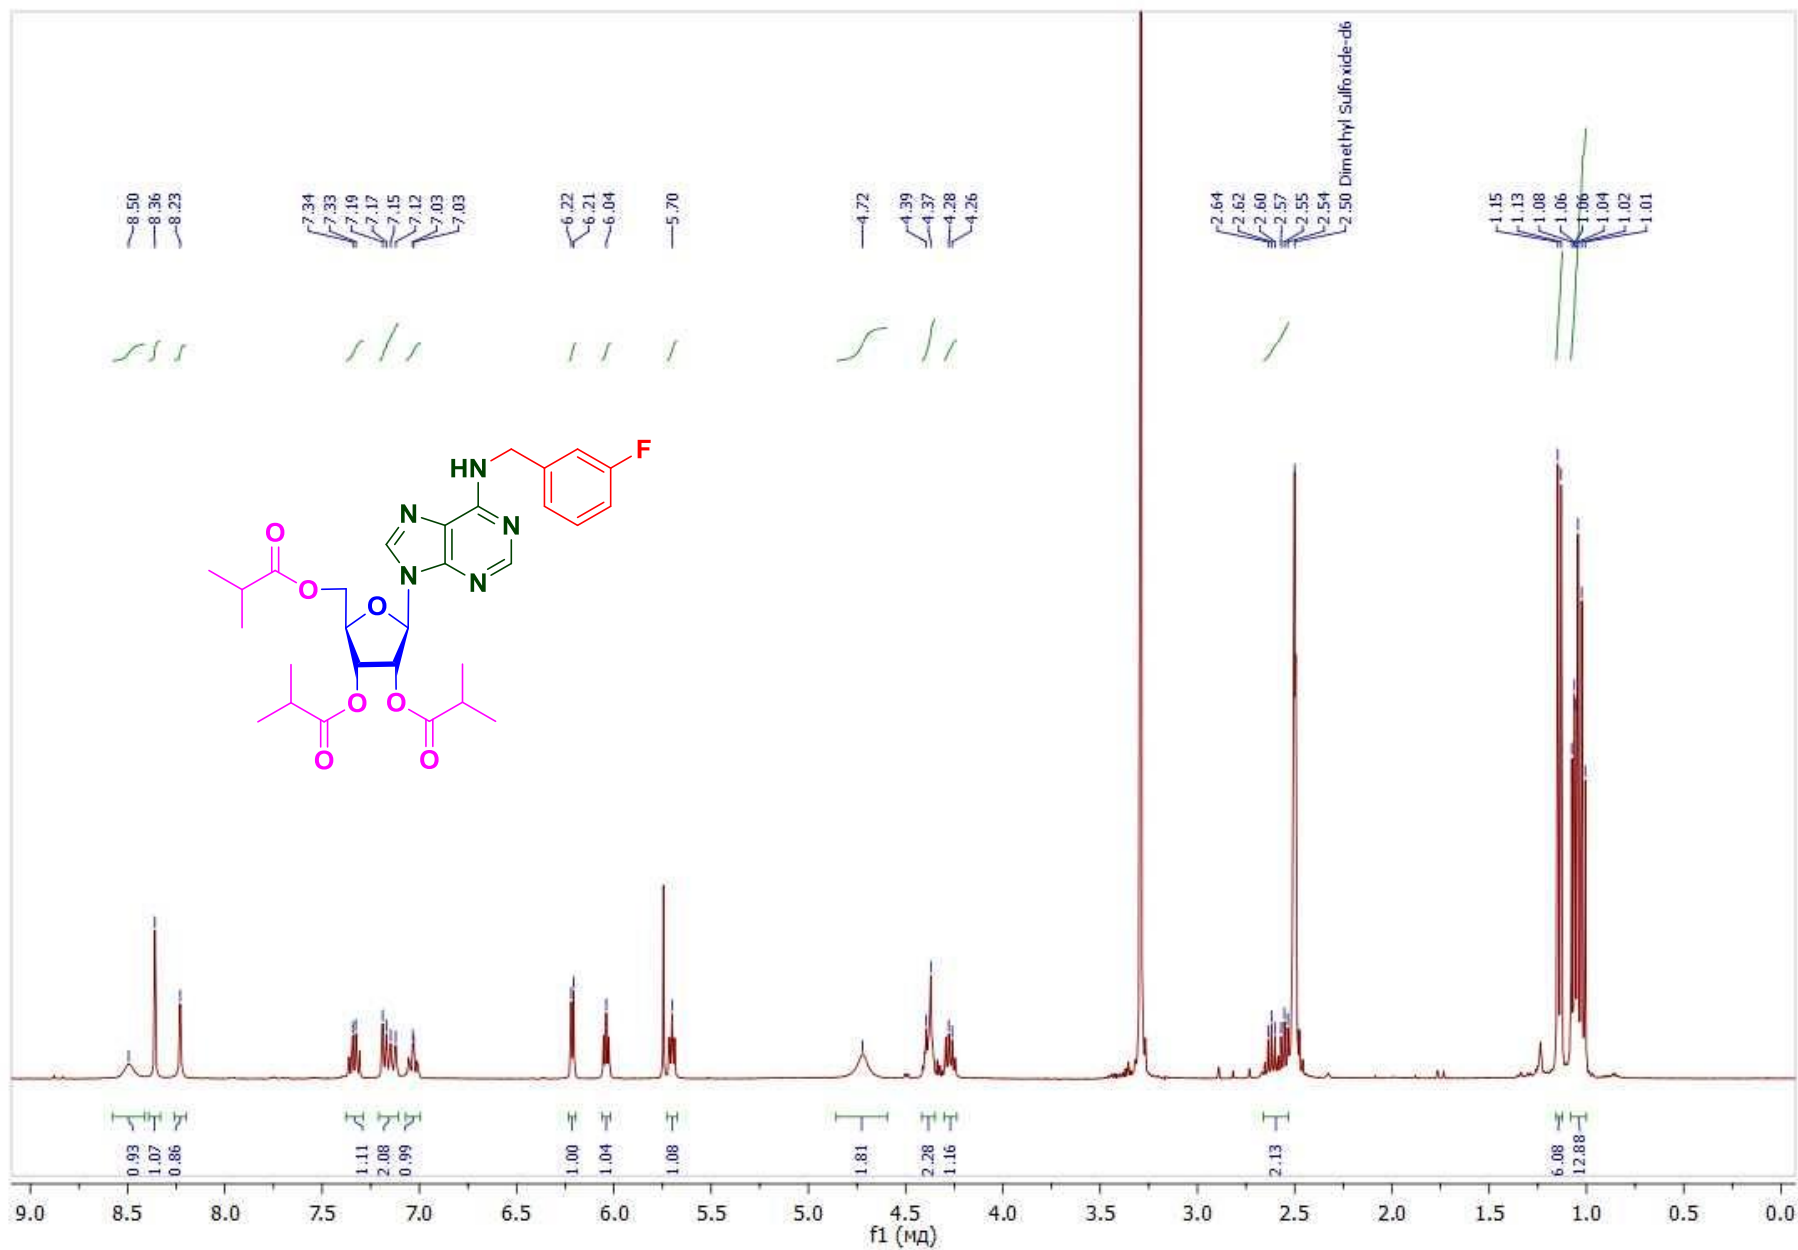

<sup>1</sup>H-NMR-spectrum (400 MHz) of *N*<sup>6</sup>-(3-fluorobenzyl)-2',3',5'-tri-*O*-isobutyryladenine in DMSO-*d*<sub>6</sub> at 303 K

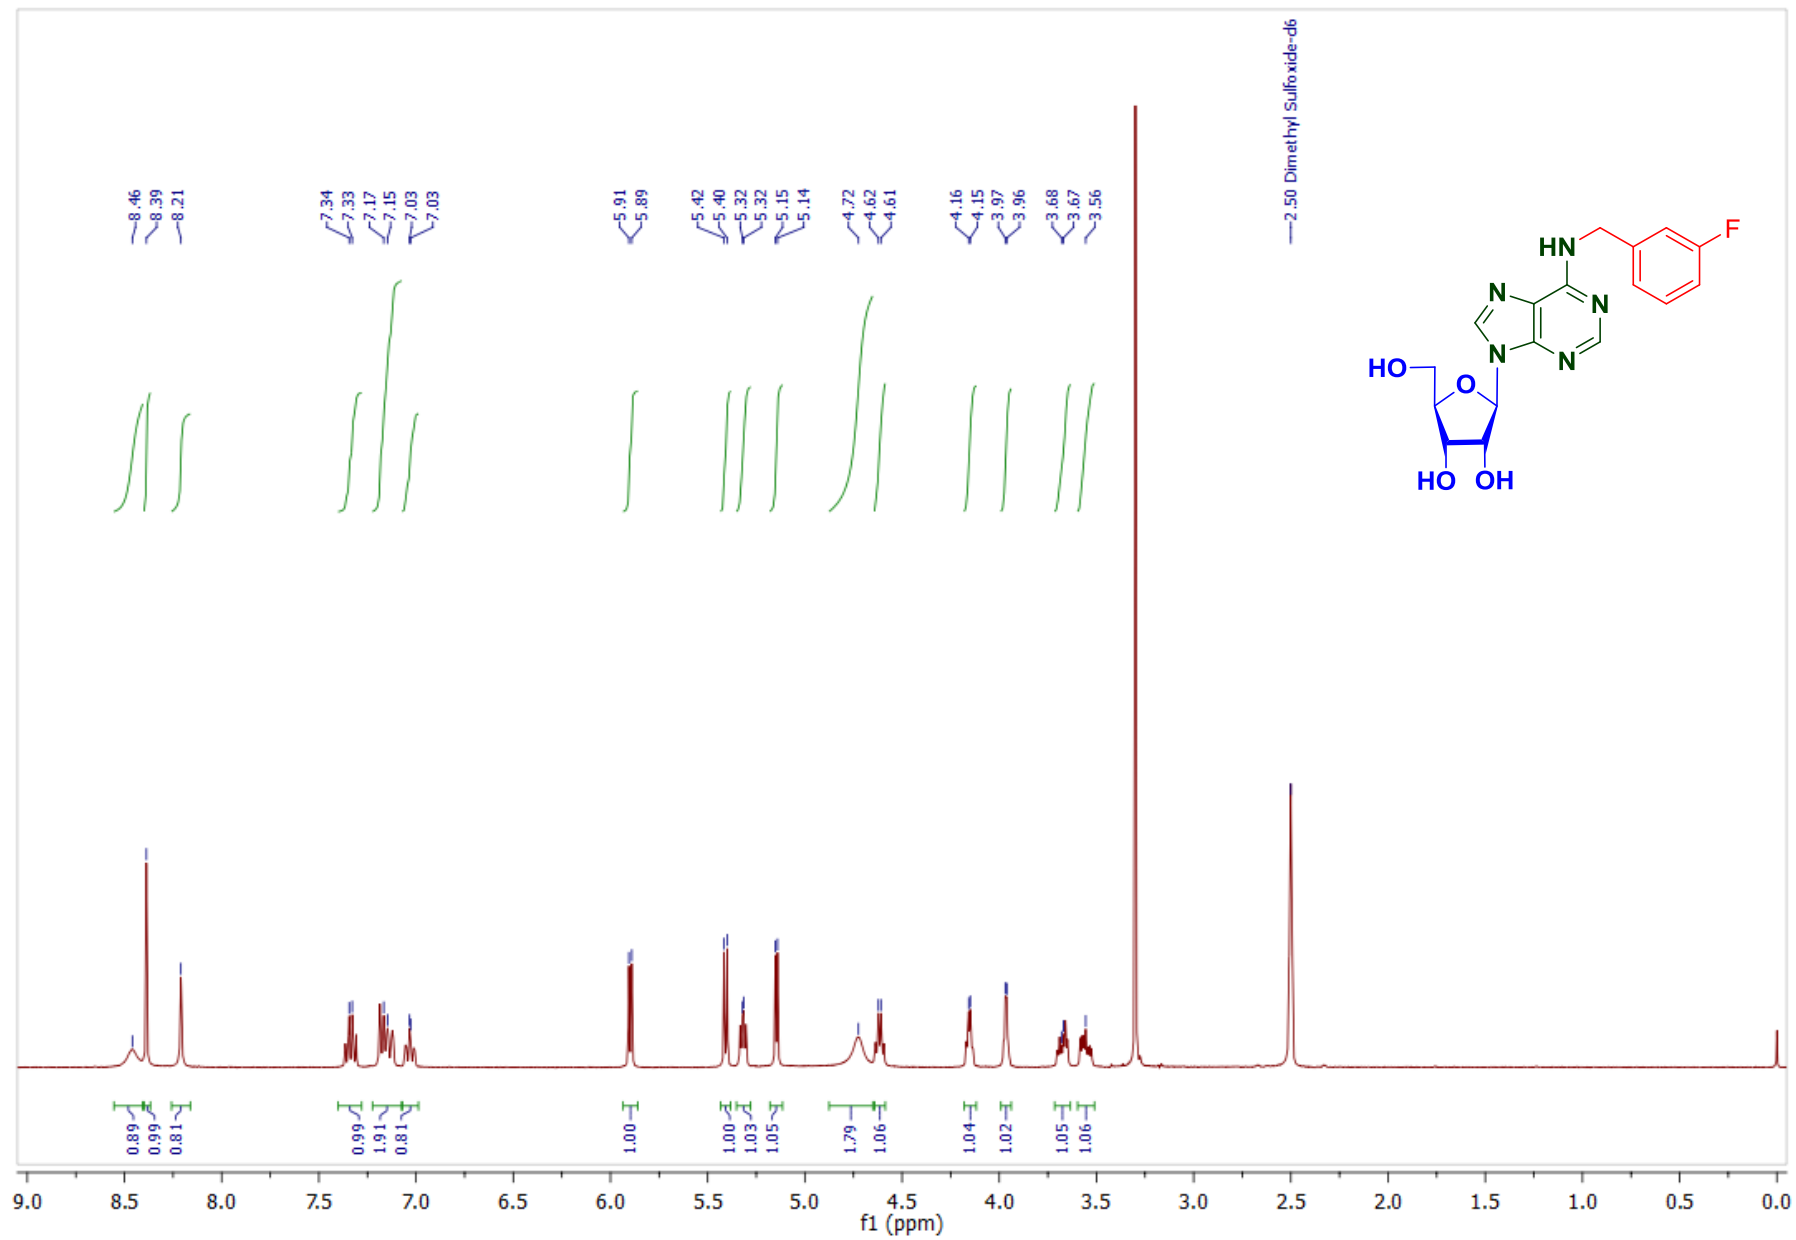

$^1\text{H-NMR}$ -spectrum (400 MHz) of  $N^6$ -(3-fluorobenzyl)adenosine (6) in  $\text{DMSO-}d_6$  at 303 K

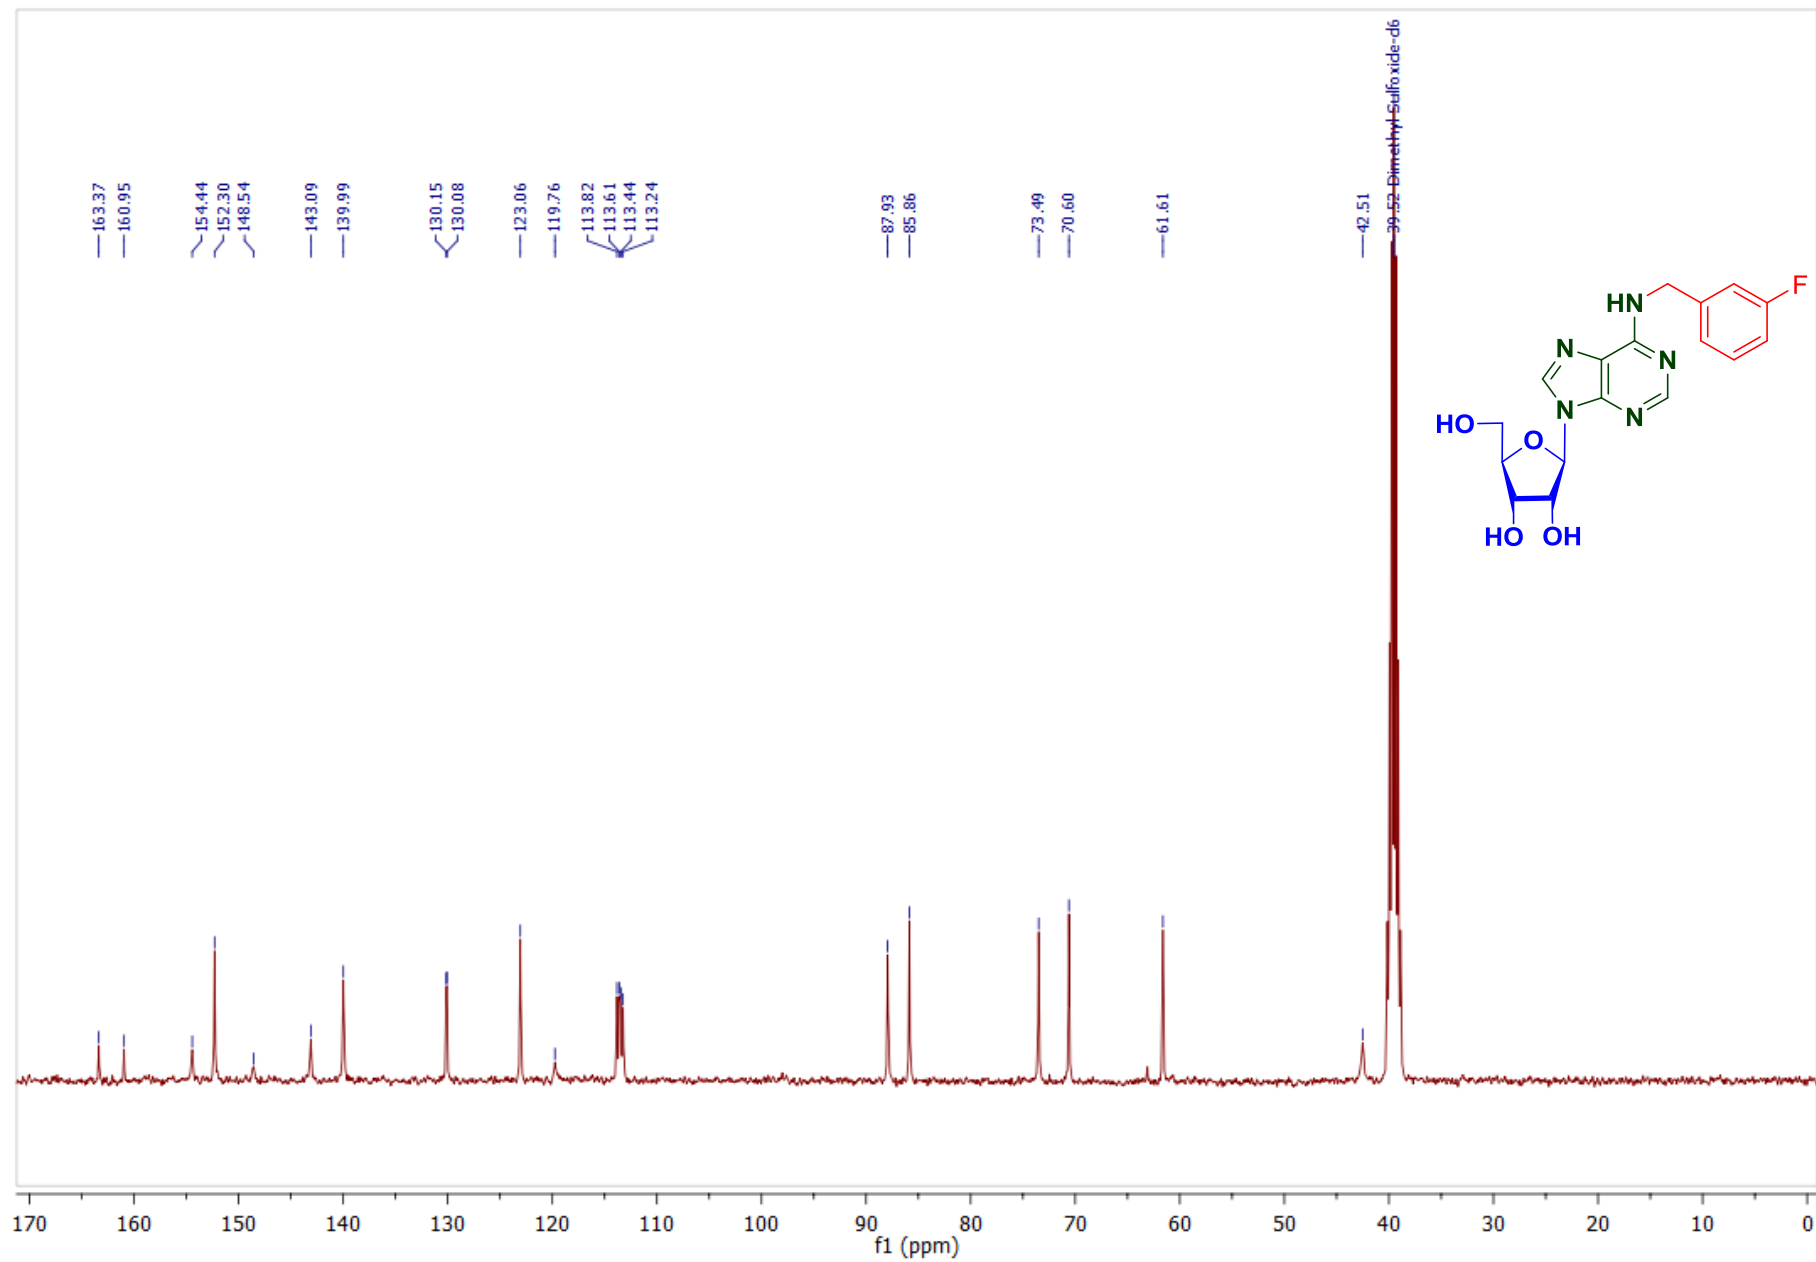

$^{13}\text{C}$ -NMR-spectrum (100 MHz) of  $N^6$ -(3-fluorobenzyl)-adenosine (**6**) in  $\text{DMSO-}d_6$  at 303 K

### Acquisition Parameter

|             |          |                      |          |                  |           |
|-------------|----------|----------------------|----------|------------------|-----------|
| Source Type | ESI      | Ion Polarity         | Positive | Set Nebulizer    | 0.4 Bar   |
| Focus       | Active   | Set Capillary        | 4500 V   | Set Dry Heater   | 200 °C    |
| Scan Begin  | 50 m/z   | Set End Plate Offset | -500 V   | Set Dry Gas      | 4.0 l/min |
| Scan End    | 3000 m/z | Set Charging Voltage | 2000 V   | Set Divert Valve | Source    |
|             |          | Set Corona           | 0 nA     | Set APCI Heater  | 0 °C      |

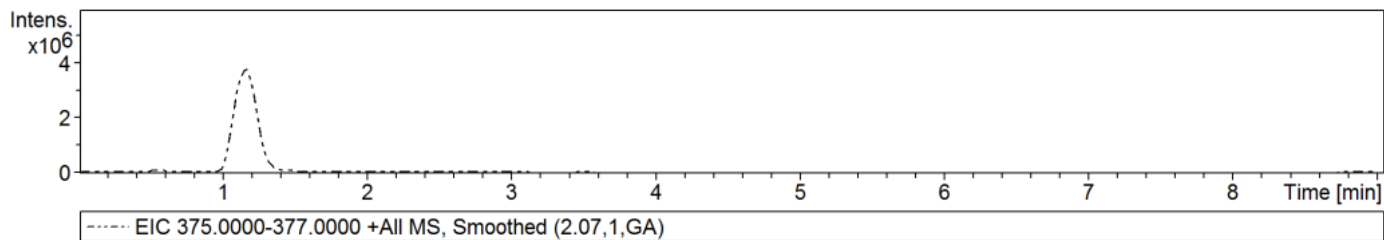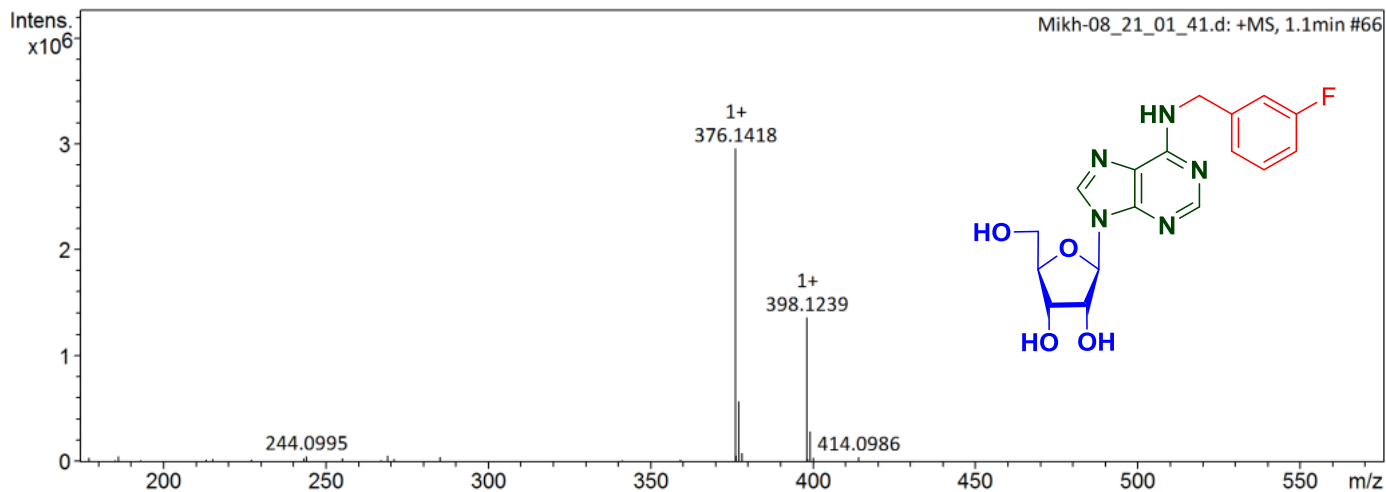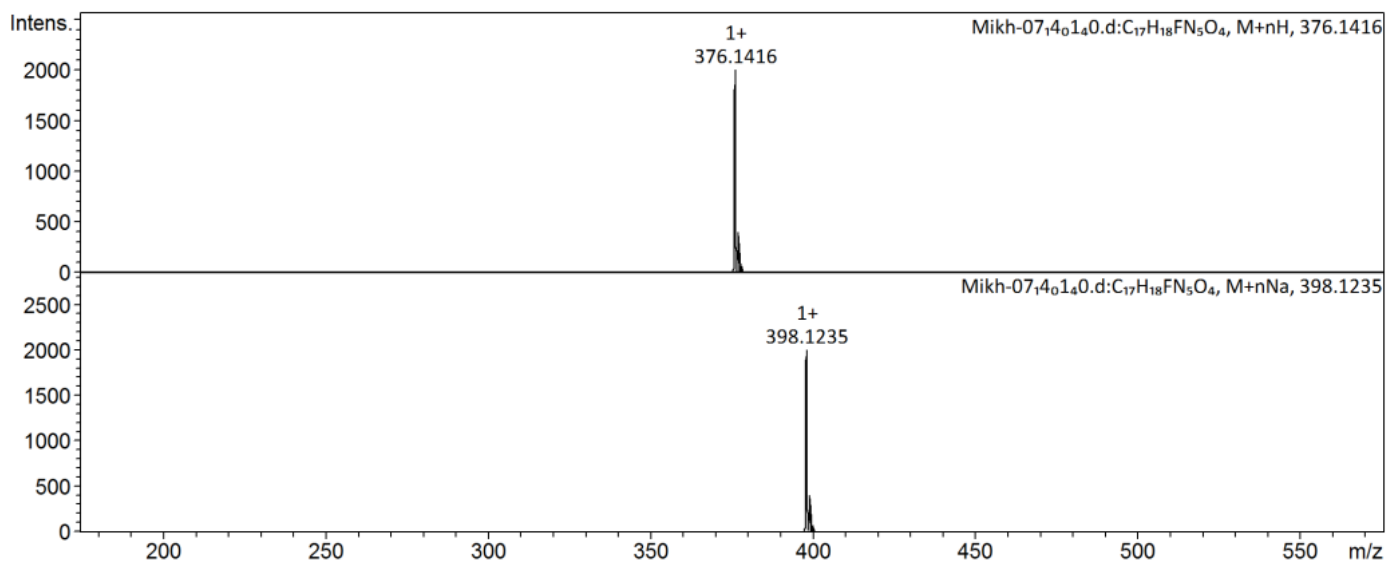

High-resolution mass spectrum (HRMS) of *N*<sup>6</sup>-(3-fluorobenzyl)-adenosine (**6**)

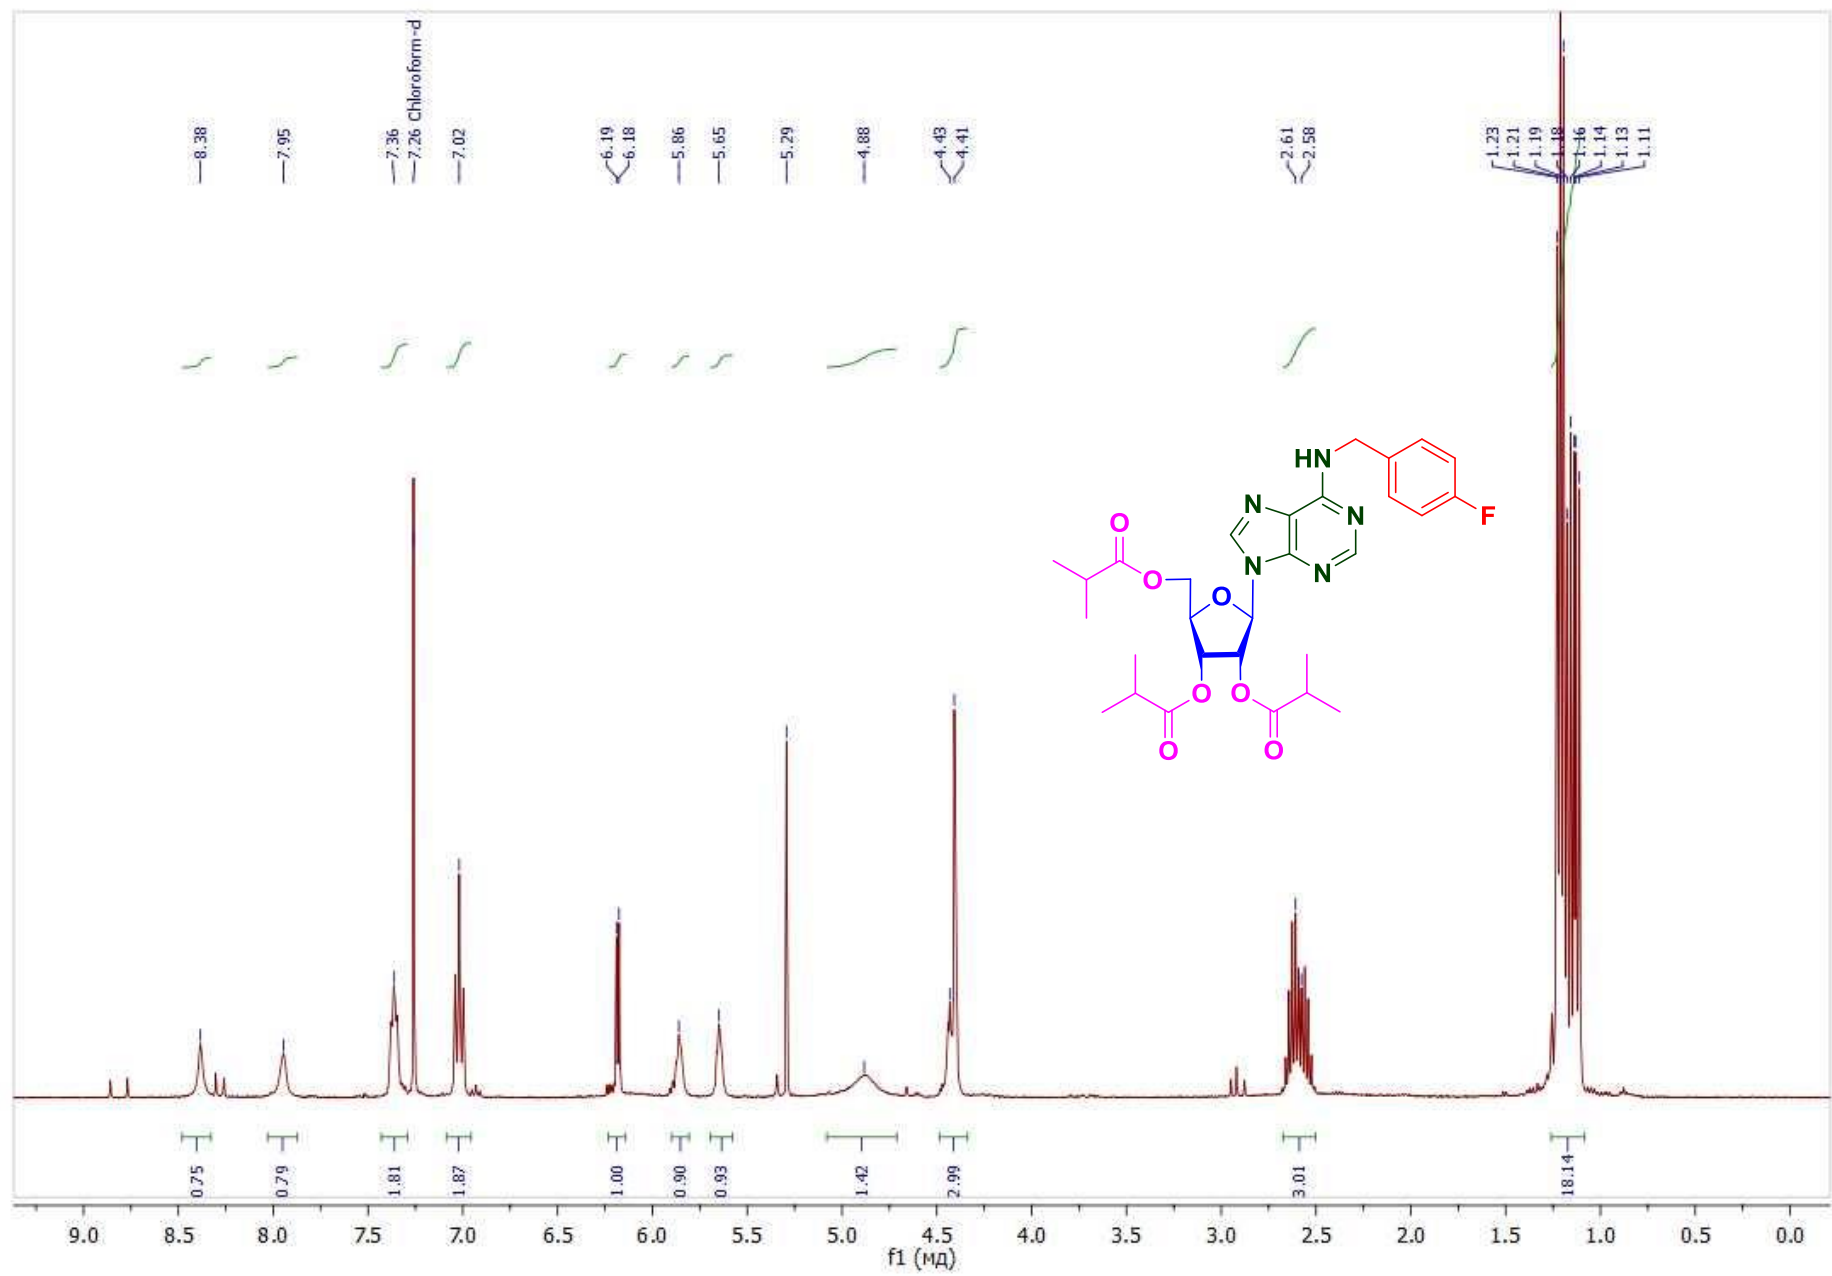

<sup>1</sup>H-NMR-spectrum (400 MHz) of *N*<sup>6</sup>-(4-fluorobenzyl)-2',3',5'-tri-*O*-isobutyryladenine in CDCl<sub>3</sub> at 303 K

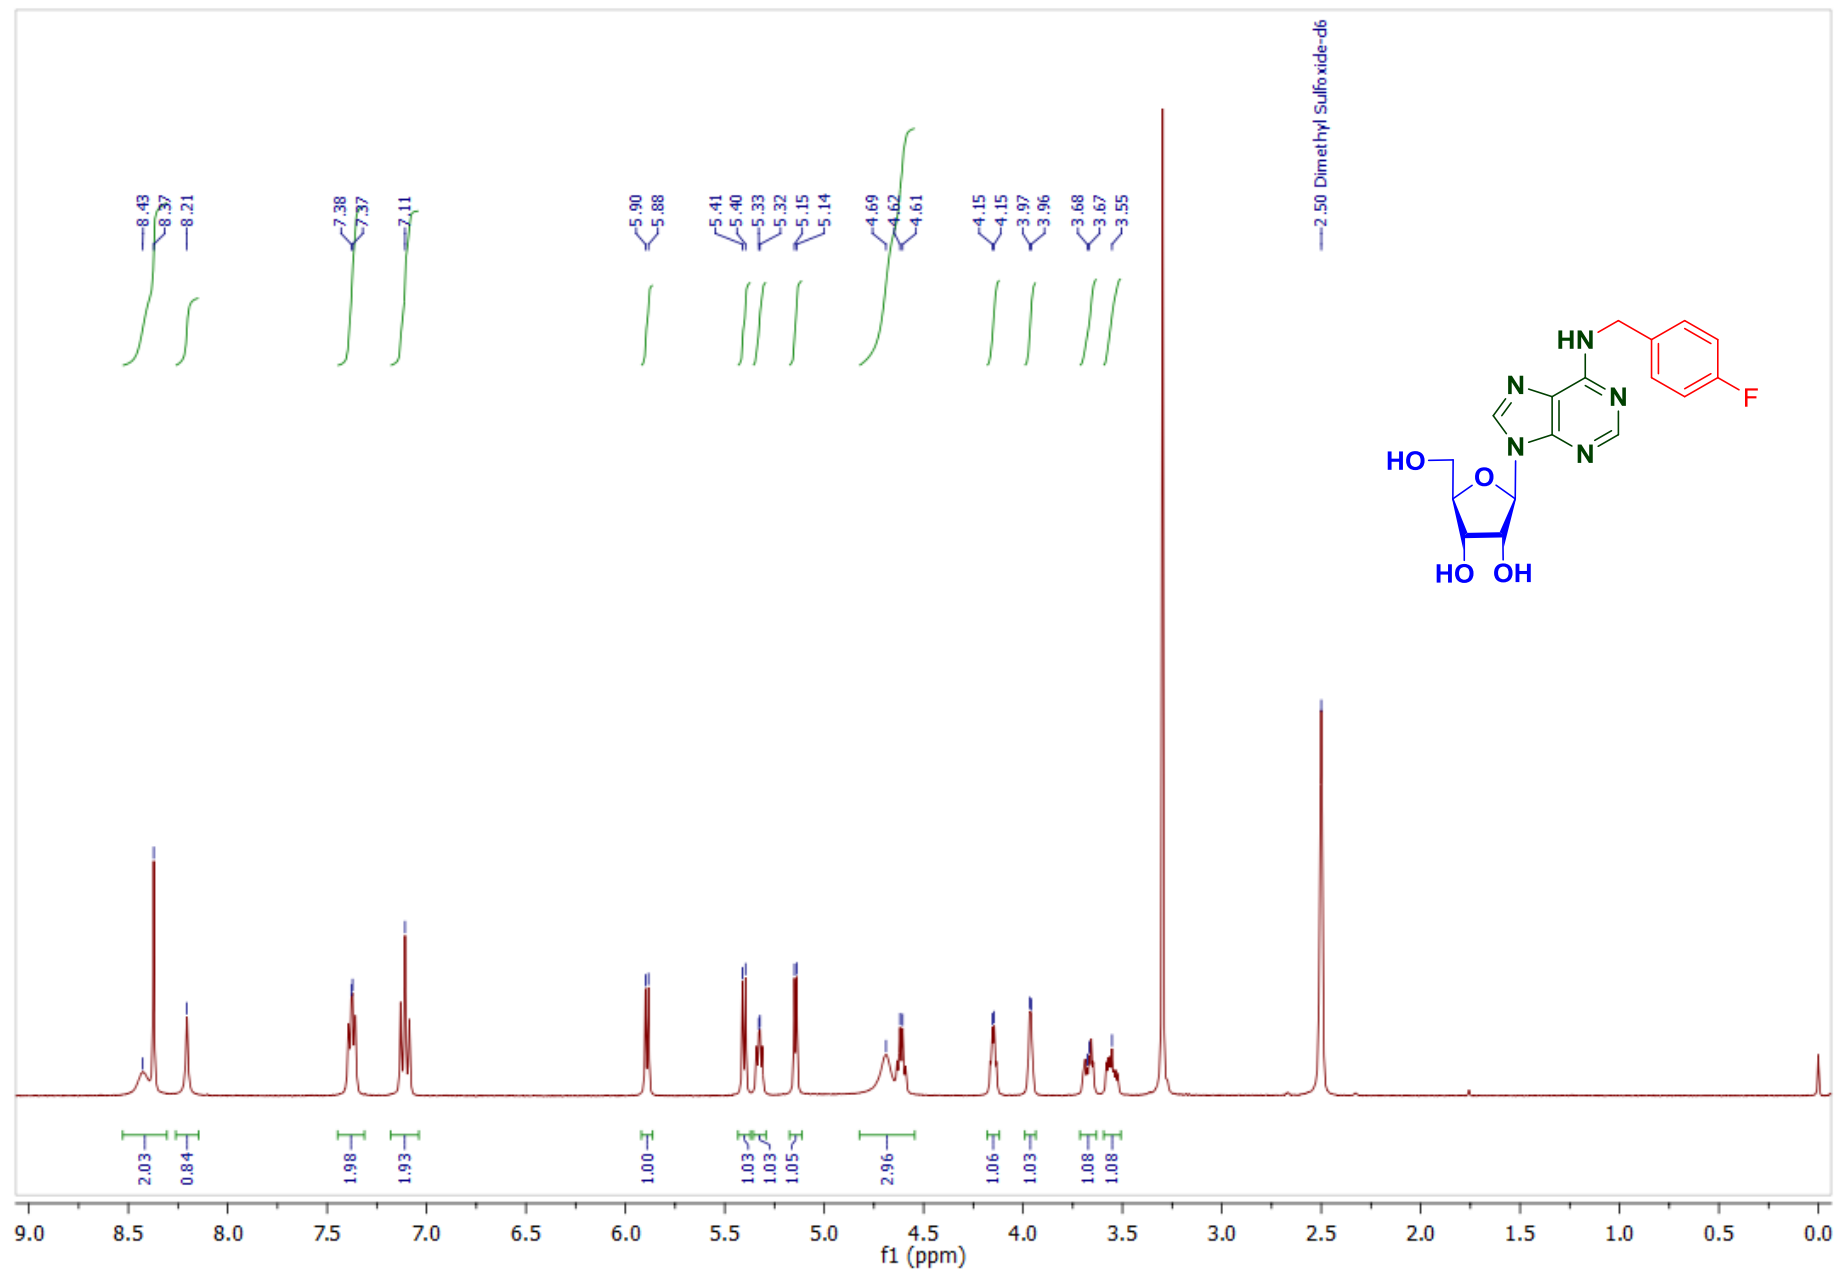

$^1\text{H-NMR}$ -spectrum (400 MHz) of  $N^6$ -(4-fluorobenzyl)-adenosine (7) in  $\text{DMSO-}d_6$  at 303 K



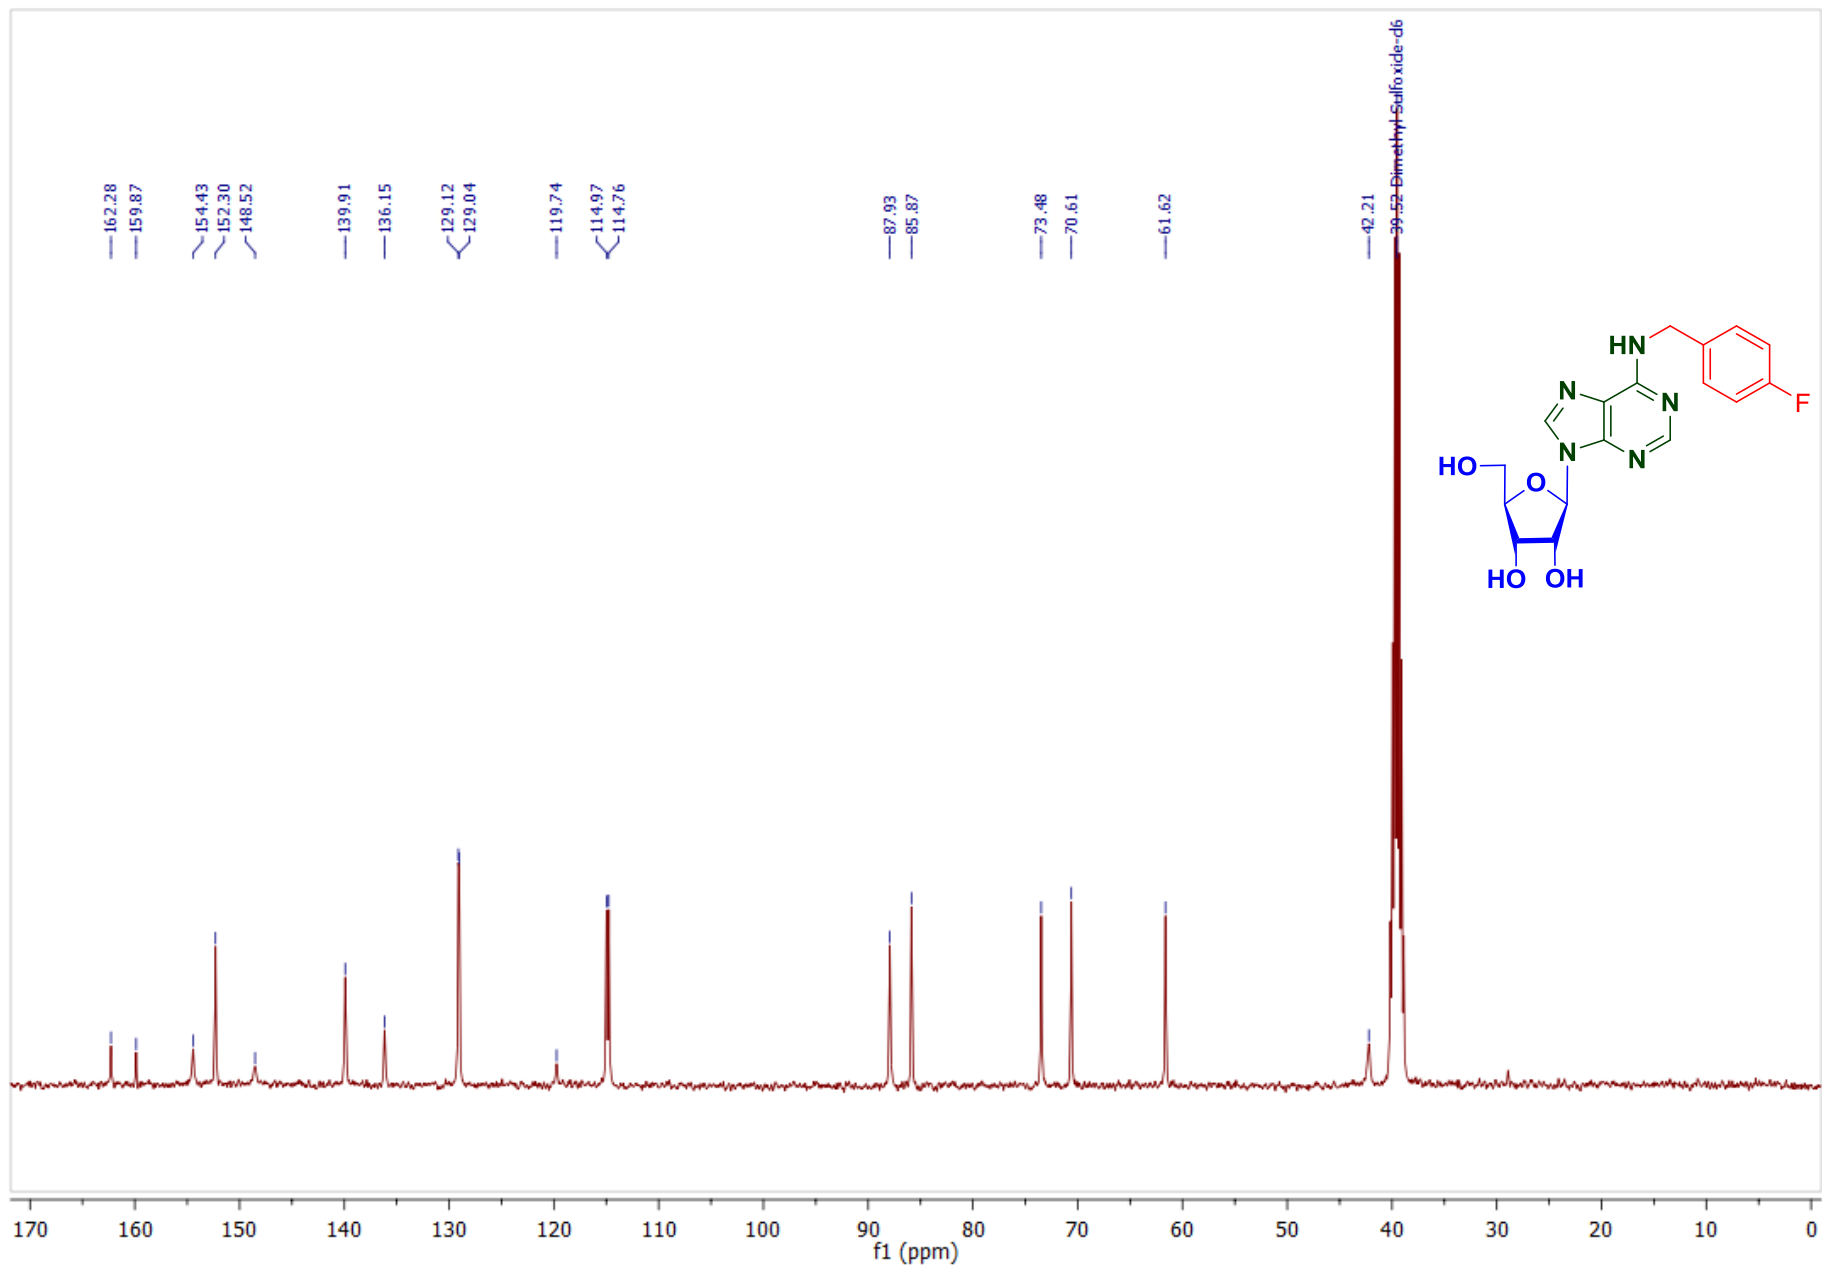

$^{13}\text{C}$ -NMR-spectrum (100 MHz) of  $N^6$ -(4-fluorobenzyl)-adenosine (7) in  $\text{DMSO-}d_6$  at 303 K

### Acquisition Parameter

|             |          |                      |          |                  |           |
|-------------|----------|----------------------|----------|------------------|-----------|
| Source Type | ESI      | Ion Polarity         | Positive | Set Nebulizer    | 0.4 Bar   |
| Focus       | Active   | Set Capillary        | 4500 V   | Set Dry Heater   | 200 °C    |
| Scan Begin  | 50 m/z   | Set End Plate Offset | -500 V   | Set Dry Gas      | 4.0 l/min |
| Scan End    | 3000 m/z | Set Charging Voltage | 2000 V   | Set Divert Valve | Source    |
|             |          | Set Corona           | 0 nA     | Set APCI Heater  | 0 °C      |

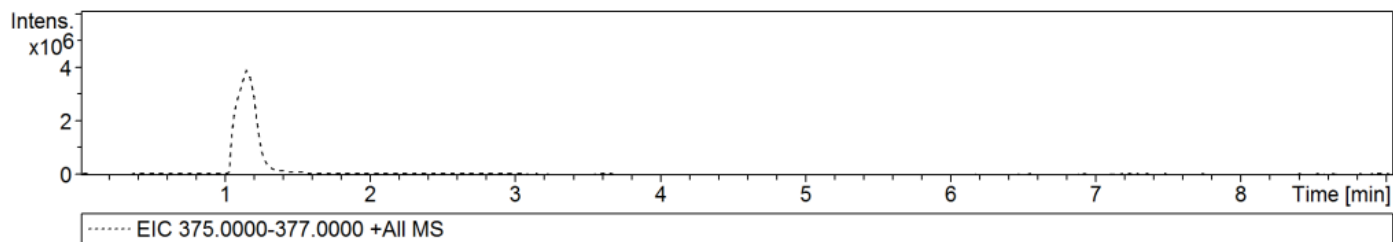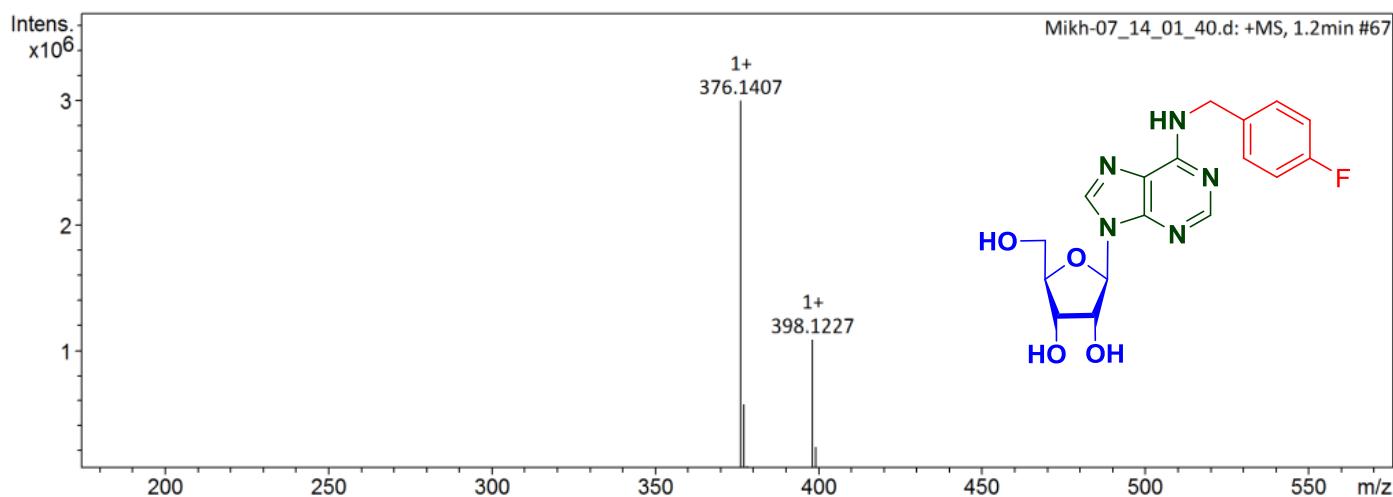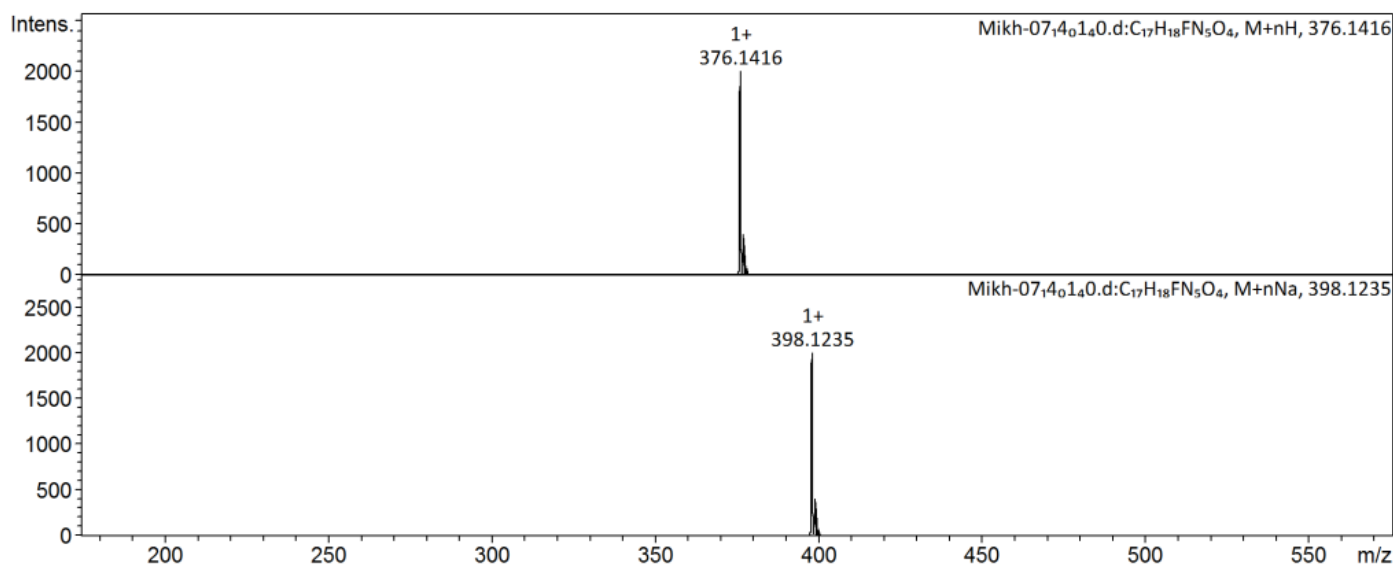

High-resolution mass spectrum (HRMS) of *N*<sup>6</sup>-(4-fluorobenzyl)-adenosine (**7**)

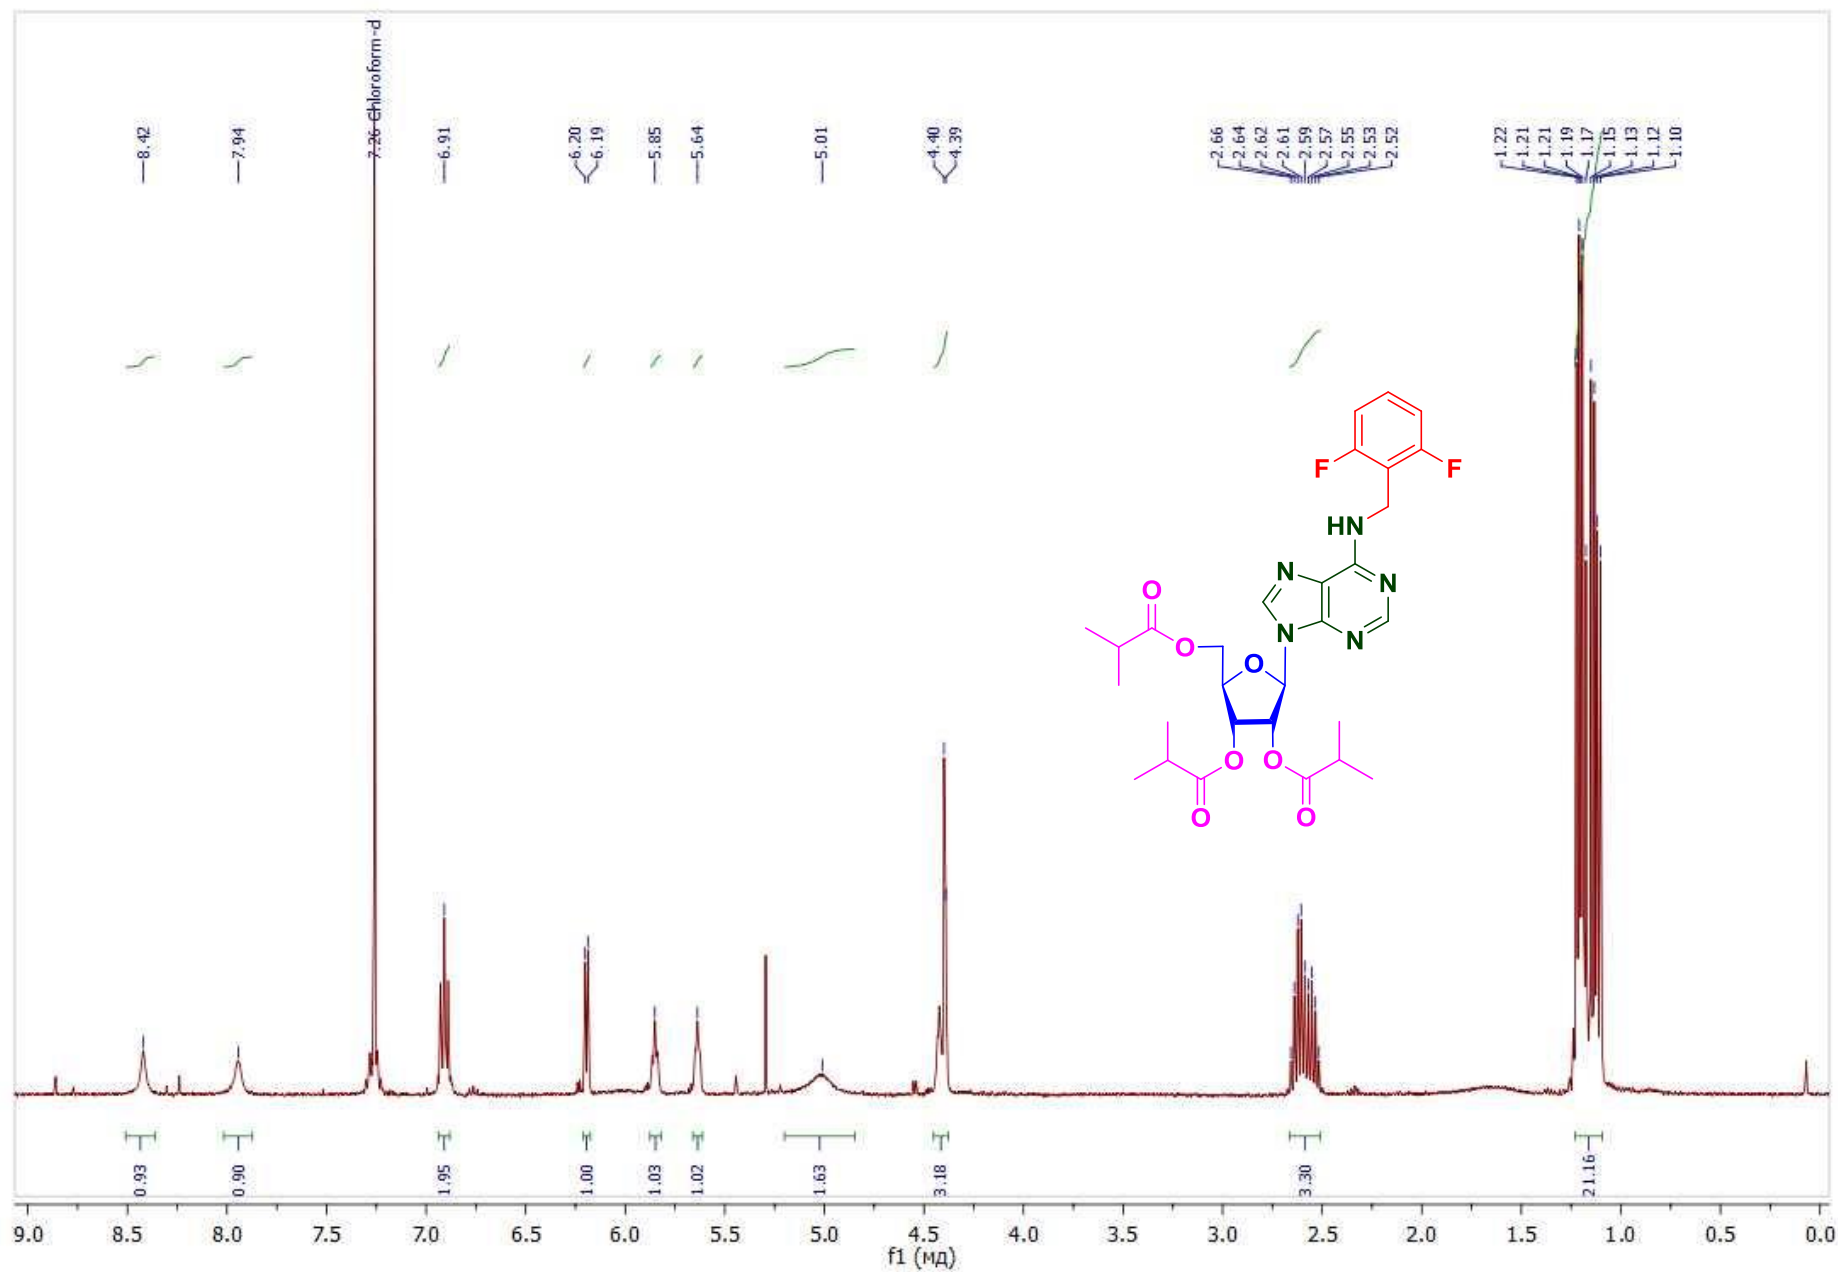

<sup>1</sup>H-NMR-spectrum (400 MHz) of *N*<sup>6</sup>-(2,6-difluorobenzyl)-2',3',5'-tri-*O*-isobutyryladenine in CDCl<sub>3</sub> at 303 K

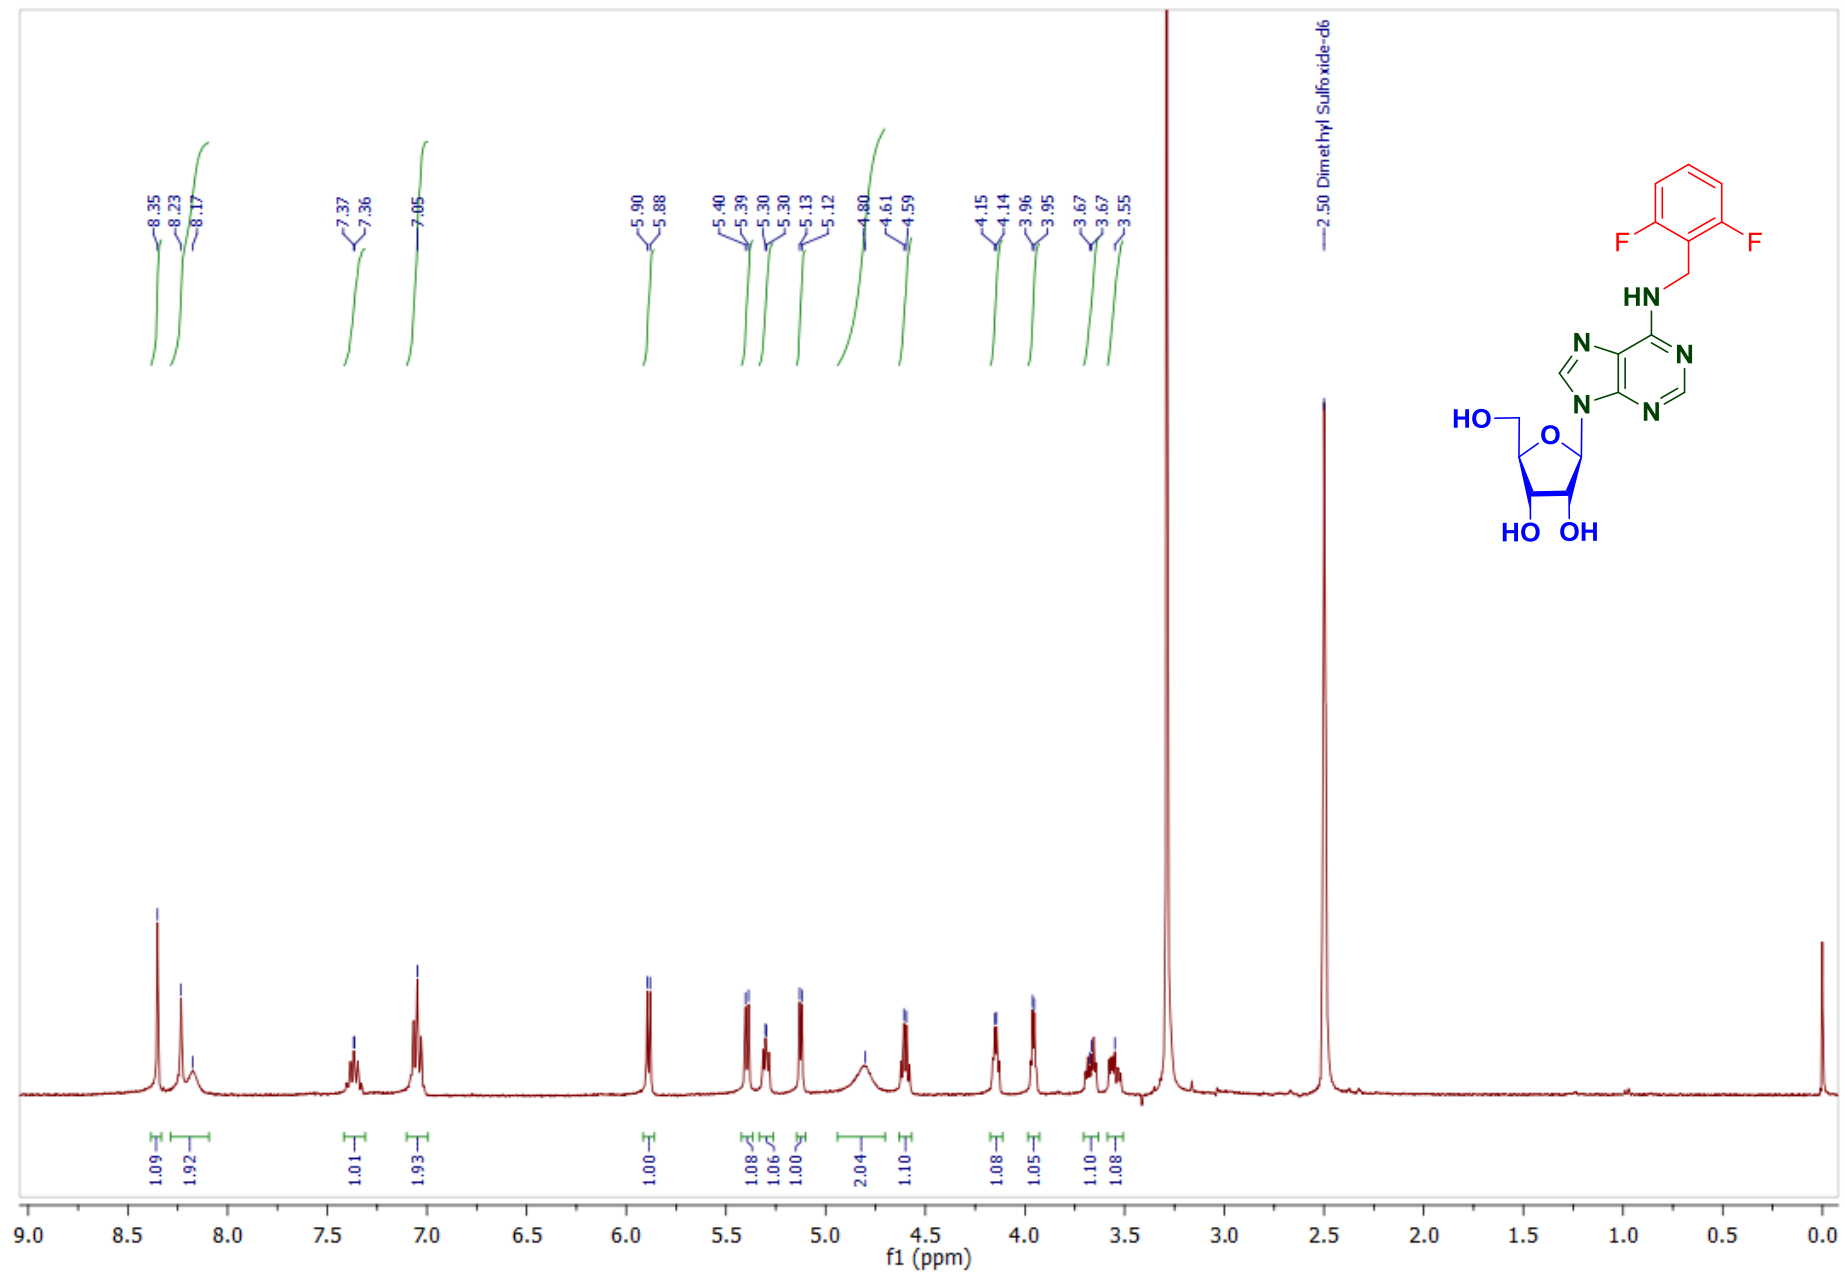

$^1\text{H-NMR}$ -spectrum (400 MHz) of  $N^6$ -(2,6-difluorobenzyl)-adenosine (**8**) in  $\text{DMSO-}d_6$  at 303 K

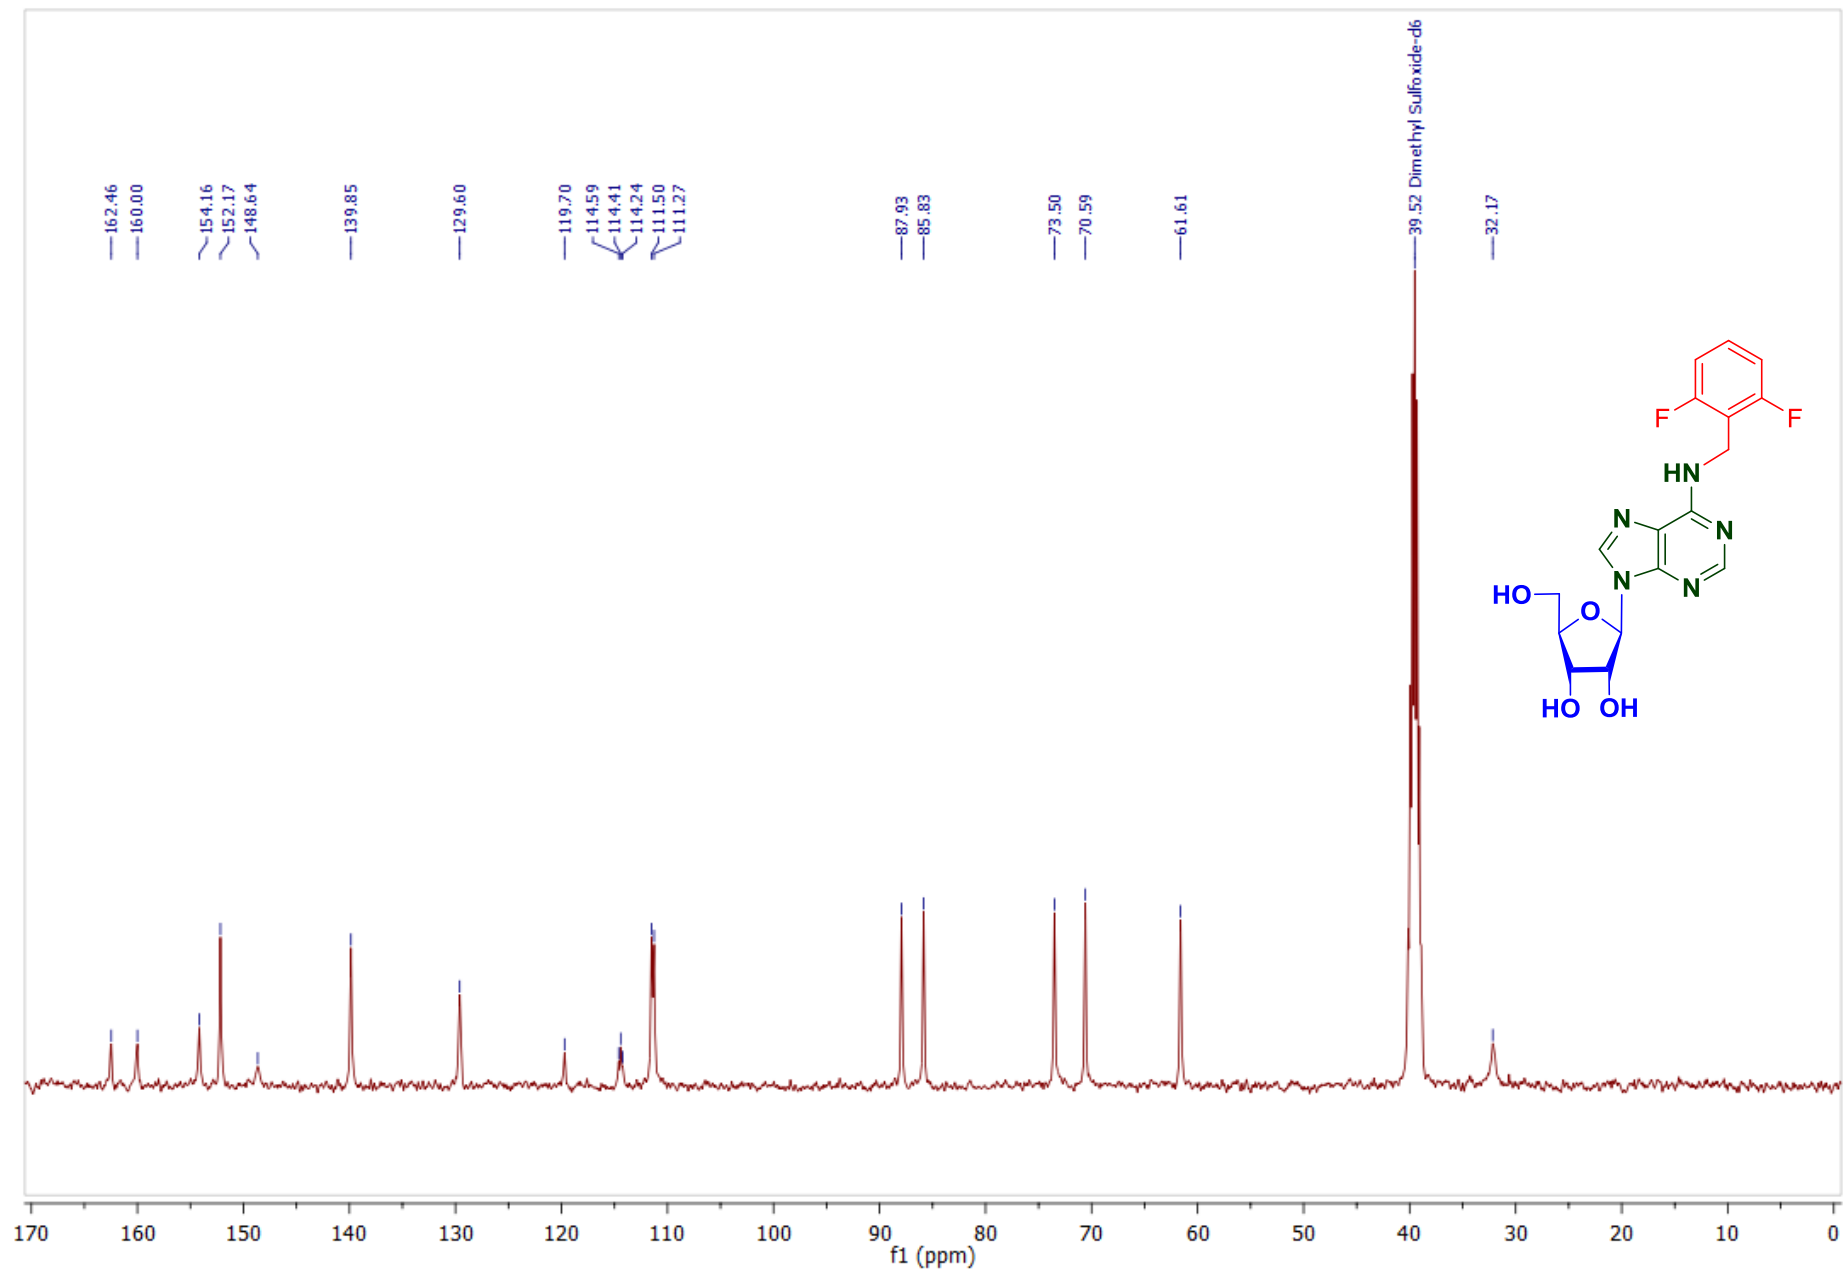

$^{13}\text{C}$ -NMR-spectrum (100 MHz) of  $N^6$ -(2,6-difluorobenzyl)-adenosine (**8**) in  $\text{DMSO-}d_6$  at 303 K

### Acquisition Parameter

|             |          |                      |          |                  |           |
|-------------|----------|----------------------|----------|------------------|-----------|
| Source Type | ESI      | Ion Polarity         | Positive | Set Nebulizer    | 0.4 Bar   |
| Focus       | Active   | Set Capillary        | 4500 V   | Set Dry Heater   | 200 °C    |
| Scan Begin  | 50 m/z   | Set End Plate Offset | -500 V   | Set Dry Gas      | 4.0 l/min |
| Scan End    | 3000 m/z | Set Charging Voltage | 2000 V   | Set Divert Valve | Source    |
|             |          | Set Corona           | 0 nA     | Set APCI Heater  | 0 °C      |

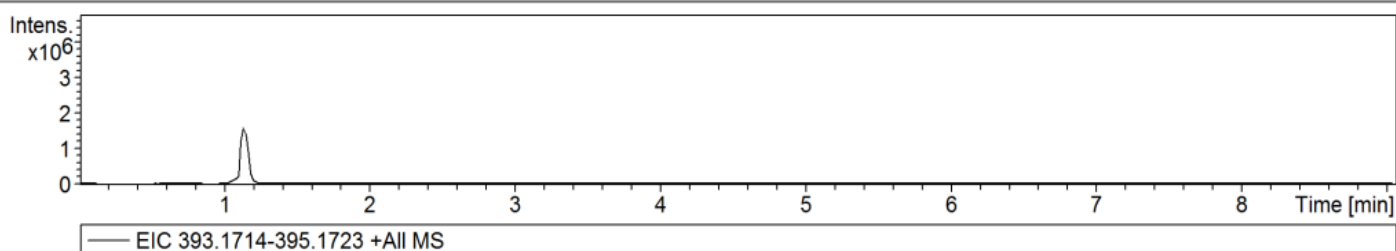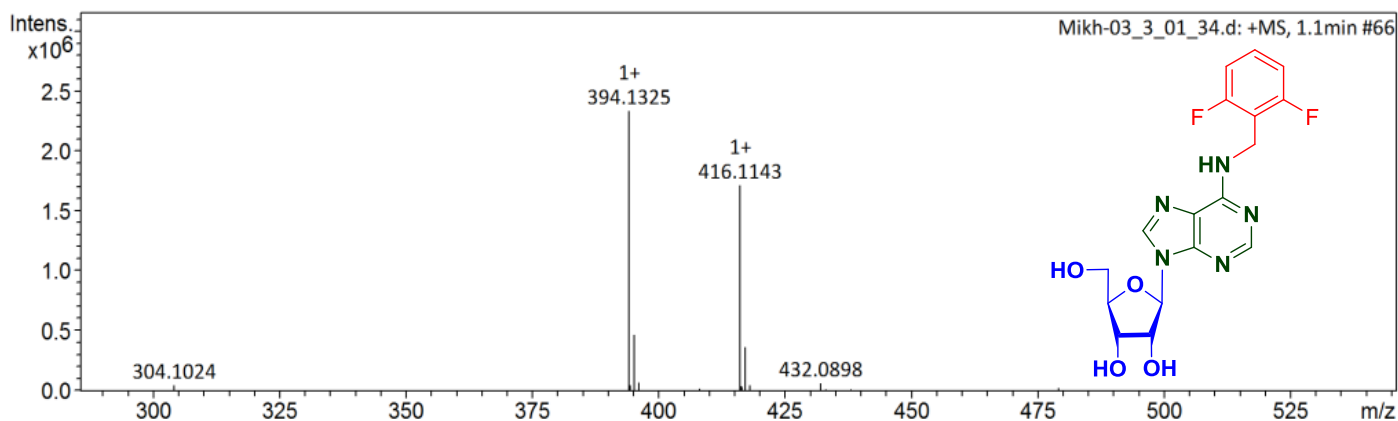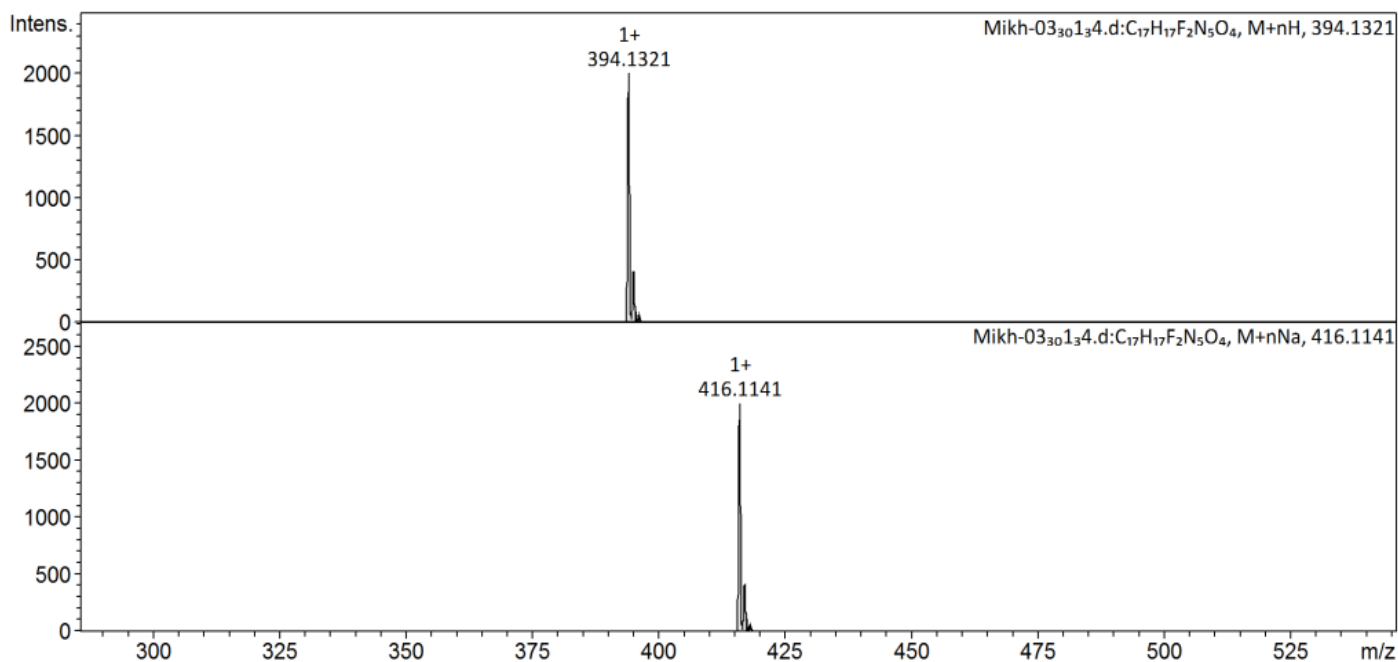

High-resolution mass spectrum (HRMS) of *N*<sup>6</sup>-(2,6-difluorobenzyl)-adenosine (**8**)

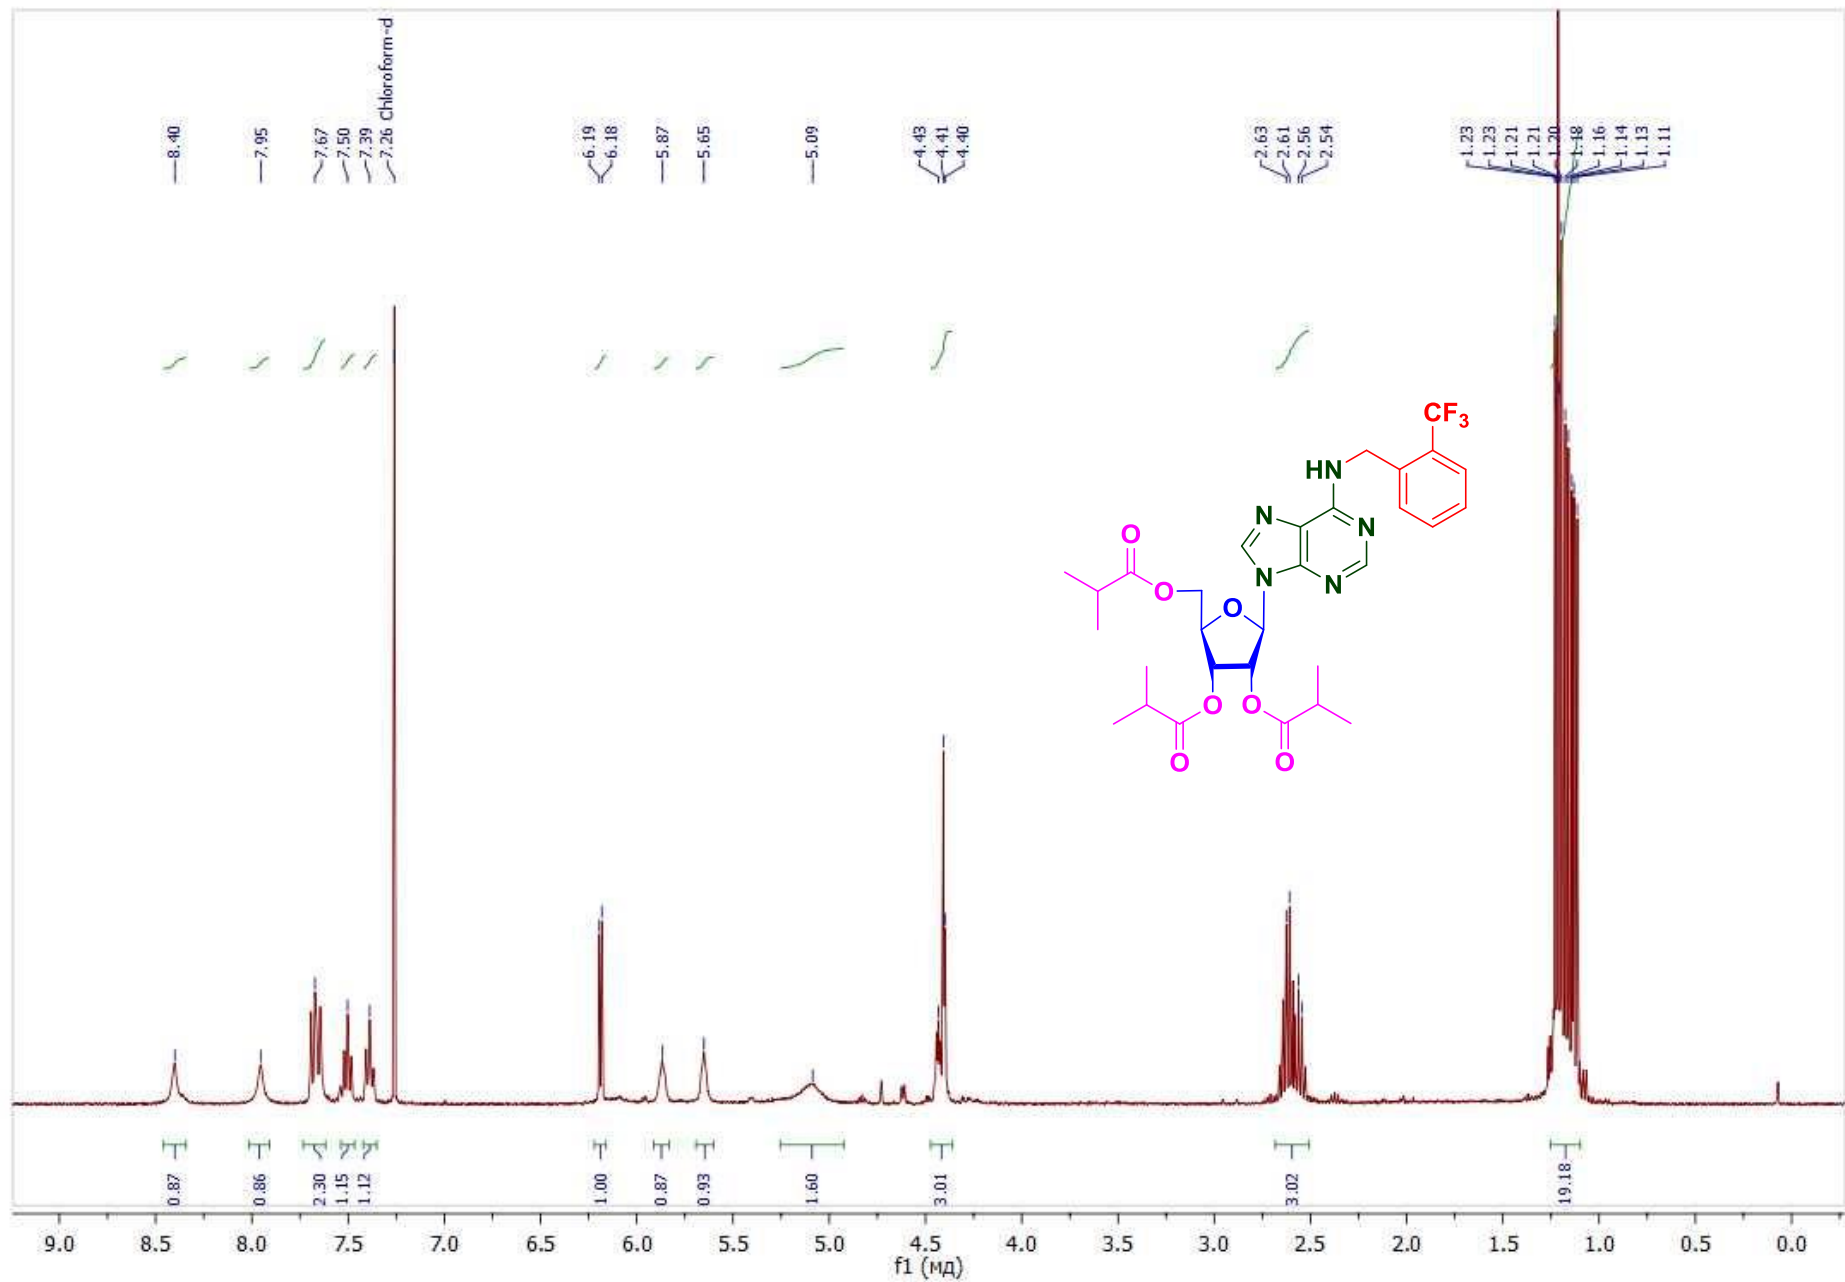

<sup>1</sup>H-NMR-spectrum (400 MHz) of *N*<sup>6</sup>-(2-trifluoromethylbenzyl)-2',3',5'-tri-*O*-isobutyryladenine in CDCl<sub>3</sub> at 303 K

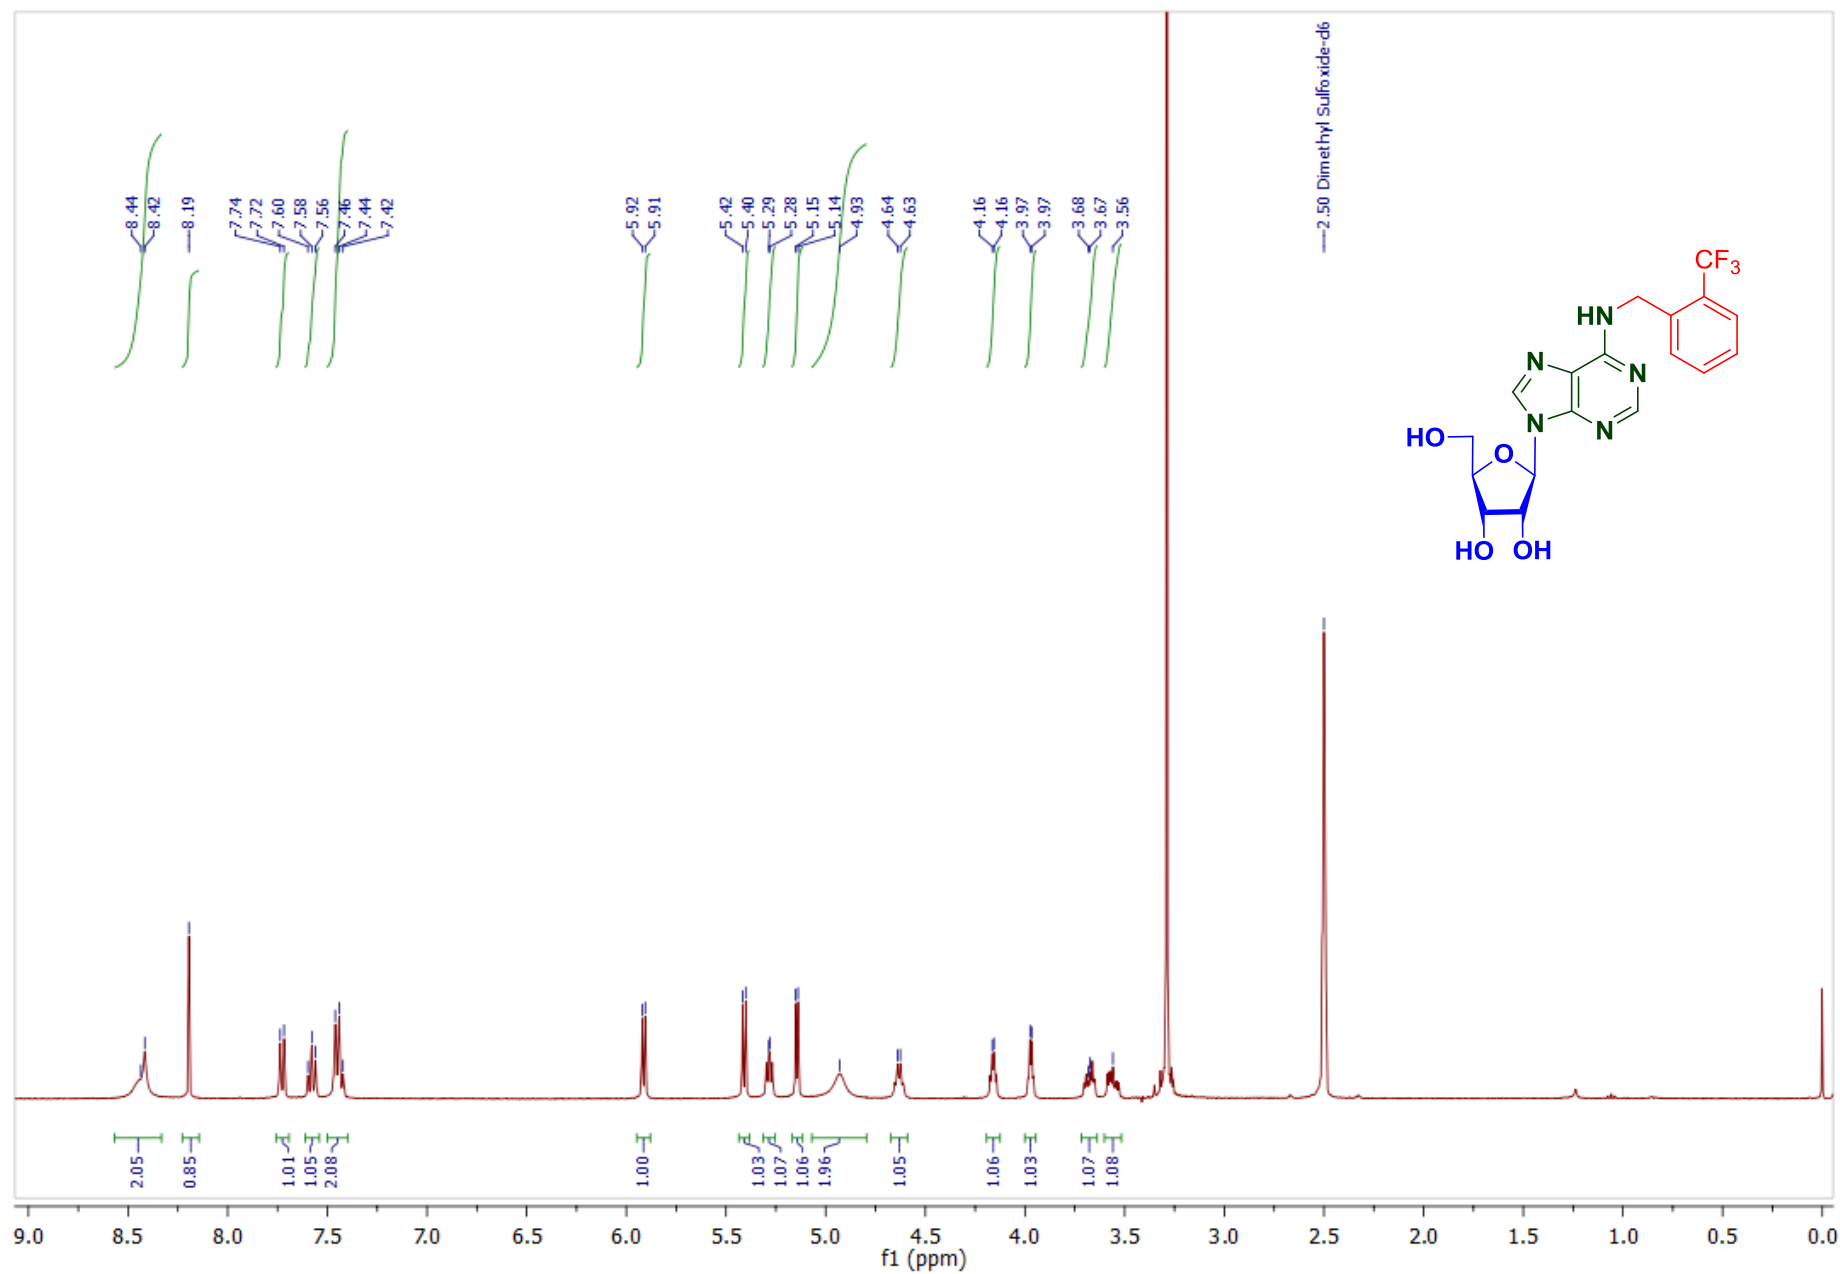

<sup>1</sup>H-NMR-spectrum (400 MHz) of *N*<sup>6</sup>-(2-trifluoromethylbenzyl)-adenosine (9) in DMSO-*d*<sub>6</sub> at 303 K



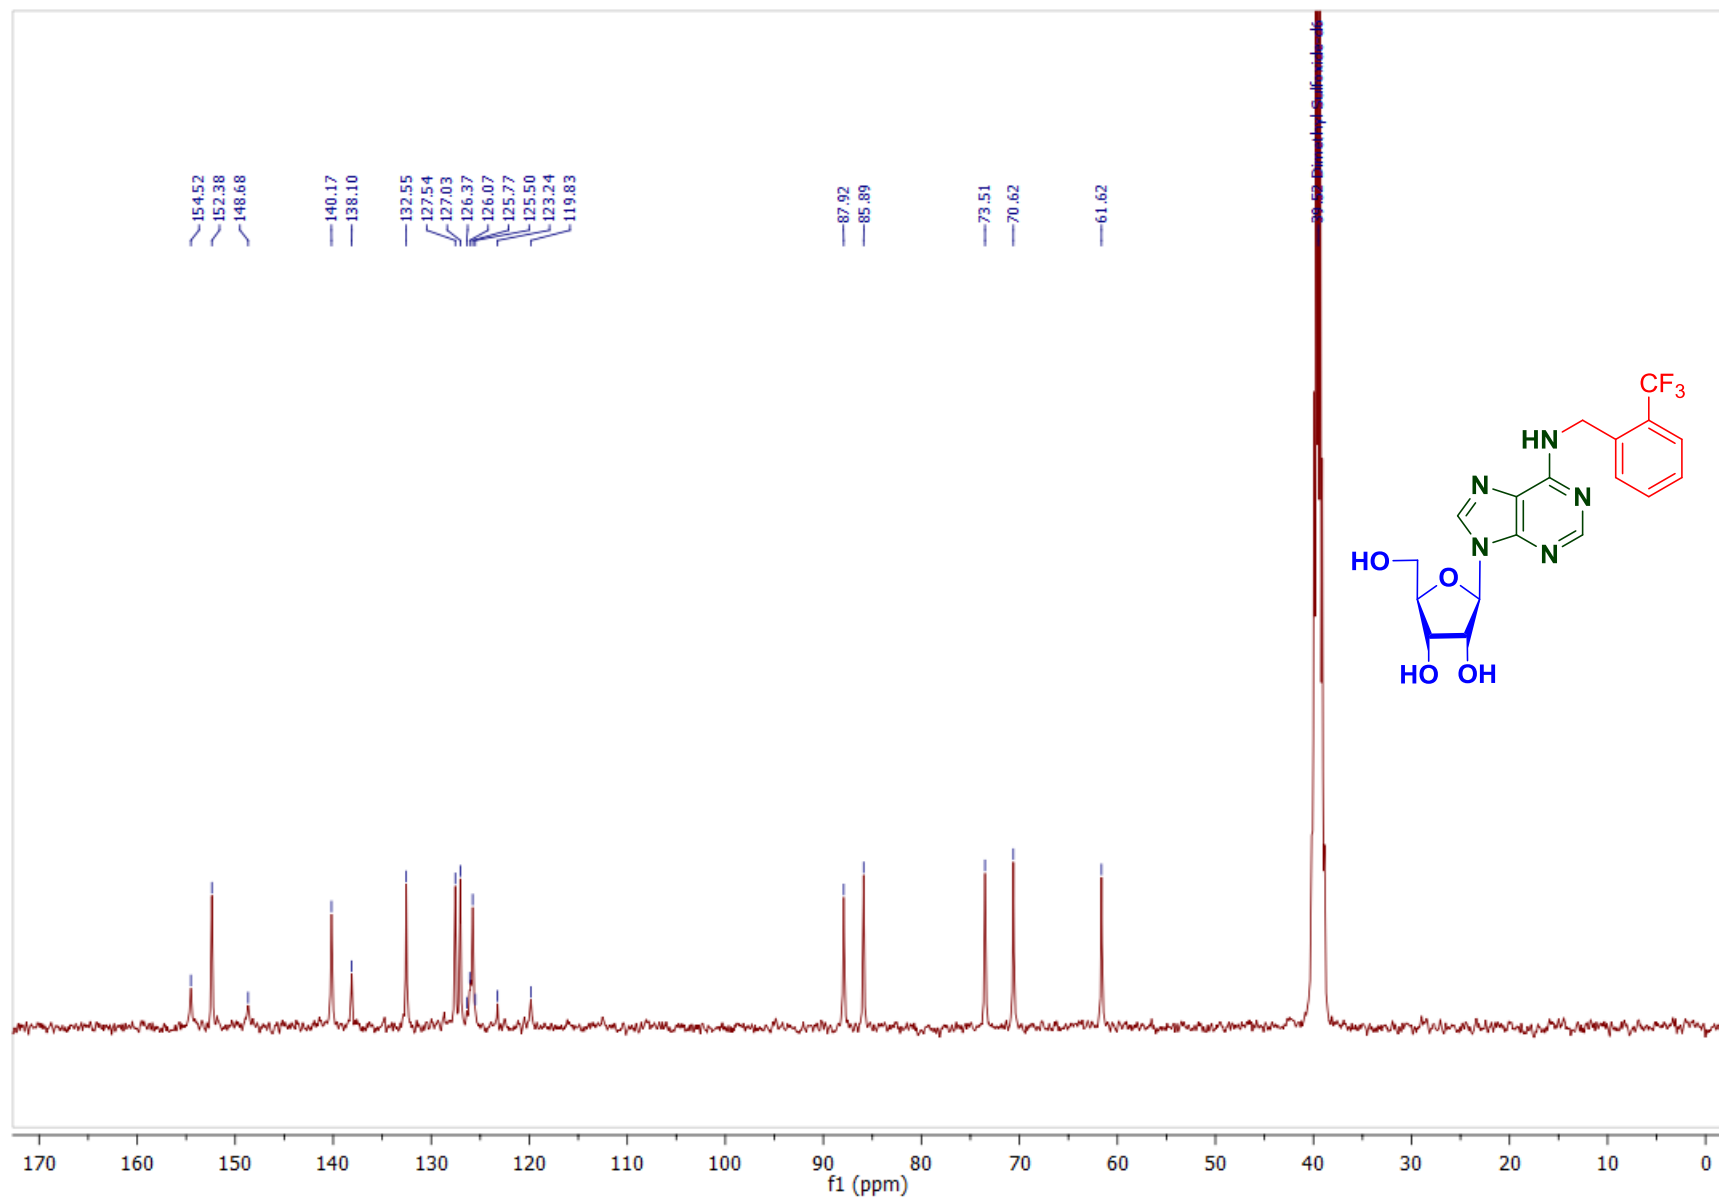

$^{13}\text{C}$ -NMR-spectrum (100 MHz) of  $N^6$ -(2-trifluoromethylbenzyl)-adenosine (9) in  $\text{DMSO-}d_6$  at 303 K

**Acquisition Parameter**

|             |          |                      |          |                  |           |
|-------------|----------|----------------------|----------|------------------|-----------|
| Source Type | ESI      | Ion Polarity         | Positive | Set Nebulizer    | 0.4 Bar   |
| Focus       | Active   | Set Capillary        | 4500 V   | Set Dry Heater   | 200 °C    |
| Scan Begin  | 50 m/z   | Set End Plate Offset | -500 V   | Set Dry Gas      | 4.0 l/min |
| Scan End    | 3000 m/z | Set Charging Voltage | 2000 V   | Set Divert Valve | Source    |
|             |          | Set Corona           | 0 nA     | Set APCI Heater  | 0 °C      |

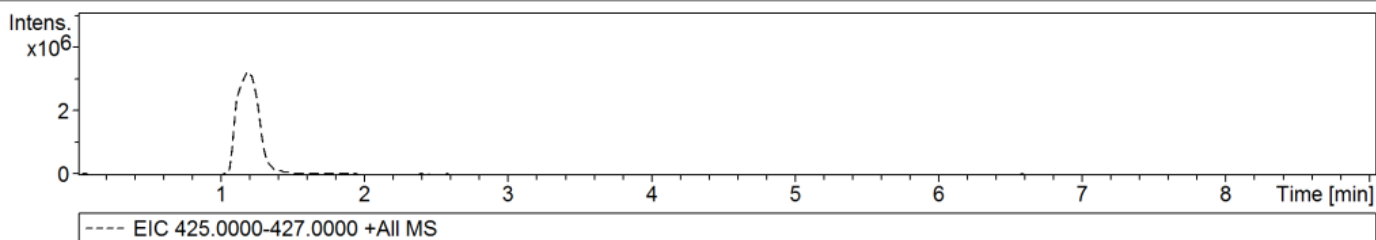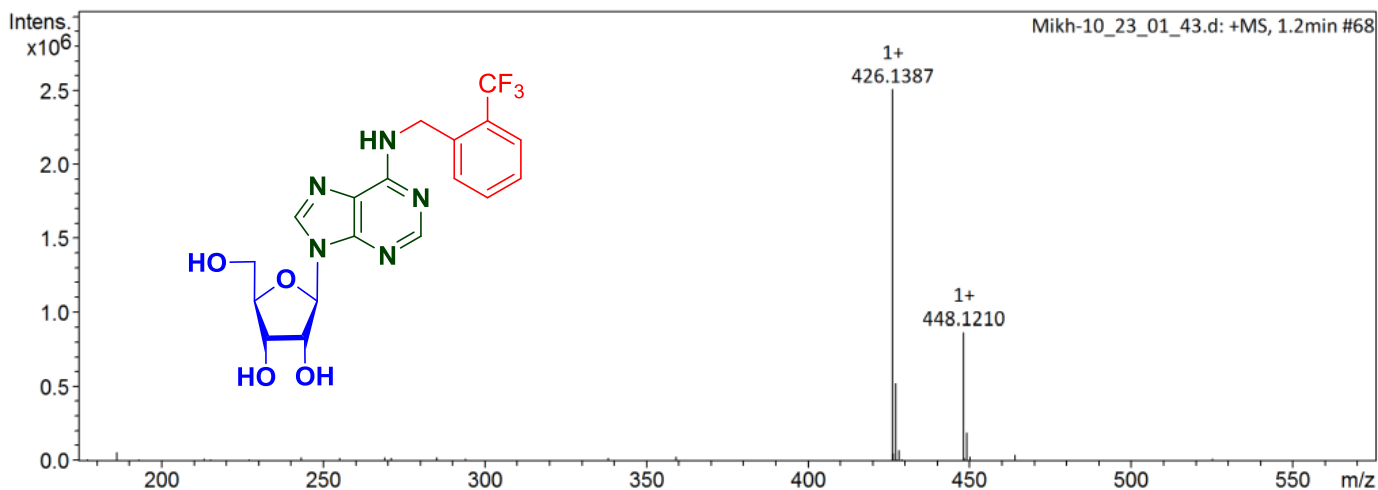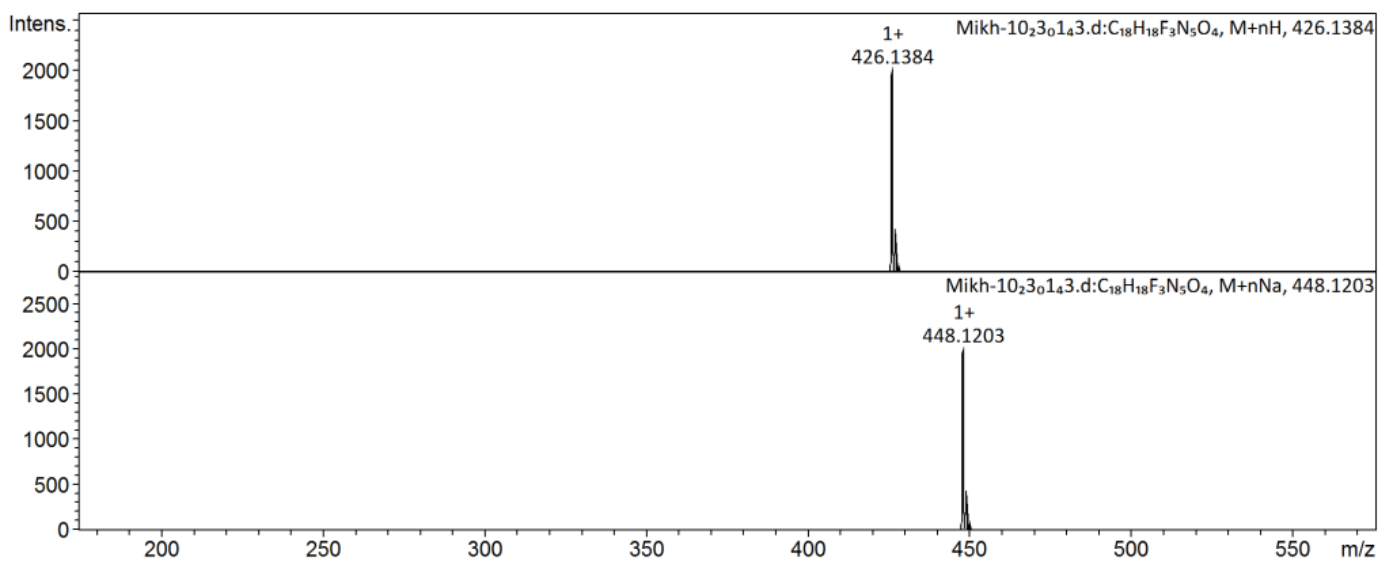

High-resolution mass spectrum (HRMS) of *N*<sup>6</sup>-(2-trifluoromethylbenzyl)-adenosine (**9**)

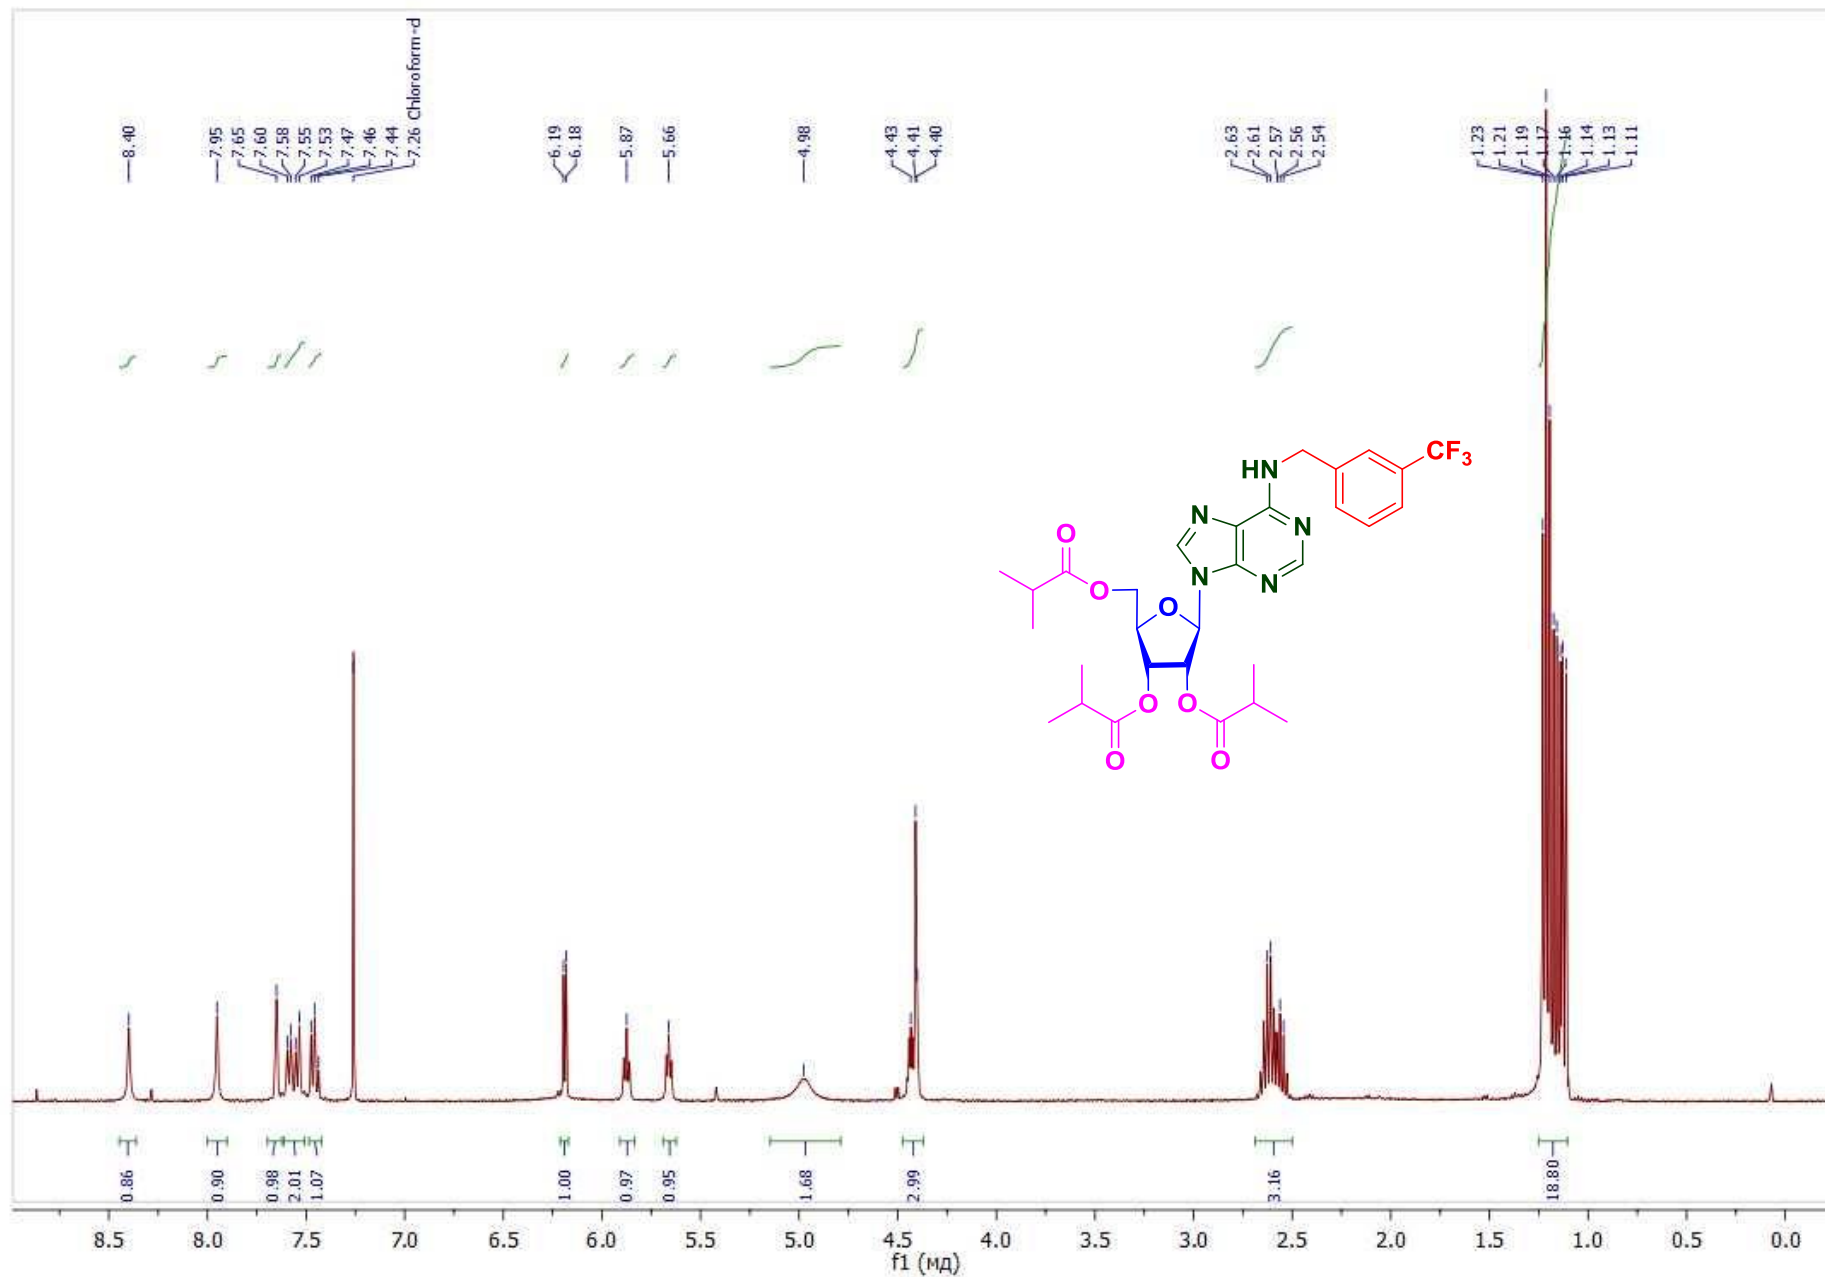

<sup>1</sup>H-NMR-spectrum (400 MHz) of *N*<sup>6</sup>-(3-trifluoromethylbenzyl)-2',3',5'-tri-*O*-isobutyryladenine in CDCl<sub>3</sub> at 303 K

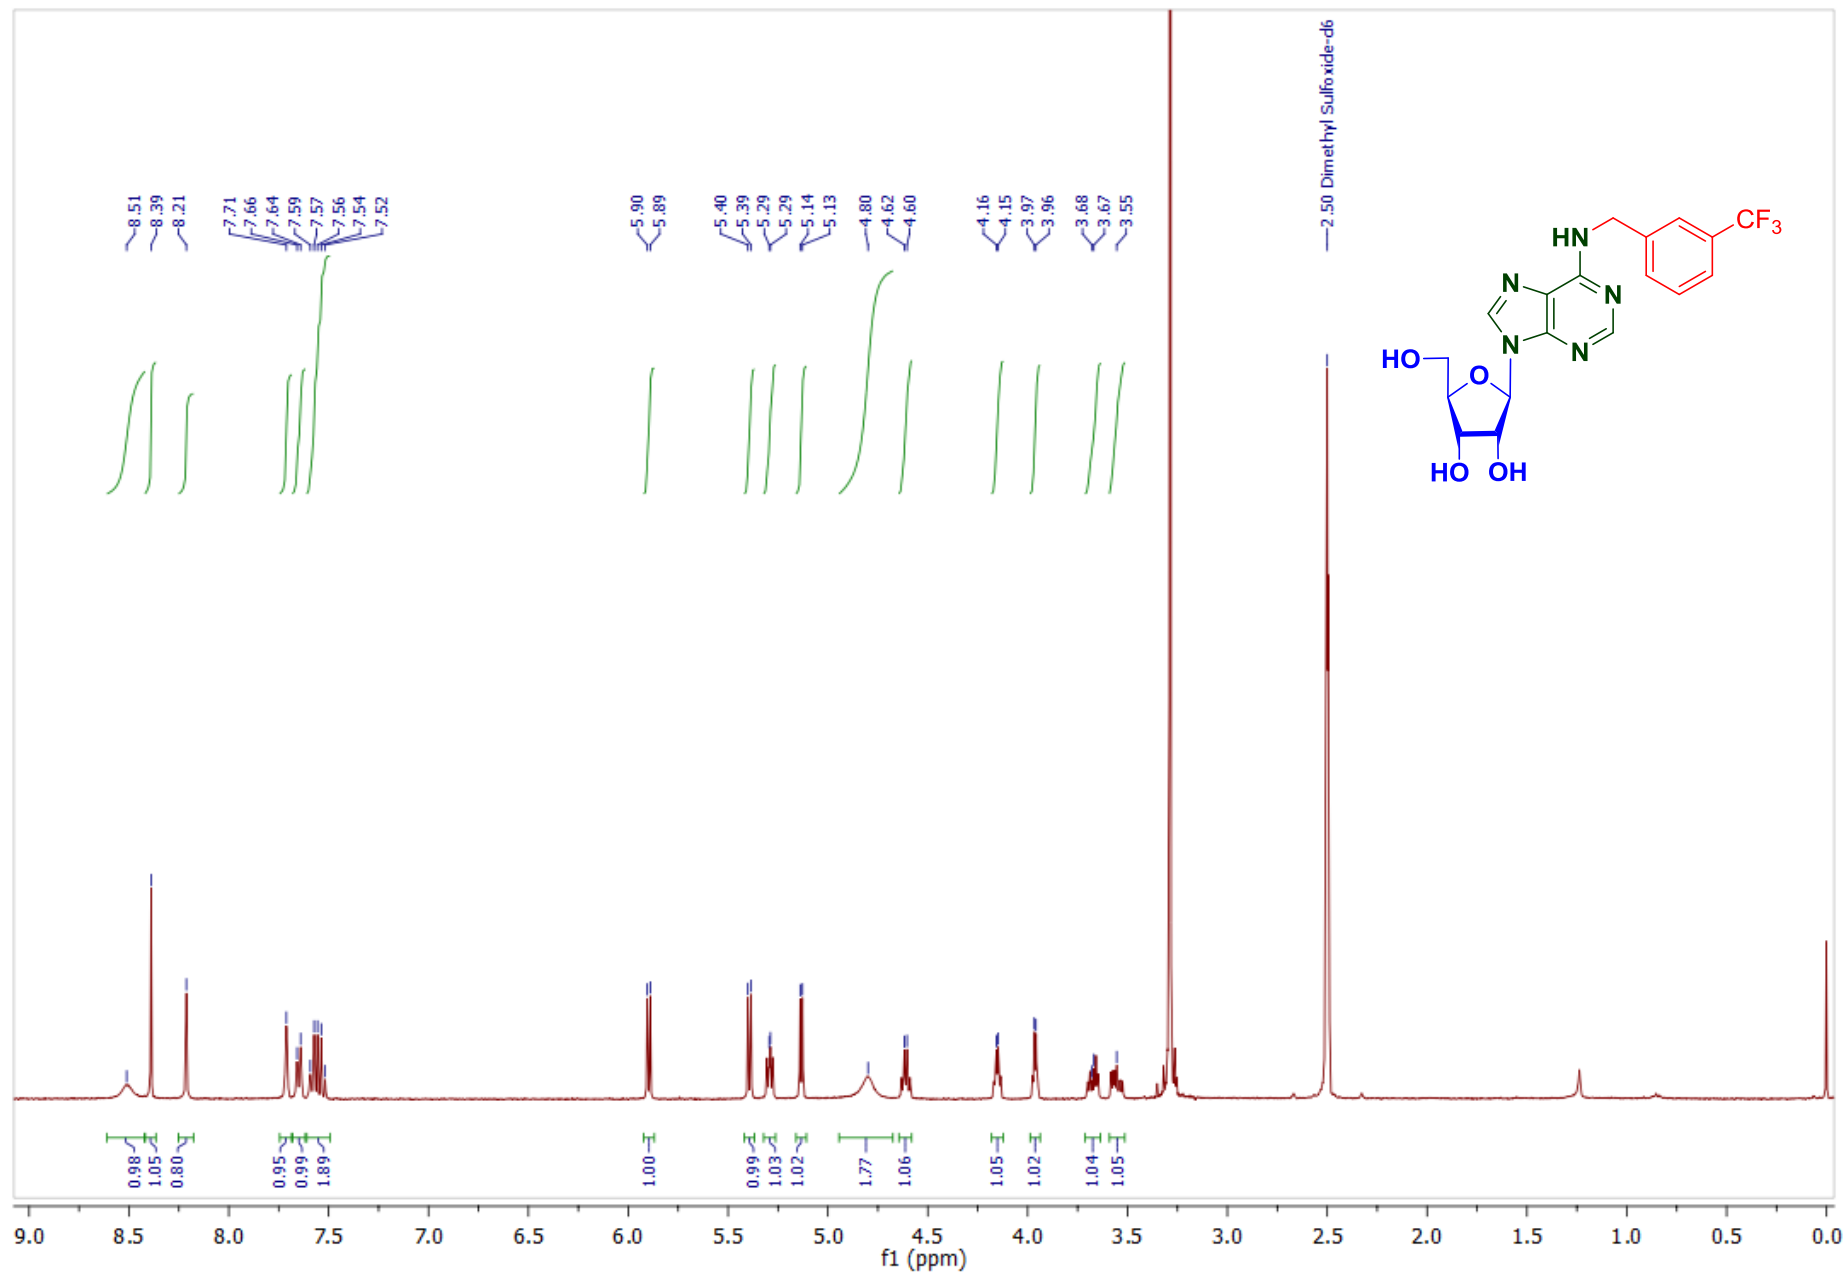

<sup>1</sup>H-NMR-spectrum (400 MHz) of *N*<sup>6</sup>-(3-trifluoromethylbenzyl)adenosine (**10**) in DMSO-*d*<sub>6</sub> at 303 K

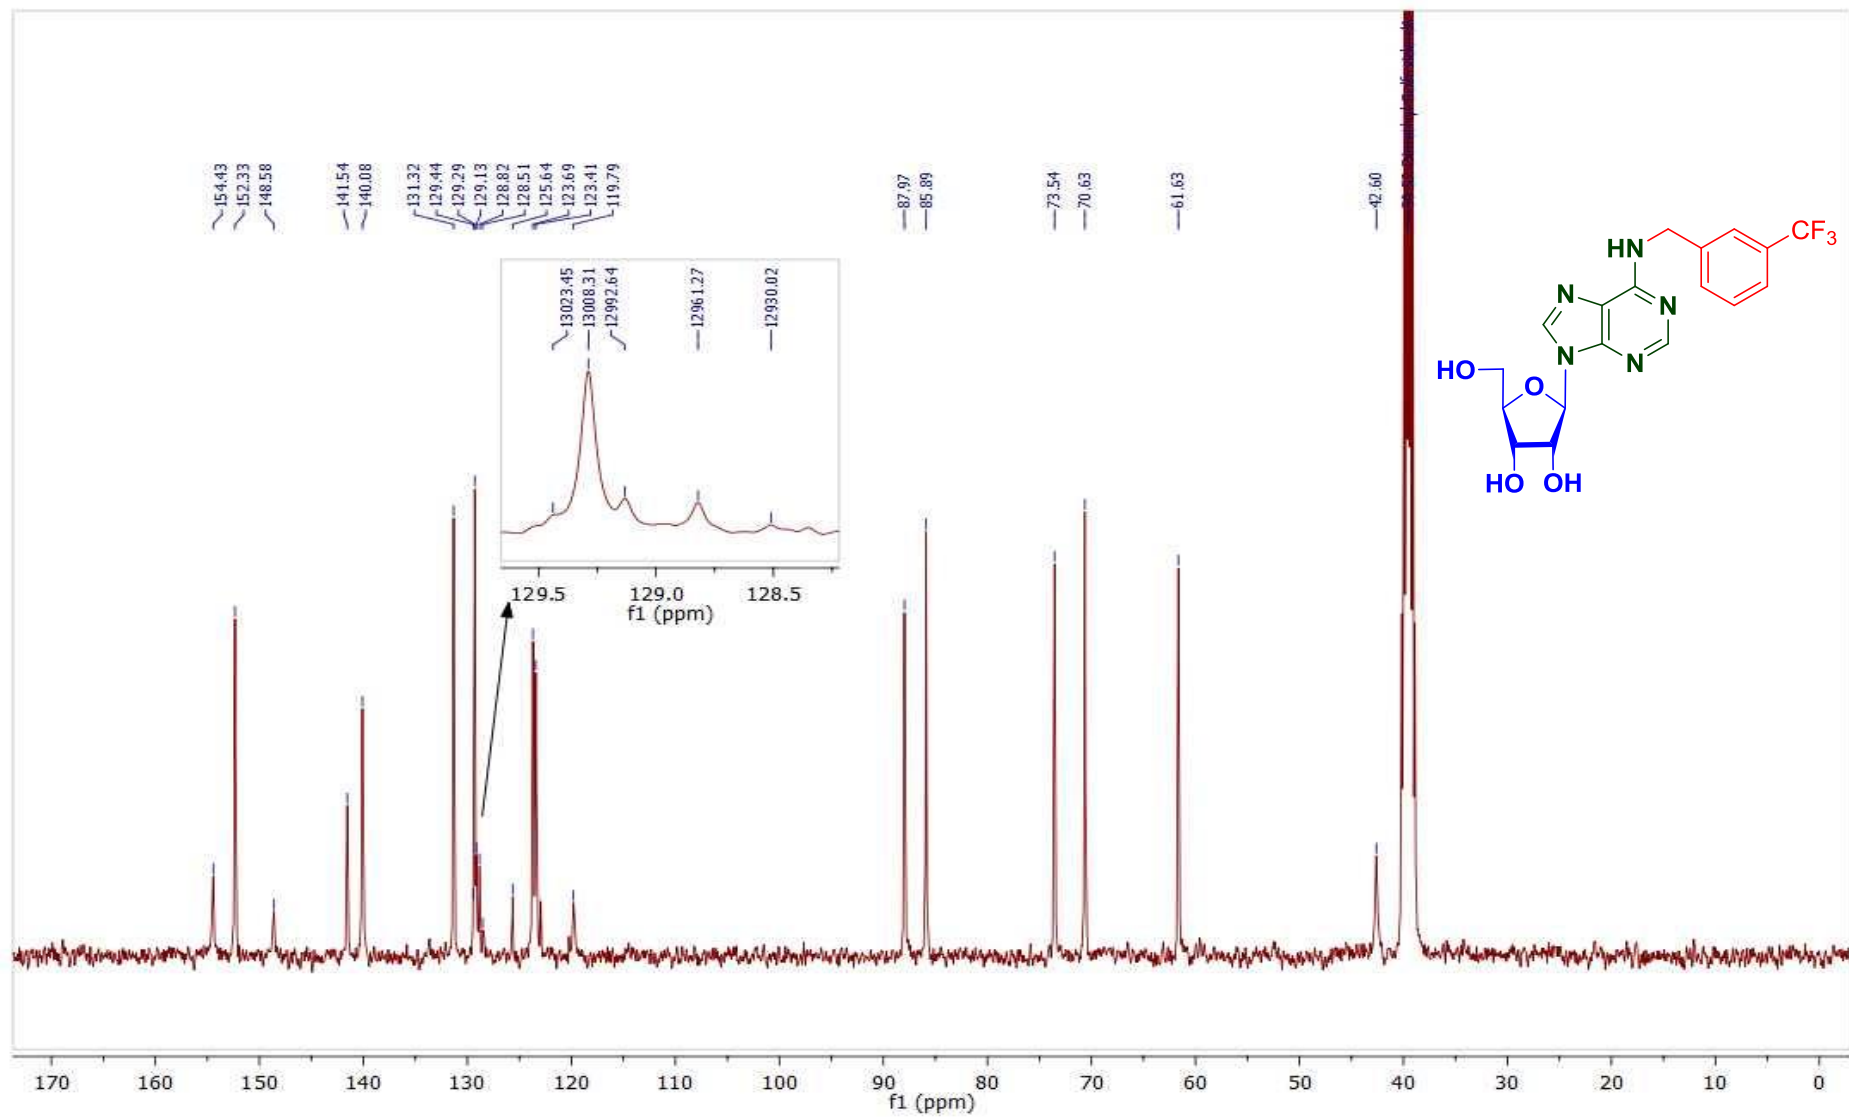

$^{13}\text{C}$ -NMR-spectrum (100 MHz) of  $N^6$ -(3-trifluoromethylbenzyl)-adenosine (**10**) in  $\text{DMSO-}d_6$  at 303 K

### Acquisition Parameter

|             |          |                      |          |                  |           |
|-------------|----------|----------------------|----------|------------------|-----------|
| Source Type | ESI      | Ion Polarity         | Positive | Set Nebulizer    | 0.4 Bar   |
| Focus       | Active   | Set Capillary        | 4500 V   | Set Dry Heater   | 200 °C    |
| Scan Begin  | 50 m/z   | Set End Plate Offset | -500 V   | Set Dry Gas      | 4.0 l/min |
| Scan End    | 3000 m/z | Set Charging Voltage | 2000 V   | Set Divert Valve | Source    |
|             |          | Set Corona           | 0 nA     | Set APCI Heater  | 0 °C      |

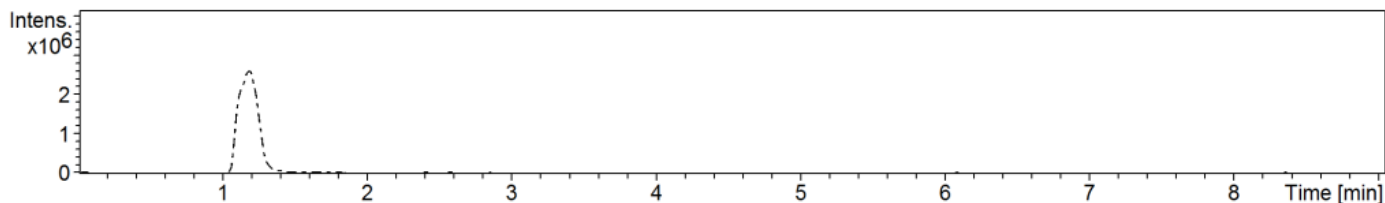

----- EIC 425.0000-427.0000 +All MS

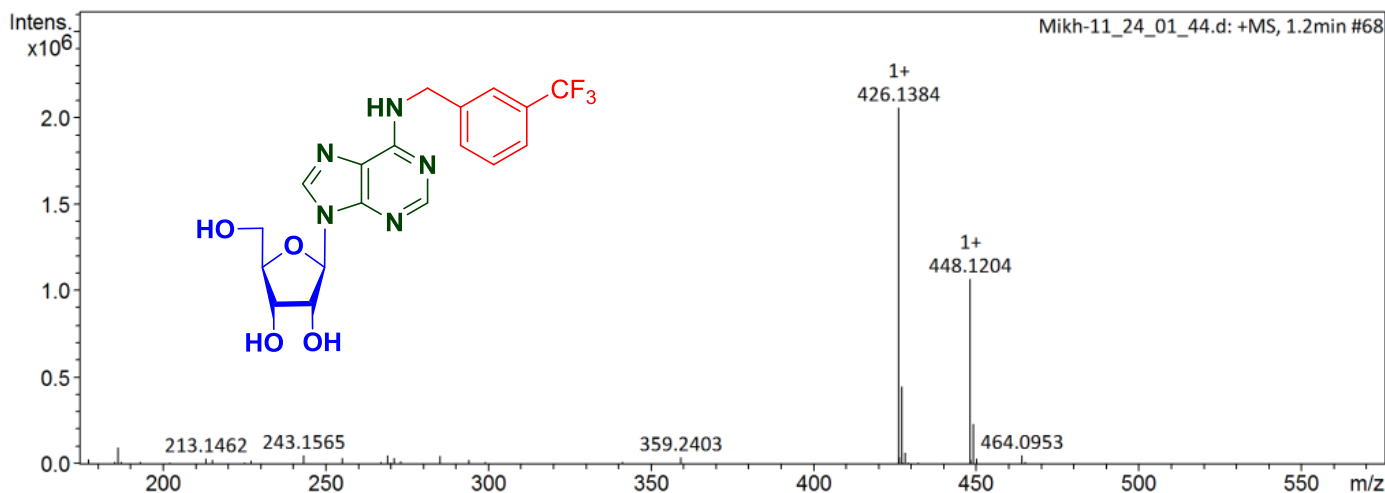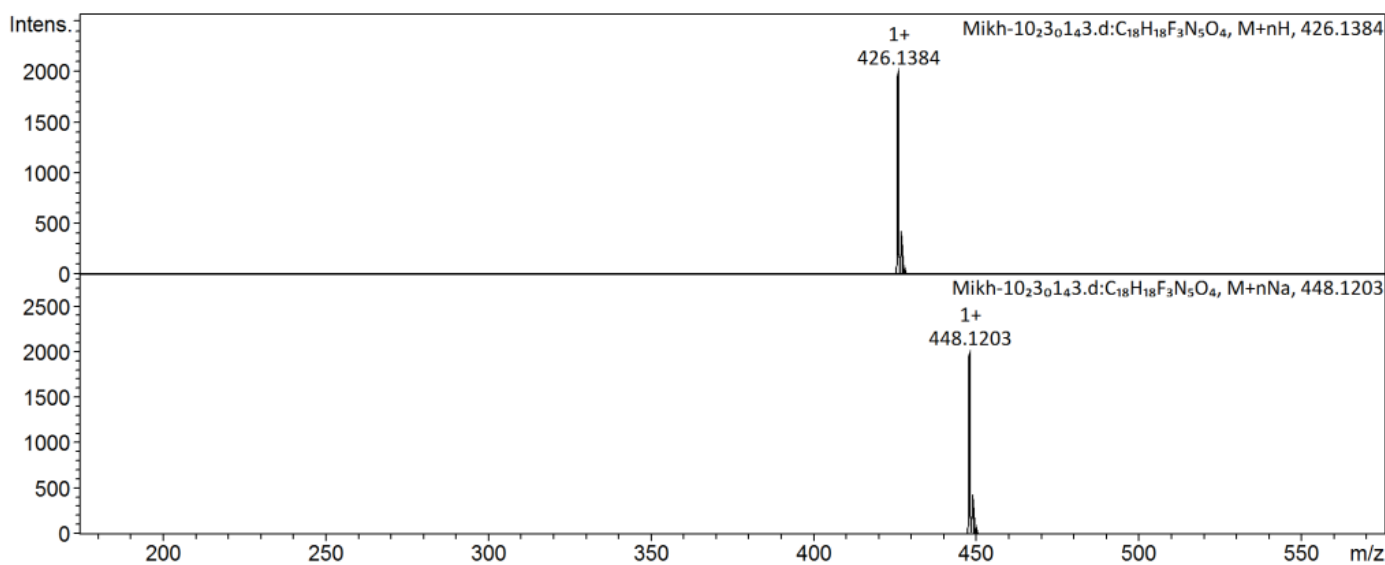

High-resolution mass spectrum (HRMS) of *N*<sup>6</sup>-(3-trifluoromethylbenzyl)-adenosine (**10**)

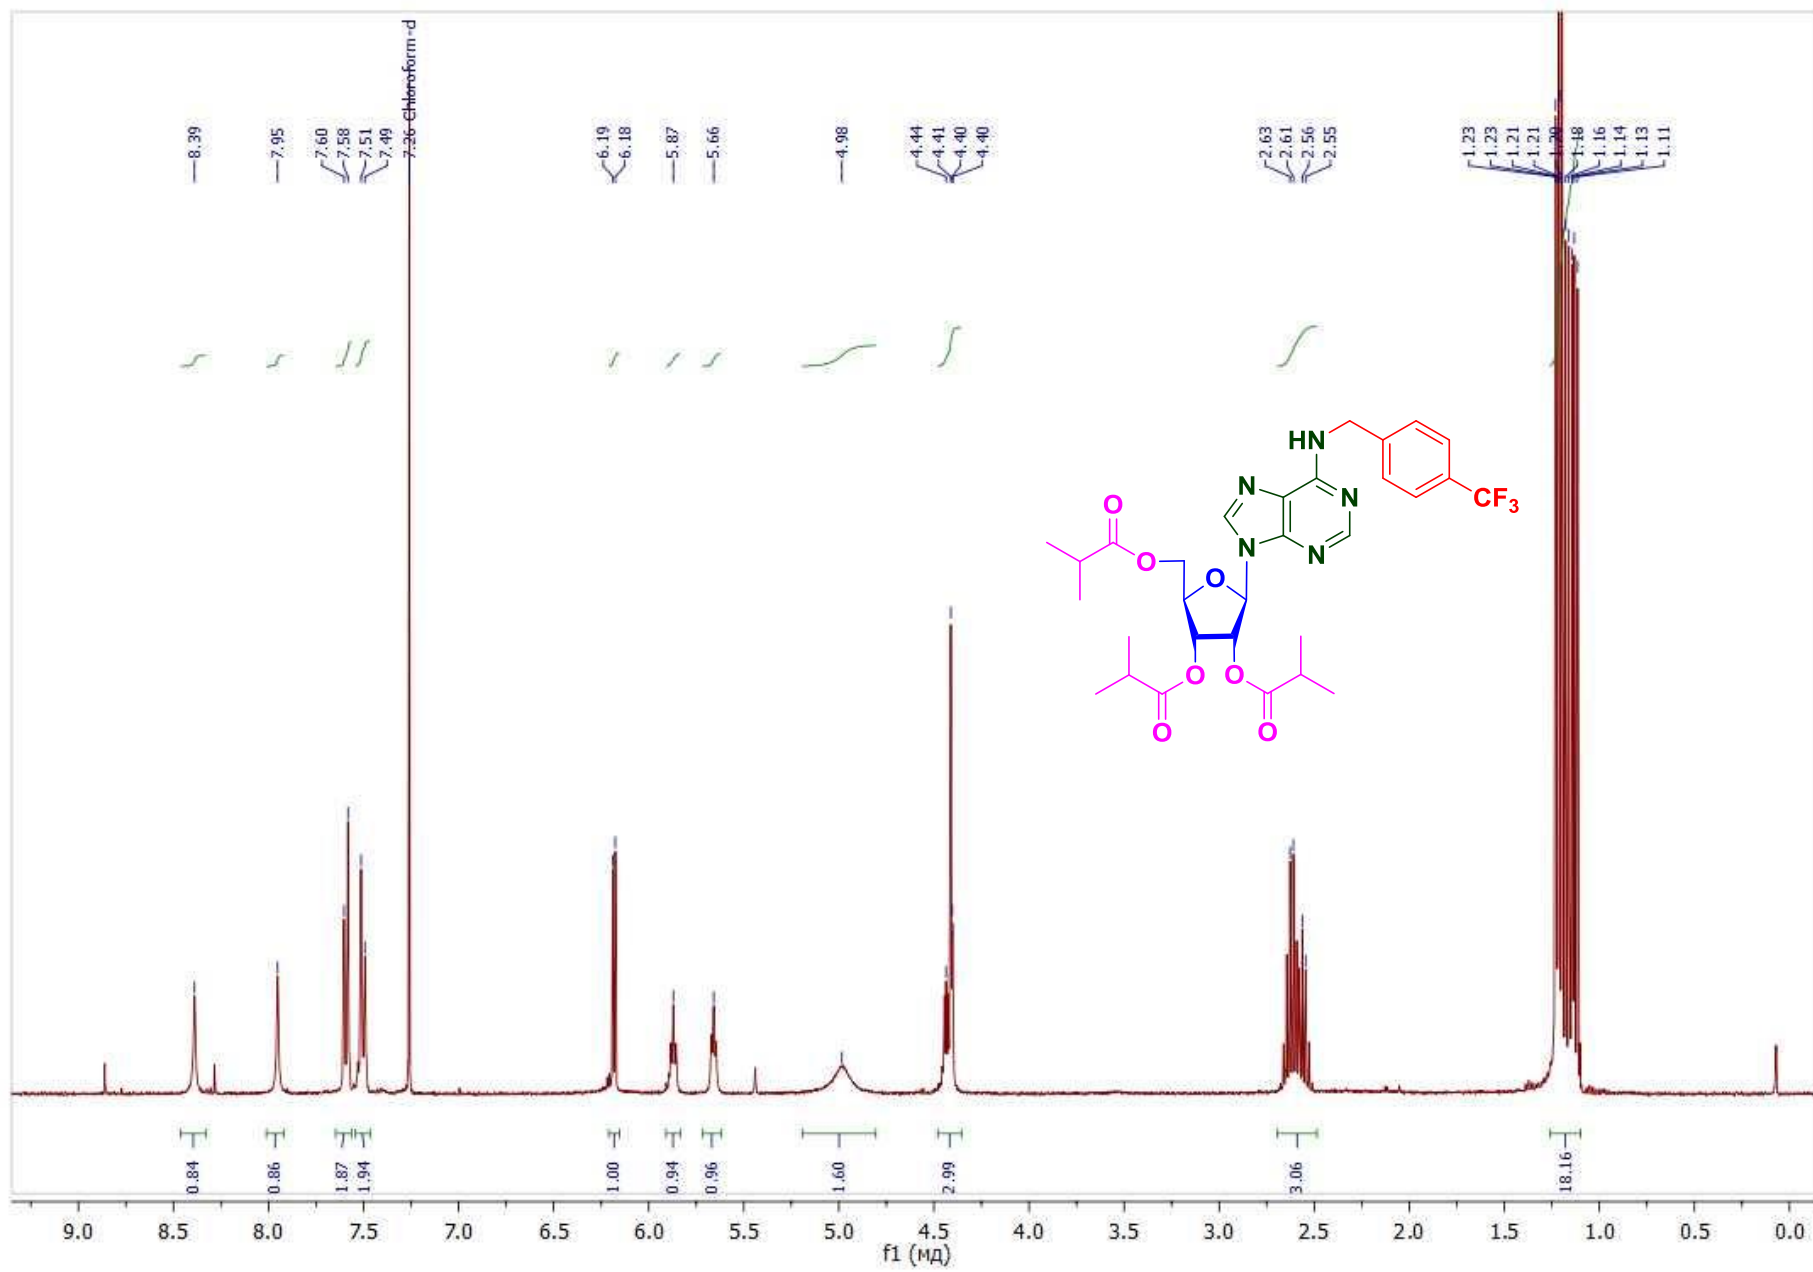

<sup>1</sup>H-NMR-spectrum (400 MHz) of *N*<sup>6</sup>-(4-trifluoromethylbenzyl)-2',3',5'-tri-*O*-isobutyroyladenosine in CDCl<sub>3</sub> at 303 K

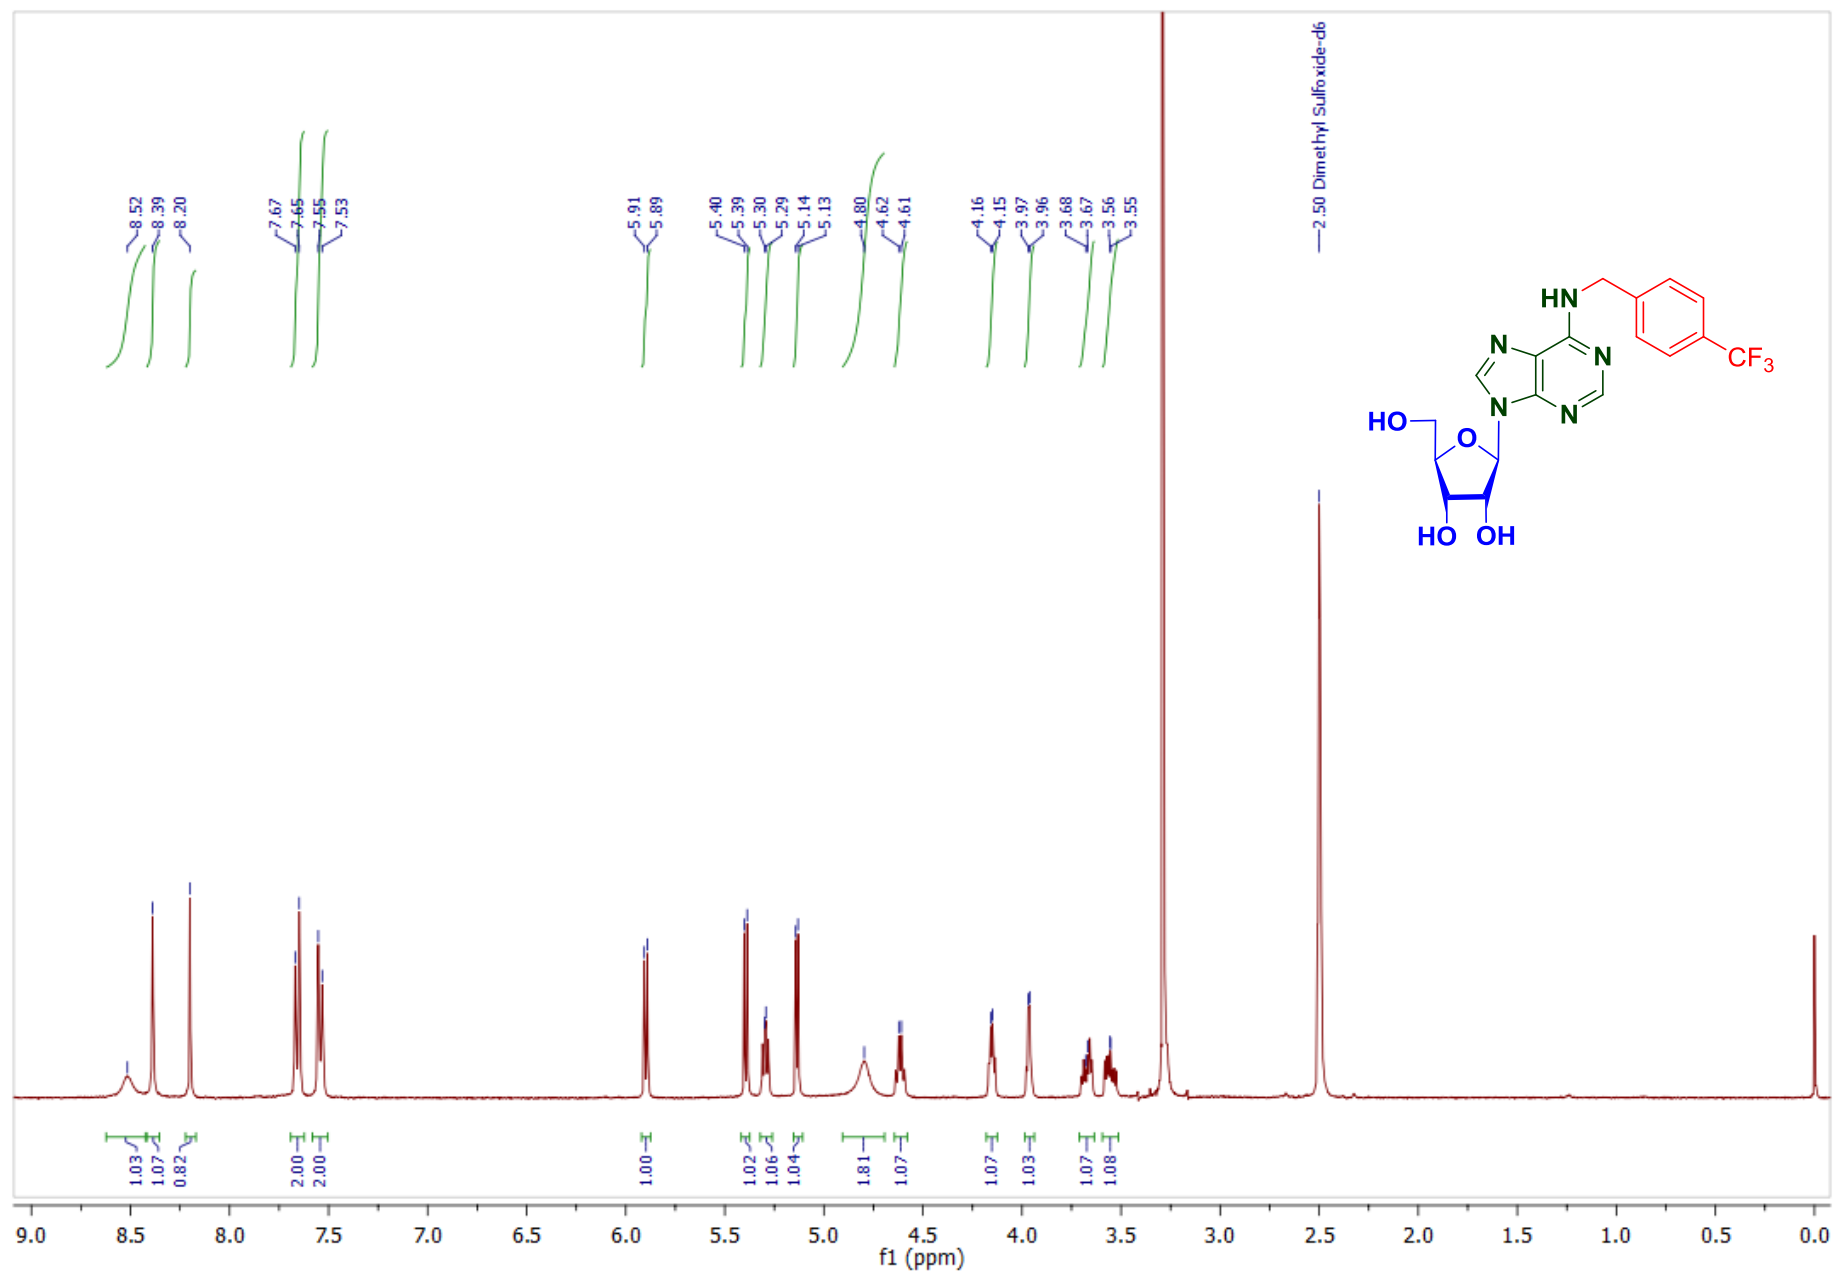

<sup>1</sup>H-NMR-spectrum (400 MHz) of *N*<sup>6</sup>-(4-trifluoromethylbenzyl)adenosine (**11**) in DMSO-*d*<sub>6</sub> at 303 K



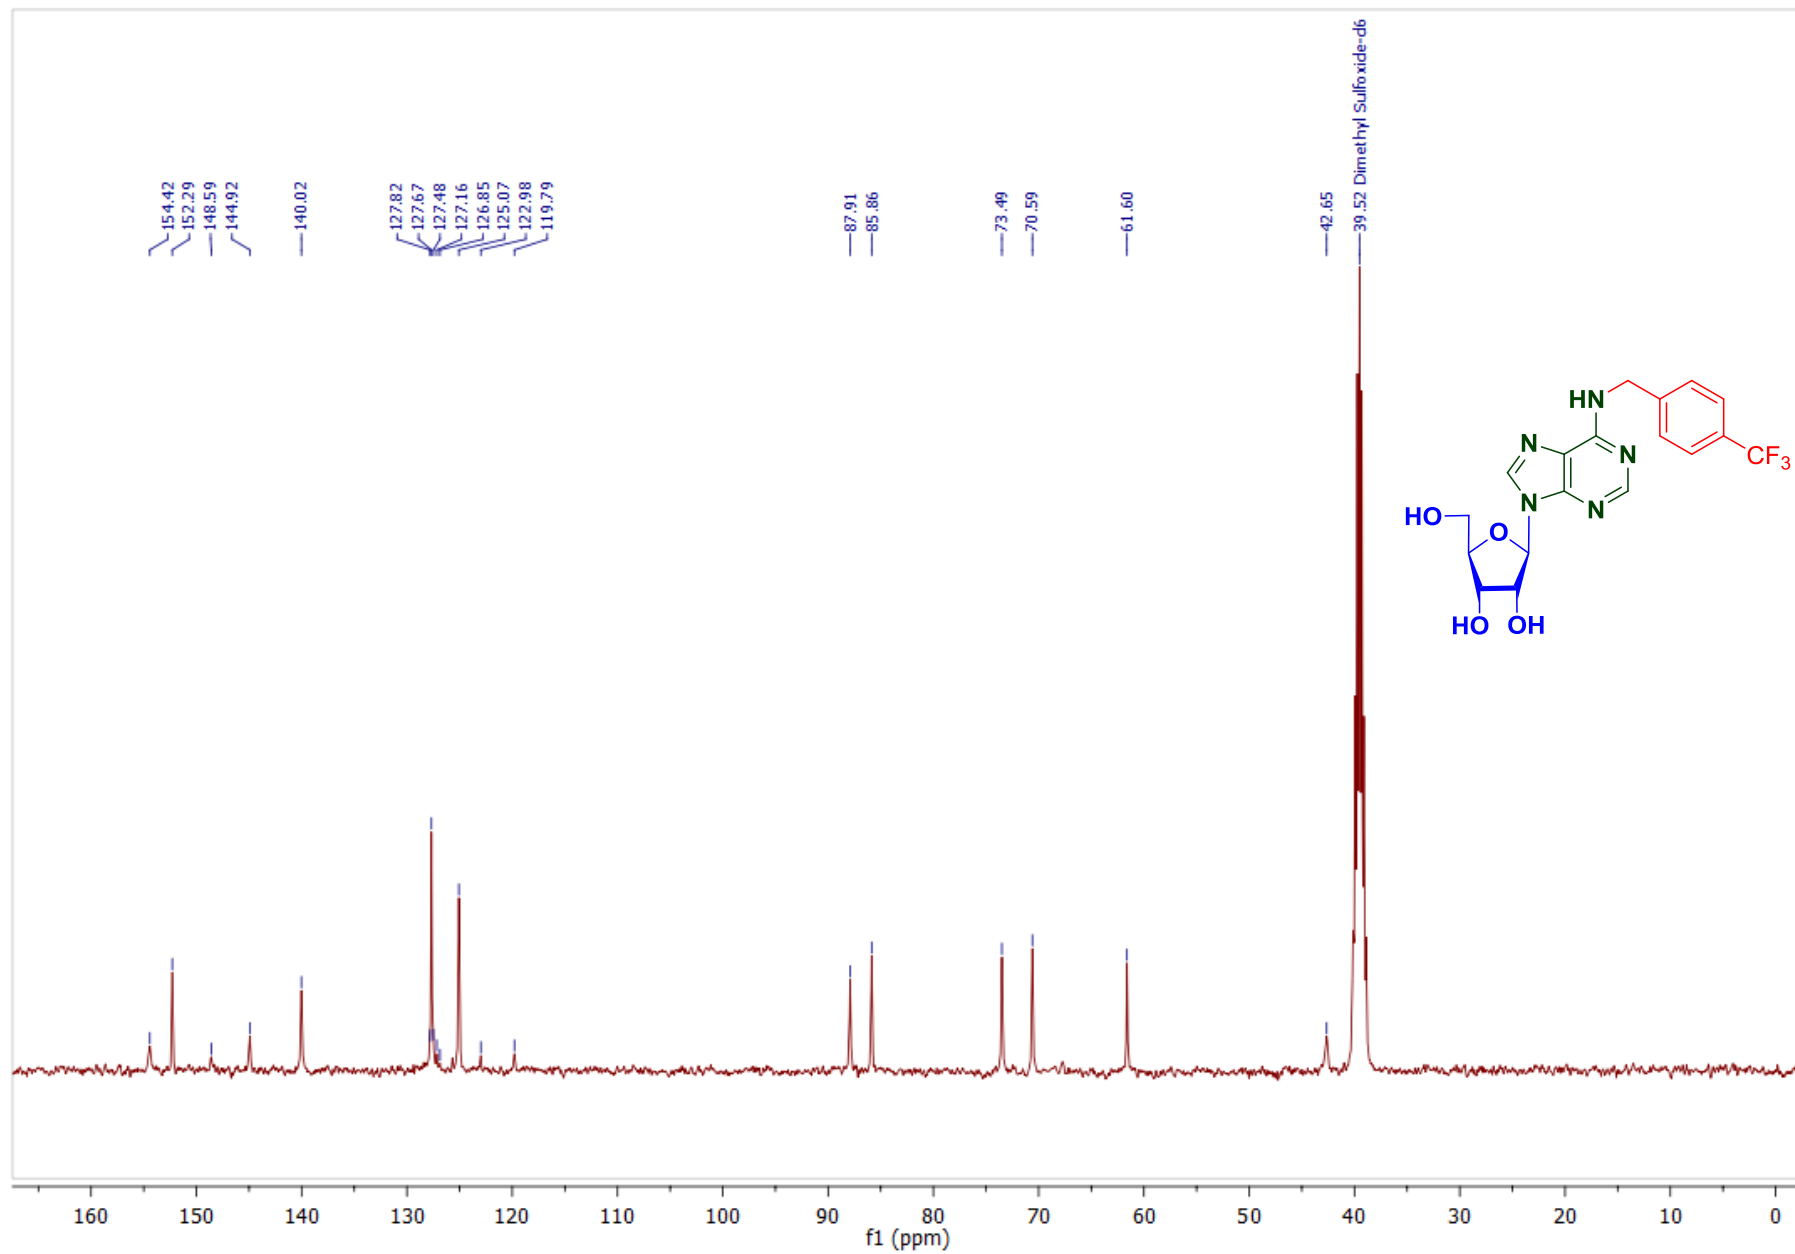

$^{13}\text{C}$ -NMR-spectrum (100 MHz) of  $N^6$ -(4-trifluoromethylbenzyl)adenosine (**11**) in  $\text{DMSO-}d_6$  at 303 K

### Acquisition Parameter

|             |          |                      |          |                  |           |
|-------------|----------|----------------------|----------|------------------|-----------|
| Source Type | ESI      | Ion Polarity         | Positive | Set Nebulizer    | 0.4 Bar   |
| Focus       | Active   | Set Capillary        | 4500 V   | Set Dry Heater   | 200 °C    |
| Scan Begin  | 50 m/z   | Set End Plate Offset | -500 V   | Set Dry Gas      | 4.0 l/min |
| Scan End    | 3000 m/z | Set Charging Voltage | 2000 V   | Set Divert Valve | Source    |
|             |          | Set Corona           | 0 nA     | Set APCI Heater  | 0 °C      |

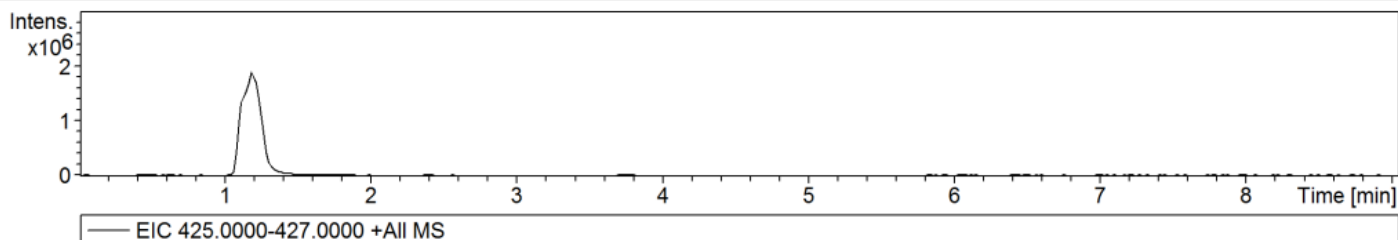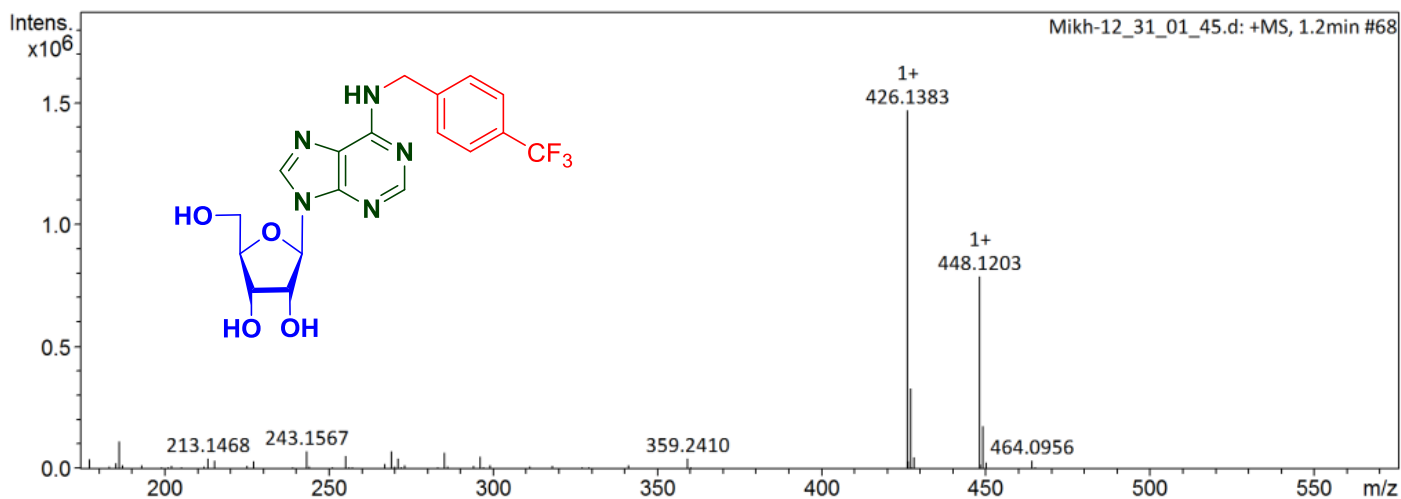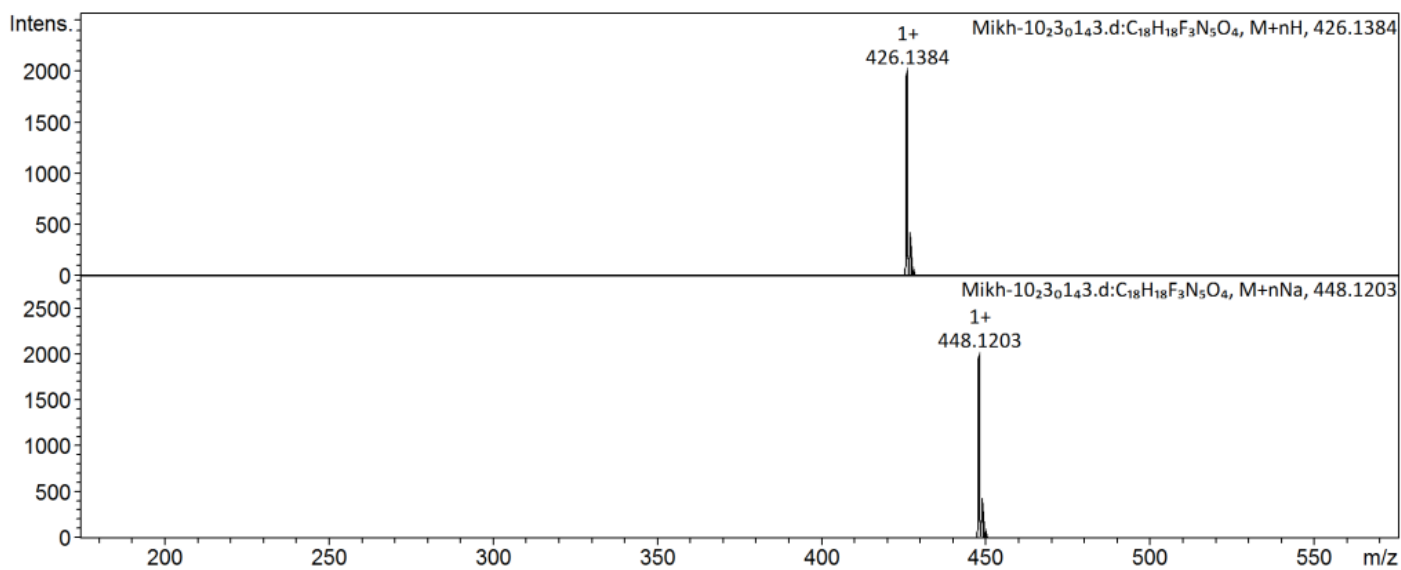

High-resolution mass spectrum (HRMS) of *N*<sup>6</sup>-(4-trifluoromethylbenzyl)-adenosine (**11**)
